1 **Do size and shape matter? Exploring the interactions and the**  
2 **metabolome of the soil isolate *Hylemonella gracilis***

3

4 **Olaf Tyc<sup>1,2\*</sup>, Purva Kulkarni<sup>1,3</sup>, Adam Ossowicki<sup>1</sup>, Vittorio Tracanna<sup>4</sup>, Marnix H.**  
5 **Medema<sup>4</sup>, Peter van Baarlen<sup>5</sup>, W.F.J. van Ijcken<sup>6</sup>, Koen J. F. Verhoeven<sup>1</sup> and Paolina**  
6 **Garbeva<sup>1,7</sup>**

7

8 <sup>1</sup>Netherlands Institute of Ecology (NIOO-KNAW), Department of Microbial Ecology, PO  
9 BOX 50, 6700 AB Wageningen, Netherlands

10

11 <sup>2</sup>Goethe University, Department of Internal Medicine I, University Hospital Frankfurt,  
12 Theodor-Stern-Kai 7, 60590 Frankfurt, Germany

13

14 <sup>3</sup>Translational Metabolic Laboratory, Radboud University Medical Center, Geert Grooteplein  
15 zuid 10, 6525 GA Nijmegen, Netherlands

16

17 <sup>4</sup>Wageningen University, Department of Plant Sciences, Bioinformatics Group,  
18 Droevendaalsesteeg 1, 6708PB Wageningen, Netherlands

19

20 <sup>5</sup>Wageningen University, Department of Animal Sciences, Host-Microbe Interactomics,  
21 Postbus 338, 6700 WD Wageningen, Netherlands

22

23 <sup>6</sup>Center for Biomics, Erasmus University Medical Center, Building Ee, Room Ee6.79b  
24 Wytemaweg 80, 3015 CN Rotterdam Rotterdam, The Netherlands

25

26 <sup>7</sup>Department of Plant and Environmental Sciences, Faculty of Natural and Life Sciences,  
27 University of Copenhagen, Denmark

28

29 **Correspondence:**

30 Goethe University, Department of Internal Medicine I, University Hospital Frankfurt, Theodor-  
31 Stern-Kai 7, 60590 Frankfurt, Germany, [E-Mail: olaf.tyc@kgu.de](mailto:olaf.tyc@kgu.de)

32

33 **Conflict of Interest Statement**

34 The authors declare that the research was conducted in the absence of any commercial or  
35 financial relationships that could be construed as a potential conflict of interest.

36

37 **Keywords:** Small soil bacteria; *Hylemonella* sp.; Interspecific interactions; Volatile-organic-  
38 compounds; Transcriptome analysis; Metabolome analysis

39 **Abstract**

40 Microbial community analysis of aquatic environments showed that an important component  
41 of microbial diversity consists of bacteria with cell sizes smaller than  $\sim 0.1 \mu\text{m}$ . However, so far  
42 no study investigated if such bacteria with small cell sizes exist in terrestrial environments as  
43 well.

44  
45 Here, we isolated soil bacteria that passed through a  $0.1 \mu\text{m}$  filter, by applying a novel isolation  
46 and culturing approach. The complete genome of one of the isolates was sequenced and the  
47 bacterium was identified as *Hylemonella gracilis*. We performed a set of interaction assays with  
48 phylogenetically distant soil bacteria with larger cell and genome size. The interaction assays  
49 revealed that *H. gracilis* grows better when interacting with other soil bacteria like  
50 *Paenibacillus* sp. AD87 and *Serratia plymuthica*. Furthermore, we observed that *H. gracilis* is  
51 able to change the behavior of interacting bacteria without direct cell-cell contact.  
52 Transcriptomics and metabolomics analysis was performed with the aim to explain the  
53 mechanisms of these interactions.

54  
55 Our study indicates that soil bacteria that can pass through a  $0.1 \mu\text{m}$  filter may have been  
56 overlooked in soil microbial communities and that such bacteria are able to induce  
57 transcriptional and metabolomics responses in other soil-bacteria. Furthermore, we revealed  
58 that the interaction allowed utilization of substrates that are not utilized by monocultures.

59

60

61

62

63

64

65

66

67

68

69

## 70 **Introduction**

71 Bacteria are ubiquitous living organisms with various cell shapes and sizes surrounding us in  
72 all environments (1, 2). Soil is the most complex habitat harboring the largest diversity and  
73 density of bacteria known to date (cell densities ranging from  $10^7$  to  $10^{10}$  cells/g of soil (3-5).  
74 Soil bacteria are part of a community where they are in constant interaction with their own and  
75 other species (6-8). Bacteria produce and release a plethora of metabolites into their  
76 environment. In this way, they not only modify their niche but also affect the behavior and the  
77 secondary metabolite production of nearby bacteria (9-11). Soil bacteria are known to produce  
78 both soluble and volatile secondary metabolites with different physicochemical and biological  
79 properties (7, 12-14). In contrast to soluble compounds, volatile organic compounds (VOCs)  
80 are rather small molecules ( $< 300$  Da) that can diffuse easily through air- and water-filled soil-  
81 pores, (15-17). These physiochemical properties make VOCs ideal metabolites for long-  
82 distance communication and interactions between soil microorganisms (18-21).  
83 In aquatic environments, bacteria are naturally found at lower cell density of  $10^3 - 10^6$  cells/mL  
84 (22-24). Recent studies have shown that a significant component of microbial diversity consists  
85 of bacteria with cell sizes smaller than  $\sim 0.1 \mu\text{m}$  (25-27). However, little is known about bacteria  
86 with such small cell sizes in soil environments. One can assume that small cell size can be an  
87 advantage in challenging environments like soil. The distribution of microorganisms in soil is  
88 influenced by its water and moisture content, a low soil moisture content leads to lower  
89 connectivity between soil pores, and thus to a lower number of accessible micro-habitats.

90 Small bacterial cell size is often linked to a small genome size caused by genome  
91 streamlining (28). Recent metagenomics studies suggest that genome streamlining is ubiquitous  
92 in many bacteria (29, 30). In some cases, the primary metabolism of one organism can be  
93 directly built on the primary metabolism of another organism, known as syntrophic  
94 relationships (31, 32). The Black Queen Hypothesis states that genome-streamlined organisms  
95 have an evolutionary advantage because of the loss of genes whose function can be replaced by  
96 bacteria in the surrounding environment, effectively conserving energy (33). Since bacteria  
97 with smaller genomes have less adaptive capacity compared to bacteria with bigger genome  
98 sizes, many of them depend on specific environmental conditions and the presence of other  
99 specific organisms (34) to produce metabolites that support their persistence.

100 Here, we explore if soil bacteria that are able to pass through  $0.1 \mu\text{m}$  filters are present in soil  
101 and we investigated their interaction with other soil bacteria. The major research questions were  
102 if, and how inter-specific interactions between bacteria smaller than  $0.1 \mu\text{m}$  and other common

103 soil bacteria affected fitness, behavior, gene expression, and the production of secondary  
104 metabolites.

105

## 106 **Materials and Methods**

### 107 **Isolation and identification of bacteria that pass through 0.1 $\mu\text{m}$ filters**

108 Please see **Fig. S1** and Supplementary Methods.

109

### 110 **Identification of bacteria that passed through 0.1 $\mu\text{m}$ filter**

111 One type of bacterial colony was observed on the inoculated plates. The grown colonies were  
112 later identified as *Hylemonella gracilis* by 16S rRNA sequence analysis. Please see  
113 Supplementary Methods.

114

### 115 **Bacteria and culture conditions**

116 Please see Supplementary Methods and **Supplementary Table 1**.

117

### 118 **Microscopy**

119 Please see **Supplementary Methods**.

120

### 121 **Bacterial interactions assays on 1/10<sup>th</sup> TSBA plates**

122 For the interaction assay, liquid bacterial cultures were diluted to an OD<sub>600</sub> of 0.005  
123 (*Paenibacillus* and *Serratia*) or to an OD<sub>600</sub> of 0.05 (*H. gracilis*). A 10  $\mu\text{l}$  droplet was added in  
124 the middle of a 6 cm diameter Petri dish (monocultures) or next to each other in a distance of  
125  $\sim$ 0.5 cm (pairwise interactions), for details please see Supplementary Methods.

126

### 127 **Effects of cell-free supernatants of *Paenibacillus* and *Serratia* on the growth of *H. gracilis***

128 Please see Supplementary Methods.

129

### 130 **DNA isolation and genome sequencing of *H. gracilis***

131 Genomic DNA of *H. gracilis* was extracted using a QIAGEN Genomic-tip 500/G DNA kit  
132 Qiagen, cat# 10262 (for details see Supplementary Methods). The genome sequencing was  
133 performed on the PacBio RS II platform (Pacific Biosciences, Menlo Park, CA, USA) using  
134 P6-C4 chemistry at the Institute for Genome Sciences (IGS), Baltimore, Maryland, USA. The  
135 sequencing resulted in a total of 70,101 reads with N50 of 17 309 nucleotides. The PacBio raw  
136 sequences were analyzed using SMRT portal V2.3.0.140936. p.4150482. Sequences were

137 assembled *de novo* with the RS\_HGAP\_assembly 3 protocol (© Copyright 2010 - 2014, Pacific  
138 Biosciences, Menlo Park, CA, USA) with default settings on an estimated genome size of 3.8  
139 Mbp. The resulting assemblies were subjected to scaffolding using the RS\_AHA\_scaffolding  
140 1 protocol. The genome assembly properties are shown in **Supplementary Table 2**. The final  
141 contigs were annotated using PROKKA V1.11 (42) and InterproScan 5.16 55.0 (43). The  
142 whole genome sequence was submitted as *Hylemonella gracilis* strain NS1 to NCBI GenBank  
143 (<https://www.ncbi.nlm.nih.gov/genbank/>) under accession # CP031395.

144

#### 145 ***In silico* analysis of secondary metabolite gene clusters**

146 For *in silico* analysis of secondary metabolite gene clusters, the genome sequences of *H.*  
147 *gracilis*, *Paenibacillus sp.* AD87 and *Serratia plymuthica* PRI2C were submitted to the  
148 antiSMASH web server (<http://antismash.secondarymetabolites.org/>) version 4.0 (44).

149

#### 150 **RNA sampling, isolation and RNA- sequencing**

151 Please see Supplementary Methods.

152

#### 153 **Pathway annotations**

154 Please see Supplementary Methods.

155

#### 156 **Exploration of missing genes and genome streamlining in *Hylemonella***

157 RAST annotations of *Serratia*, *Paenibacillus* and *H. gracilis* were used to compare the genomes  
158 and to explore the genomes for missing genes in metabolic pathways (<http://rast.nmpdr.org>)  
159 (52-54). RAST was used to identify missing core genes in genomes. The missing gene  
160 sequences were extracted and assigned with KEGG Orthology (50, 55). Presence/absence of  
161 genes belonging to metabolic pathways was compared across the three genomes to identify  
162 shared genes and pathways and to determine incomplete metabolic pathways in *H. gracilis*.

163

#### 164 **Catabolic profiling using BioLog EcoPlate™**

165 Please see Supplementary Methods.

166

#### 167 **Trapping of volatile organic compounds and GC-Q-TOF analysis**

168 Please see Supplementary Methods.

169

170

171 **Ambient mass-spectrometry imaging analysis (LAESI-MSI)**

172 Please see Supplementary Methods.

173

174 **Analysis of Ambient mass-spectrometry imaging (LAESI-MSI) Data**

175 Please see Supplementary Methods.

176

177 **Data availability**

178 The raw data of this article will be made available by the authors, to any qualified researcher.

179 The whole genome sequence of *Hylemonella* strain NS1 is available at the NCBI GenBank  
180 under accession # CP031395, the raw reads of the transcriptomics data are available at the  
181 Sequence Read Archive (SRA) <https://www.ncbi.nlm.nih.gov/sra> under accession #  
182 SUB8619726.

183

184 **Results**

185 **Isolation and identification of bacteria that pass through 0.1 µM filter**

186 Using a novel bacterial isolation and cultivation approach, we isolated bacteria from a terrestrial  
187 soil sample able to pass through a 0.22 µm and a 0.1 µm pore-size filters. The bacteria were  
188 identified as *Hylemonella gracilis* (Gram-negative, class betaproteobacteria, order  
189 Burkholderiales). The colonies showed a round and colorless morphology when grown on  
190 1/10<sup>th</sup> TSBA plates (**Fig. 1a**). Microscopically the bacteria had a spiraled morphology with a  
191 length of approximately 6 - 12 µm which is typical for *Hylemonella* species (**Fig. 1b**).

192

193 ***Hylemonella* grows better in interaction with other bacteria**

194 *H. gracilis* growth was determined during the interaction with two phylogenetically distantly  
195 related soil bacteria (*Paenibacillus* sp. AD87 and *Serratia plymuthica* PRI-2C) and compared  
196 to that of the monoculture. The bacterial colony forming units of *H. gracilis* (CFU/mL) obtained  
197 on 1/10<sup>th</sup> TSBA plates from monocultures and interactions are summarized in **Fig. 2**. Cell  
198 counts of *Paenibacillus* were  $7.68 \times 10^7$  CFU/mL in interaction with *H. gracilis* (**Fig. 2a**).  
199 During the interaction with *H. gracilis*, the growth of *Serratia* was significantly negatively  
200 affected ( $P=0.037$ ) after five days of incubation by reaching  $1.47 \times 10^9$  CFU/mL compared to  
201 the monocultures (**Fig. 2a**).

202 The bacterial colony forming units (CFU) obtained from *H. gracilis* grown in presence of cell  
203 free supernatants (CFS) of *Paenibacillus* and *Serratia* are summarized in **Fig. 2b**. *H. gracilis*  
204 growth was significantly increased ( $P=0.011$ ) when growing in presence of cell free

205 supernatants of *Paenibacillus* resulting in higher cell counts compared to the monoculture by  
206 reaching  $1.10 \times 10^6$  CFU/mL. In the presence of cell free supernatant from *Serratia*, *H. gracilis*  
207 reached the highest cell counts at  $1.72 \times 10^6$  CFU/mL ( $P=0.000$ ) after five days of incubation  
208 (**Fig. 2b**).

209

### 210 **Interaction between bacterial species allows use of substrates that are not used in** 211 **monoculture**

212 The catabolic profiling using EcoPlates™ revealed that *Paenibacillus* was able to utilize 11 of  
213 the 31 carbon sources in monoculture, *Serratia* and *H. gracilis* were able to utilize 17 and 16  
214 carbon sources respectively. Interestingly, three compounds could be utilized only during co-  
215 cultivation of *H. gracilis* with one of the other species, these compounds could not be utilized  
216 by any of the species in monoculture. Specifically, alpha- cyclodextrin was utilized only during  
217 co-cultivation of *H. gracilis* with *Paenibacillus*, while L-threonine and glycyl-L-glutamic acid  
218 were utilized only during the interaction of *Serratia* and *H. gracilis* **Fig. 3**.

219

### 220 **Genomic features of *H. gracilis*, *Serratia* and *Paenibacillus***

221 Sequencing of the complete genome of *H. gracilis* resulted in a genome size of 3.82 Mbp with  
222 3,648 coding sequences (CDS). As expected, the genome analysis revealed that the genome of  
223 *Hylemonella* is smaller and contains fewer genes when compared to both *Serratia plymuthica*  
224 PRI-2C (5.4 Mbp) and *Paenibacillus* sp. AD87 (7 Mbp). The genome features of all three  
225 bacteria are summarized in **Supplementary Table 2**.

226

### 227 ***In silico* analysis of gene clusters encoding for secondary metabolites**

228 *In silico* analysis of *Paenibacillus* revealed a total of 10 gene clusters coding for secondary  
229 metabolites. From which two gene clusters belonged to the class of terpenes, one to  
230 bacteriocins, one to lasso peptides, two to the class of lantipeptides, one to nonribosomal  
231 peptides, one to others, one to the class of type III polyketide synthases and one gene cluster  
232 belonging to the class of siderophores (**Fig. 4a**). For *Serratia* the *in silico* analysis revealed in  
233 total 9 gene clusters from which two gene clusters belonged to the class of Non-Ribosomal  
234 Peptides, one to Hsr-lactones, one to Aryl polyene- Siderophores, one to the class of T1PKS-  
235 NRPS hybrids, one to the class of Thiopeptides, one to the class of Butyrolactones, one to the  
236 class of Terpenes and one to the class of others (**Fig. 4b**). For *H. gracilis* the AntiSMASH  
237 analysis revealed that *H. gracilis* possesses relatively few gene clusters related to secondary  
238 metabolism. A total of three gene clusters for *H. gracilis* were detected, of which one belonged

239 to the class of bacteriocins, one to the class of terpenes, and one to aryl polyenes, the latter  
240 being a homolog to the aryl polyene gene cluster from *Xenorhabdus doucetiae* (Genbank:  
241 NZ\_FO704550.1) **Fig. 4c**.

242

### 243 **Pathway analysis in *H. gracilis* compared to *Serratia* and *Paenibacillus***

244 The RAST comparison of *Paenibacillus* and *H. gracilis* revealed that 504 unique enzymes  
245 (according to their EC numbers) were exclusive to *Paenibacillus*, while 434 were present only  
246 in *H. gracilis*; 532 EC numbers shared by both genomes (**Fig. 5a**). The RAST comparison of  
247 *Serratia* and *H. gracilis* revealed that 751 enzymes were present only in *Serratia*, and 260 were  
248 present only in *H. gracilis*. 727 EC numbers participating in diverse metabolic pathways were  
249 found in both genomes (**Fig. 5b**).

250 The RAST analysis revealed five missing genes in *H. gracilis* compared to *Serratia* and  
251 *Paenibacillus*. The missing genes were annotated with the following ontology terms:  
252 GO:0008473 (ornithine cyclodeaminase activity), GO:0008696 (4-amino-4-  
253 deoxychorismatylase activity), GO:0003920 (GMP reductase activity), GO:0004035 (alkaline  
254 phosphatase activity) and GO:0008442 (3-hydroxyisobutyrate dehydrogenase). We verified if  
255 the loss of these genes would render specific pathways obsolete. However, alternative pathways  
256 routes are present for these GO terms according to the KEGG database. The pathway analysis  
257 by RAST did not suggest any essential missing pathway components in metabolic pathways in  
258 *H. gracilis*. Still, the comparison of the number (n) of genes present in each RAST subsystem  
259 category revealed major differences in several subsystem categories, specifically in the  
260 categories "Carbohydrates metabolism" and "Phosphorus metabolism" (**Fig. 5c**). *H. gracilis*  
261 possesses no genes for these categories, whereas *Paenibacillus* possesses 393 and 82 genes,  
262 and *Serratia* 395 and 46 genes, respectively. A major difference in the absolute number of genes  
263 in a category is also observed for Amino Acids and Derivatives, for which *H. gracilis* possesses  
264 318 genes, *Paenibacillus* possesses 358 and *Serratia* 448 genes.

265

### 266 **Effect of inter-specific interactions on gene expression**

267 RNA- sequencing was performed to better understand the effects of bacterial interaction on  
268 gene expression of each interacting partner. The transcriptome analysis of monocultures and  
269 interspecies interactions revealed a total of 277 significant differentially expressed genes; 100  
270 down-regulated and 177 up-regulated (**Supplementary Table 2**).

271

272



273 *Effect of inter-specific interactions on gene expression in Paenibacillus and H. gracilis*

274 In *Paenibacillus* histidine biosynthesis and dephosphorylation genes were up-regulated  
275 (**Supplementary Table 3**), while cellular-growth-related genes were down-regulated  
276 (**Supplementary Table 3**) at day 10 of the interaction with *H. gracilis* (**Fig. 6b**). For the  
277 interaction of *H. gracilis* with *Paenibacillus* a total of 15 significant differentially expressed  
278 genes were found (0 at day 5 and 15 at day ten). At day five, genes related to sulfur assimilation,  
279 chemotaxis and response to (chemical/external) stimuli were upregulated in *H. gracilis* in the  
280 presence of *Paenibacillus*. Genes related signal transduction (T) were the category with the  
281 most differentially expressed genes during the interaction of *H. gracilis* with *Paenibacillus*  
282 compared to the monoculture of *H. gracilis* (**Supplementary Table 8 and 9, Fig. 6a, b**).

283

284 *Effect of inter-specific interactions on gene expression Serratia and H. gracilis*

285 During the interaction of *Serratia* with *H. gracilis*, 61 genes were significantly differentially  
286 expressed at day five and 10 at day ten. At the day five, iron-sulfur cluster-assembly-related  
287 genes, a sulfur transferase and a transaminase were up-regulated, while genes related to  
288 inorganic diphosphatase activity, exonuclease activity and DNA repair were downregulated. At  
289 day ten, genes related to sulfur transmembrane transport, sulfur compound catabolism and  
290 cysteine biosynthesis were upregulated, and genes related to sulfur compound metabolism and  
291 translation were downregulated. (**Supplementary Table 4 and 5**). For *Serratia*, genes related  
292 to signal transduction and translation, ribosome structure and biogenesis were the most  
293 differentially expressed gene categories (**Fig. 6c**). For *H. gracilis* in interaction with *Serratia*,  
294 182 differentially expressed genes were identified at day ten and only one at day five. At day  
295 five, genes related to the ribosome/ribonucleoproteins, organelle organisation/assembly and  
296 (iron)-sulfur cluster assembly were upregulated and genes related to the innate immune  
297 response (Toll Like Receptor signalling) were downregulated (**Supplementary Table 6 and 7**).  
298 At day ten, genes related to signal transduction and chemotaxis were up- regulated in *H.*  
299 *gracilis*. For *H. gracilis*, the most upregulated genes were linked to the chemotaxis pathway  
300 and iron scavenging, indicating activity in competition (**Fig. 6a**).

301

302 **Metabolomic analysis of volatile compounds**

303 The volatile blend composition of the monocultures differed from that of the co-cultures. Clear  
304 separations between the controls, monocultures and co-cultures were obtained in PLS-DA score  
305 plots (**Fig. 7a**). The analysis revealed a total of 25 volatile organic compounds produced by  
306 mono- and co-cultured bacteria that were not detected in the non-inoculated controls (**Table 2**).

307 Of these, 17 are identified and categorized in six chemical classes (alkenes, benzoids, sulfides,  
308 thiocyanates, terpenes, furans). The remaining eight compounds could not be assigned with  
309 certainty to a known compound. The most abundant volatile organic compounds were sulfur-  
310 containing compounds such as dimethyl disulfide (C<sub>2</sub>H<sub>6</sub>S<sub>2</sub>) and dimethyl trisulfide (C<sub>2</sub>H<sub>6</sub>S<sub>3</sub>).  
311 These two sulfur compounds were produced by all three bacteria. Interestingly an unknown  
312 compound with RT 26.4 min produced by the monocultures of *H. gracilis* was not detected in  
313 the interactions with *Serratia* (**Table 2**). Two other unknown compounds with RT 4.15 min and  
314 with RT 24.34 min produced by the monocultures of *Paenibacillus* were not detected in the  
315 interactions with *H. gracilis* (**Table 2**).

316

### 317 **DART-MS based metabolomics**

318 The metabolomics analysis based on DART-MS revealed separations between the controls,  
319 monocultures, and co-cultures as presented in PLS-DA score plots (**Fig. 7b**). The metabolomic  
320 composition of the monocultures differed from that of the co-cultures (**Fig. 7b**). Statistical  
321 analysis (ONE-WAY ANOVA and post-hoc TUKEY HSD-test) revealed 617 significant mass  
322 features present on day five and day ten of which 48 could be tentatively assigned to specific  
323 compounds. Most of the significant peaks were found in the co-cultures of *H. gracilis* with  
324 *Paenibacillus*. The significant mass features and the corresponding tentative metabolites can  
325 be found in **Supplementary Table 10**.

326

### 327 **Mass spectrometry imaging metabolomics**

328 LAESI-MSI was performed to visualize the localization of metabolites in their native  
329 environments in monoculture as well as during interaction without performing any extraction.  
330 Across all treatments, clear separation was observed amongst the samples for controls,  
331 monocultures and interactions (**Fig. 8a**). An average of 1050 mass features was detected per  
332 treatment. To list mass features that could explain separation amongst the controls,  
333 monocultures and interactions, values of variable importance in projection (VIP) were  
334 calculated. The top 40 statistically significant mass features with a VIP score > 2.0 are shown  
335 in **Fig. 8b**. The mass features have been listed based on their decreasing influence on  
336 classification amongst the different treatments. To visualize the statistically significant mass  
337 features between monoculture and interaction samples in a pairwise manner, volcano plots were  
338 constructed (**Fig. S3**). Metabolites with a log<sub>2</sub> fold change threshold of 1.0 on the x-axis and a  
339 t-test threshold (*p* value) of 1.0 on the y-axis were considered significantly differentially  
340 abundant between monoculture and interaction samples.

341 The volcano plot (**Fig. S3a**) for *Hylemonella* monoculture (HM) and the interaction of *H.*  
342 *gracilis* with *Paenibacillus* (PH) shows 53 mass features (in green) located in the upper right  
343 quadrant, indicating that their concentrations are significantly higher in HM as compared to  
344 PH. 18 mass features (in red) in the upper left quadrant of the plot have a significantly lower  
345 concentration in HM as compared to PH. The box-and-whisker plots for the four statistically  
346 significant differentially abundant metabolites selected from the volcano plot for the pair HM  
347 and PH are shown in **Fig. S2a**. The ion intensity maps for these statistically significant  
348 metabolites are shown alongside box-and-whisker plots. The ion intensity maps are color coded  
349 based on the standard rainbow color scale where a pixel in red represented a high concentration  
350 and the pixel in black represents no concentration of the selected metabolite. As can be seen,  
351  $m/z$  425.2886 and  $m/z$  558.2832 show higher abundance in interaction sample PH, whereas  $m/z$   
352 410.8587 and  $m/z$  716.7610 display high abundance in HM as compared to PH.

353  
354 For the pairwise analysis performed for *Paenibacillus* monoculture (PM) and the interaction of  
355 *H. gracilis* with *Paenibacillus* (PH), 149 mass features (in green) displayed significantly high  
356 concentration in PM and 75 mass features (in red) had significantly low concentration in PM  
357 as compared to PH (**Fig. S3b**). This is also evident in the box-and-whisker plots and the ion  
358 intensity maps that are presented for four statistically significant metabolites belonging to this  
359 set (**Fig. S2b**).

360  
361 For the pairwise analysis for *H. gracilis* monoculture (HM) and the interaction of *Serratia* and  
362 *H. gracilis* (SH), 57 mass features (in green) displayed significantly high concentration in HM  
363 and 42 mass features had significantly low concentration in HM as compared to SH (**Fig. S3c**).  
364 The box-and-whisker plots along with the ion intensity maps for four statistically significant  
365 metabolites belonging to this set are shown in **Fig. S2c**. For the pairwise analysis for *Serratia*  
366 monoculture (SM) and the interaction of *Serratia* and *H. gracilis* (SH), 135 mass features (in  
367 green) displayed significantly high concentration in SM and 65 mass features had significantly  
368 low concentration in SM as compared to SH (**Fig. S3d**). The box-and-whisker plots along with  
369 the ion intensity maps for four statistically significant metabolites belonging to this set are  
370 shown in **Fig. S2d**.

371  
372 To visualize the number of shared and unique metabolites amongst the monoculture and  
373 interaction samples Venn diagrams were plotted. The Venn diagram (**Fig. S3e**) for  
374 monocultures *H. gracilis* and *Paenibacillus* and their interaction shows 80 metabolites unique

375 to *H. gracilis* monoculture, 75 metabolites unique to *Paenibacillus* monoculture and 100  
376 metabolites that are unique during their interaction. 1062 metabolites were shared within these  
377 three treatments. Similarly, the Venn diagram (**Fig. S3f**) for monocultures *H. gracilis* and  
378 *Serratia* and their interaction shows 196 metabolites unique to *H. gracilis* monoculture, 48  
379 metabolites unique to *Serratia* monoculture and 120 metabolites that are unique during their  
380 interaction.

## 381 382 **Discussion**

383  
384 Here we report the first time isolation of *H. gracilis* from a terrestrial soil sample. This  
385 bacterium passed a 0.1  $\mu\text{m}$  filter, which suggests a very small cell size, justifying ultra-small  
386 bacteria (26). However, against our expectation, the microscopical analysis revealed that this  
387 bacterium is not ultra-small in cell size but possesses a very thin diameter and showed the  
388 typical spiraled morphology known for these species (63-66). These observations are in line  
389 with previous research by Wang et al. showing that *H. gracilis* is capable of passing through  
390 filters of various pore sizes ranging from 0.45  $\mu\text{m}$  to 0.1  $\mu\text{m}$  (67), most probably thanks to their  
391 cell shape and cell morphology.

392 The bacterial interaction assays revealed that *H. gracilis* grows better when interacting with  
393 *Paenibacillus* sp. Or *Serratia*. *H. gracilis* cell numbers were higher when exposed to cell-free  
394 supernatants of *Paenibacillus* and *Serratia*, suggesting that *H. gracilis* interaction benefits are  
395 related to the metabolites released by these bacteria. We hypothesized that *H. gracilis* grows  
396 better in co-culture, either because growth is stimulated by signals produced by the other  
397 organism, or because the environment that is created by the other organism allows *H. gracilis*  
398 to make more efficient use of the metabolic pathways. Indeed, the metabolic experiments with  
399 BioLog™ plates showed that during interspecific interactions of *H. gracilis* with *Paenibacillus*  
400 or with *Serratia*, more carbohydrates could be utilized compared to the monocultures. This is  
401 an interesting observation, as it indicates that the interaction of bacteria can trigger the  
402 production of exo-enzymes enabling the degradation of carbohydrates, which the bacteria were  
403 not able to degrade in monoculture.

404 We speculated that since *H. gracilis* grows better in interaction with other bacteria and is of  
405 relatively small cell size, it is possible that *H. gracilis* has evolved a genome streamlining  
406 strategy, i.e. the adaptive loss of genes for which functions it relies on interaction with other  
407 bacteria. Indeed, whole-genome sequencing of *H. gracilis* revealed a genome size of 3.82 Mbp.  
408 This is a relatively small genome size for free-living soil bacteria that typically have estimated  
409 average genome sizes of ~4.7 Mbp (34, 68-71). The *in silico* antiSMASH (44) comparison of

410 genes that are part of secondary metabolite gene clusters showed that the *H. gracilis* genome  
411 contained only three gene clusters encoding the production of secondary metabolites  
412 (bacteriocins, terpenes, and aryl polyenes), which provides additional evidence of genome  
413 streamlining. Terpenes and aryl polyenes are known as protective compounds against abiotic  
414 stressors, while bacteriocins have antimicrobial activities against closely related bacteria (17,  
415 72-76). We hypothesized that *H. gracilis* has undergone genome streamlining, to be more  
416 competitive, by retaining only the most essential metabolic functions. Genome streamlining  
417 refers to the reduction of genome size by loss of genes, which may for instance evolve in  
418 symbiotic or co-occurring species when some genomic functions are redundant in one species  
419 and are functionally compensated by other species (Giovannoni et. al., 2014). Thus, gene loss  
420 and reduced genome size may cause dependency on other microbes in their surroundings, and  
421 this may explain a considerable part of the phenomenon of the uncultured microbial majority.  
422 Interestingly, most of the data supporting streamlining theory come from the study of bacteria  
423 from aquatic environments, where bacterial cell density is lower. However, the same process  
424 may be important in high density soil microbial communities.

425

426 To understand the mechanisms of interaction, we performed transcriptome analysis on  
427 the interaction pairs of *H. gracilis* with *Serratia* and *Paenibacillus*. Interestingly, more  
428 significantly differentially expressed genes were induced by *H. gracilis* in the other two  
429 competing bacteria as compared to the transcriptomic changes in *H. gracilis* induced by  
430 *Serratia* or *Paenibacillus* (**Supplementary Table 2**). Several processes, enriched according to  
431 GO term enrichment analysis, could be part of a mechanism(s) mediating interactions between  
432 *H. gracilis* and *Serratia* and *Paenibacillus*, for example genes related to chemotaxis. Moreover,  
433 the GO terms for signal transduction, secondary metabolite production and, cell motility were  
434 enriched in the transcriptome of *H. gracilis* during the interaction with *Paenibacillus*,  
435 suggesting that chemotaxis is an important feature during interspecific interactions between  
436 these two bacterial taxa (77, 78). In addition, Iron-sulfur (Fe-S) complex assembly GO terms  
437 were enriched in the transcriptomes of *H. gracilis* during the interaction with *Serratia* and  
438 *Paenibacillus*. Fe-S clusters are important for sustaining fundamental life processes: they  
439 participate in electron transfer, substrate binding/activation, iron or sulfur storage, regulation of  
440 gene expression, and enzyme activity (80, 81). This up-regulation could indicate that in co-  
441 culture, the interacting bacteria releases metabolites that *H. gracilis* could use for synthesizing  
442 Fe-S complexes. It is also possible that iron-sulfur complex assembly is activated during  
443 competition with the interacting bacteria for sulfur, or iron collection (82-85).

444           The metabolic pathway analysis showed that the loss of genes in *H. gracilis* does not  
445 appear to have resulted in functional loss of metabolic pathways. However, shedding non-  
446 necessary redundant genes in several metabolic pathways could explain why and how the  
447 genome of *H. gracilis* has become so small. Nevertheless, the lost genes are not essential to  
448 complete metabolic pathways and only appear to result in limited options in certain metabolic  
449 pathways. The RAST analysis showed that all metabolic pathways remain feasible. The only  
450 exception is EC term 5.2.1.1 (maleate isomerase) which makes it not clear which alternative  
451 pathway can be used by *H. gracilis* to synthesize fumarate. There are several ways to synthesize  
452 fumarate, e.g. in the glycolysis pathway (66, 92, 93) and in the citric acid cycle (66, 94). The  
453 performed metabolomics analysis revealed the production of specific antimicrobial compounds  
454 such as pyrrolnitrin (*Serratia*) and 2,5-bis(1-methylethyl)-pyrazine (*Paenibacillus*) which are  
455 well known for their broad-spectrum antimicrobial activity (95-99). However, the produced  
456 antimicrobial compounds didn't show activity against *H. gracilis*: in both interactions, *H.*  
457 *gracilis* showed increased growth when growing in co-culture with either *Paenibacillus* or  
458 *Serratia*.

459           The understanding of natural metabolites that mediate interactions between organisms  
460 in natural environments is the key to elucidate ecosystem functioning. The detection and  
461 identification of the compounds that mediate such interactions is still challenging. Techniques  
462 such as mass spectrometry imaging (MSI) provide new opportunities to study environmentally  
463 relevant metabolites in their spatial context (35-37). In this study, the metabolomics was  
464 performed using three independent approaches namely DART-MS analysis, GC/MS-Q-TOF  
465 analysis and, ambient imaging mass spectrometry (LAESI-MS) from living bacterial colonies.  
466 The Imaging MS analysis revealed that several mass features were detected in higher abundance  
467 during the interaction of *H. gracilis* with *Paenibacillus*, these mass features were m/z 425.2886  
468 and m/z 558.2832. However, the here used technology (LAESI-MSI) is not suitable for  
469 unambiguous compound annotation, but LAESI-MSI can still be used for putative compound  
470 annotation. To annotate the detected mass features to compounds with high certainty, LAESI  
471 mass spectrometry imaging should be coupled with ion mobility separation as suggested by  
472 (100-102). Yet, LAESI-MSI can help to spatially distinguish the produced secondary  
473 metabolites of living bacterial colonies with limited sample preparation and can give insight  
474 into the spatial distribution of metabolites.

475           Several studies indicate that the volatile composition of the volatiles greatly depends on biotic  
476 interactions and on growth conditions (15, 19, 59, 103, 104). Here, a higher number of volatile  
477 compounds were detected in the bacterial interaction pairs, most likely due to the combination

478 of emitted volatiles of the interacting bacteria. The high amount of sulfur-containing  
479 compounds indicates that these compounds are commonly produced by bacteria and might play  
480 an important role in signaling during interspecific interactions (105, 106). However, no novel  
481 volatile compounds during the co-cultivation of the three bacteria were detected.

482 Overall, our study showed that *H. gracilis* is able to pass through 0.1 µM filter, and is present  
483 in terrestrial environments. The growth and behavior of *H. gracilis* were dependent on the  
484 interacting partner and they might be metabolically dependent on the neighboring bacteria. At  
485 the same time, *H. gracilis* is able to change the behaviour of the interacting bacteria without  
486 direct cell-cell contact. This study have laid a good bases for isolating soil bacterial with a small  
487 cell size and for exploring interactions between bacteria with different cell and genome size.  
488 Deciphering such interactions is key to understanding ecosystem functioning and the assembly  
489 of microbial communities.

490

491

#### 492 **Acknowledgement**

493 This work was financially supported by The Netherlands Organization for Scientific Research  
494 (NWO) VIDI personal grant 864.11.015 granted to PG. The authors also want to thank the  
495 students of the WUR bioinformatics course BIF-51806 (2018) for their input and primarily data  
496 analysis and discussions on the data.

497

#### 498 **Author contributions**

499 OT and PG designed the experiments. OT, AO, PK and WIJ performed the lab experiments.  
500 OT, PK and performed the data analysis and prepared the figures and tables. OT, PK, AO, VT,  
501 MHM, PB, KJFV and PG wrote the manuscript.

502

#### 503 **Figure legends**

504 **Figure 1: Microscopy pictures of *Hylemonella gracilis* (a) colonies on agar plates captured**  
505 **at 20x magnification and (b) single bacterial cells captured at 400 X magnification.**

506

507 **Figure 2: Colony counts (CFU/mL) revealed after 5 days of incubation during the plate**  
508 **based interaction experiment (a) and (b) revealed during the cell free supernatant (CFS)**  
509 **exposure experiment.** Abbreviations: *H. gracilis* monoculture (HM), *Paenibacillus* sp. AD87  
510 monoculture (PM), *Paenibacillus* sp. AD87 – *H. gracilis* coculture (PH), *S. plymuthica*  
511 monoculture (SM), *S. plymuthica* - *H. gracilis* coculture (SH). *H. gracilis* - *Paenibacillus* sp.  
512 AD87 coculture (HP), *H. gracilis* – *S. plymuthica* coculture (HS). Significant differences in

513 cell counts (CFU/mL) between co-cultures (treatment) and monocultures (controls) are  
514 indicated by asterisks (ONE-WAY ANOVA, post-hoc TUKEY test).

515

516 **Figure 3: Results overview of the Biolog EcoPlate™ experiment.** The EcoPlate contains 31  
517 different carbon sources, bacteria were inoculated in monoculture or in pairwise combinations.  
518 Colour codec: blue=carbon source could be utilized in monoculture, yellow= carbon source  
519 could be utilized in co-culture. Abbreviations: *Paenibacillus* sp. AD87 monoculture (PM),  
520 *Paenibacillus* sp. AD87 - *H. gracilis* coculture, (PH) *H. gracilis* monoculture (HM), *S.*  
521 *plymuthica* PRI-2C monoculture (SM), *S. plymuthica* PRI-2C - *H. gracilis* coculture  
522 (SH).

523

524 **Figure 4: *In silico* comparison of biosynthetic gene clusters (BGCs) present in the three soil**  
525 **bacteria based on antimash *in silico* analysis (<https://antismash.secondarymetabolites.org/>).**  
526 From left to right (a) *Paenibacillus* sp. AD87 with a genome size of 7.0 MBp, n=10 gene  
527 clusters for secondary metabolites, (b) *S. plymuthica* PRI-2C with a genome size of 5.4 MBp,  
528 n=9 gene clusters for secondary metabolites and (c) *H. gracilis* with a genome size of 3.8 MBp,  
529 n= 3 gene clusters for secondary metabolites.

530

531 **Figure 5:** Results of the comparison analysis carried out with the RAST pipeline  
532 (<https://rast.nmpdr.org/>) (a) Venn- diagram showing the results for the number (n) of expressed  
533 genes present solely in monoculture and the number of shared expressed genes for the  
534 monocultures of *Hylemonella* (HM), *Paenibacillus* monoculture (PM) and *Serratia*  
535 monoculture (SM) and the interaction of *Hylemonella* with *Paenibacillus* (PH) and for the  
536 interaction of *Hylemonella* with *Serratia* (SH). (b) Boxplot showing number (n) of expressed  
537 genes present in each RAST subsystem category.

538

539 **Figure 6: Pie-charts representing up-regulated genes identified by differential gene**  
540 **expression analysis and COG annotation (a) *Hylemonella gracilis* monoculture gene**  
541 **expression level (b) *H. gracilis* in co-culture with *Paenibacillus* sp. AD87; (c) *H. gracilis* co-**  
542 **culture with *S. plymuthica* PRI-2C. In the co-culture of *H. gracilis* with *Paenibacillus* sp. AD87,**  
543 **genes related to signal transduction (T) were the category with the most differentially expressed**  
544 **genes. In the co- culture of *H. gracilis* with *S. plymuthica* PRI-2C genes related to signal**  
545 **transduction (T), translation, ribosome structure and biogenesis (J) were the most prevalent**  
546 **differentially expressed gene categories.**



547 **Figure 7: PLSD-A plots of the metabolomics data (a)** PLS-DA 2D- plots of volatiles emitted  
548 by monocultures and pairwise combinations of *H. gracilis*, *Paenibacillus* and *Serratia*  
549 *plymuthica* after ten days of inoculation, time point (t=10 days) **(b)** PLS-DA 2D- plots of the  
550 analysed DART-MS data of monocultures and mixtures of *H. gracilis*, *Paenibacillus* sp. AD87  
551 and *Serratia plymuthica* PRI-2C after ten days of inoculation, time point (t=10 days).

552  
553 **Figure 8: PLS-DA plots of the first 40 significant mass features observed after analysis of**  
554 **the LAESI-MSI data. (a)** PLS-DA score plot for *H. gracilis* monoculture (HM), *Paenibacillus*  
555 *sp. AD87* monoculture (PM), *Paenibacillus* sp. AD87 – *H. gracilis* coculture (PH), *S.*  
556 *plymuthica* PRI-2C monoculture (SM), *S. plymuthica* PRI-2C - *H. gracilis* coculture (SH) and  
557 TSBA control (TSBA). **(b)** First 40 statistically significant features identified by PLS-DA based  
558 on Variable Importance in Projection (VIP) score. The colored boxes on the right indicate the  
559 relative concentrations of the corresponding metabolite in each group under study.

560

## 561 **References**

- 562 1. Gibbons SM, Gilbert JA. 2015. Microbial diversity—exploration of natural  
563 ecosystems and microbiomes. *Current Opinion in Genetics & Development* 35:66-  
564 72.
- 565 2. Levin PA, Angert ER. 2015. Small but Mighty: Cell Size and Bacteria. *Cold Spring*  
566 *Harbor Perspectives in Biology* 7.
- 567 3. Uroz S, Buee M, Murat C, Frey-Klett P, Martin F. 2010. Pyrosequencing reveals a  
568 contrasted bacterial diversity between oak rhizosphere and surrounding soil.  
569 *Environmental Microbiology Reports* 2:281-288.
- 570 4. Curtis TP, Sloan WT, Scannell JW. 2002. Estimating prokaryotic diversity and its  
571 limits. *Proc Natl Acad Sci U S A* 99:10494-9.
- 572 5. Torsvik V, Ovreas L. 2002. Microbial diversity and function in soil: from genes to  
573 ecosystems. *Curr Opin Microbiol* 5:240-5.
- 574 6. Stubbendieck RM, Vargas-Bautista C, Straight PD. 2016. Bacterial Communities:  
575 Interactions to Scale. *Frontiers in Microbiology* 7.
- 576 7. Hibbing ME, Fuqua C, Parsek MR, Peterson SB. 2010. Bacterial competition:  
577 surviving and thriving in the microbial jungle. *Nature Reviews Microbiology*  
578 8:15-25.
- 579 8. Cornforth DM, Foster KR. 2013. Competition sensing: the social side of bacterial  
580 stress responses. *Nature Reviews Microbiology* 11:285-293.
- 581 9. Traxler MF, Watrous JD, Alexandrov T, Dorrestein PC, Kolter R. 2013. Interspecies  
582 Interactions Stimulate Diversification of the *Streptomyces coelicolor* Secreted  
583 Metabolome. *Mbio* 4(4), e00459-13.
- 584 10. Tyc O, van den Berg M, Gerards S, van Veen JA, Raaijmakers JM, de Boer W,  
585 Garbeva P. 2014. Impact of interspecific interactions on antimicrobial activity  
586 among soil bacteria. *Frontiers in Microbiology* 5,.
- 587 11. Seyedsayamdost MR, Traxler MF, Clardy J, Kolter R. 2012. Old Meets New: Using  
588 Interspecies Interactions to Detect Secondary Metabolite Production in  
589 Actinomycetes. *Natural Product Biosynthesis by Microorganisms and Plants, Pt C*  
590 517:89-109.

- 591 12. Crits-Christoph A, Diamond S, Butterfield CN, Thomas BC, Banfield JF. 2018.  
592 Novel soil bacteria possess diverse genes for secondary metabolite biosynthesis.  
593 Nature 558:440-444.
- 594 13. Reddy BVB, Kallifidas D, Kim JH, Charlop-Powers Z, Feng ZY, Brady SF. 2012.  
595 Natural Product Biosynthetic Gene Diversity in Geographically Distinct Soil  
596 Microbiomes. Applied and Environmental Microbiology 78:3744-3752.
- 597 14. Charlop-Powers Z, Owen JG, Reddy BVB, Ternei MA, Brady SF. 2014. Chemical-  
598 biogeographic survey of secondary metabolism in soil. Proceedings of the  
599 National Academy of Sciences 111:3757-3762.
- 600 15. Schulz S, Dickschat JS. 2007. Bacterial volatiles: the smell of small organisms. Nat  
601 Prod Rep 24:814-42.
- 602 16. Kai M, Haustein M, Molina F, Petri A, Scholz B, Piechulla B. 2009. Bacterial  
603 volatiles and their action potential. Appl Microbiol Biotechnol 81:1001-12.
- 604 17. Tyc O, Song C, Dickschat JS, Vos M, Garbeva P. 2017. The Ecological Role of  
605 Volatile and Soluble Secondary Metabolites Produced by Soil Bacteria. Trends in  
606 Microbiology 25:280-292.
- 607 18. Chernin L, Toklikishvili N, Ovadis M, Kim S, Ben-Ari J, Khmel I, Vainstein A. 2011.  
608 Quorum-sensing quenching by rhizobacterial volatiles. Environmental  
609 Microbiology Reports 3:698-704.
- 610 19. Tyc O, Zweers H, De Boer W, Garbeva P. 2015. Volatiles in inter-specific bacterial  
611 interactions. Frontiers in Microbiology 6.
- 612 20. Schmidt R, Cordovez V, de Boer W, Raaijmakers J, Garbeva P. 2015. Volatile affairs  
613 in microbial interactions. ISME J doi:10.1038/ismej.2015.42.
- 614 21. Effmert U, Kalderas J, Warnke R, Piechulla B. 2012. Volatile mediated interactions  
615 between bacteria and fungi in the soil. J Chem Ecol 38:665-703.
- 616 22. Rocha AM, Yuan Q, Close DM, O'Dell KB, Fortney JL, Wu J, Hazen TC. 2016. Rapid  
617 detection of microbial cell abundance in aquatic systems. Biosensors and  
618 Bioelectronics 85:915-923.
- 619 23. Qin Y, Hou J, Deng M, Liu Q, Wu C, Ji Y, He X. 2016. Bacterial abundance and  
620 diversity in pond water supplied with different feeds. Scientific Reports 6:35232.
- 621 24. Pan D, Nolan J, Williams KH, Robbins MJ, Weber KA. 2017. Abundance and  
622 Distribution of Microbial Cells and Viruses in an Alluvial Aquifer. Frontiers in  
623 Microbiology 8.
- 624 25. McKay DS, Gibson EK, Thomas-Keprta KL, Vali H, Romanek CS, Clemett SJ, Chillier  
625 XDF, Maechling CR, Zare RN. 1996. Search for Past Life on Mars: Possible Relic  
626 Biogenic Activity in Martian Meteorite ALH84001. Science 273:924-930.
- 627 26. Luef B, Frischkorn KR, Wrighton KC, Holman H-YN, Birarda G, Thomas BC, Singh  
628 A, Williams KH, Siegerist CE, Tringe SG, Downing KH, Comolli LR, Banfield JF.  
629 2015. Diverse uncultivated ultra-small bacterial cells in groundwater. Nature  
630 Communications 6:6372.
- 631 27. Uwins Philippa JR, Webb Richard I, Taylor Anthony P. 1998. Novel nano-  
632 organisms from Australian sandstones, vol 83, p 1541.
- 633 28. Lynch M. 2006. Streamlining and simplification of microbial genome architecture.  
634 Annu Rev Microbiol 60:327-49.
- 635 29. Neuenschwander SM, Ghai R, Pernthaler J, Salcher MM. 2017.  
636 Microdiversification in genome-streamlined ubiquitous freshwater  
637 Actinobacteria. The Isme Journal 12:185.
- 638 30. Brewer TE, Handley KM, Carini P, Gilbert JA, Fierer N. 2016. Genome reduction in  
639 an abundant and ubiquitous soil bacterium 'Candidatus Udaeobacter copiosus'.  
640 Nature Microbiology 2:16198.

- 641 31. Dolfig J. 2013. Syntrophy in microbial fuel cells. *The Isme Journal* 8:4.  
642 32. Pande S, Kost C. 2017. Bacterial Unculturability and the Formation of  
643 Intercellular Metabolic Networks. *Trends in Microbiology* 25:349-361.  
644 33. Morris JJ, Lenski RE, Zinser ER. 2012. The Black Queen Hypothesis: Evolution of  
645 Dependencies through Adaptive Gene Loss. *mBio* 3.  
646 34. Giovannoni SJ, Cameron Thrash J, Temperton B. 2014. Implications of  
647 streamlining theory for microbial ecology. *The Isme Journal* 8:1553.  
648 35. Petras D, Jarmusch AK, Dorrestein PC. 2017. From single cells to our planet—  
649 recent advances in using mass spectrometry for spatially resolved metabolomics.  
650 *Current Opinion in Chemical Biology* 36:24-31.  
651 36. Hopwood DA. 2013. Imaging Mass Spectrometry Reveals Highly Specific  
652 Interactions between Actinomycetes To Activate Specialized Metabolic Gene  
653 Clusters. *Mbio* 4.  
654 37. Fang J, Dorrestein PC. 2014. Emerging mass spectrometry techniques for the  
655 direct analysis of microbial colonies. *Current Opinion in Microbiology* 19:120-  
656 129.  
657 38. Garbeva P, van Elsas JD, de Boer W. 2012. Draft Genome Sequence of the  
658 Antagonistic Rhizosphere Bacterium *Serratia plymuthica* Strain PRI-2C. *Journal*  
659 *of Bacteriology* 194:4119-4120.  
660 39. Tyc O, de Jager VCL, van den Berg M, Gerards S, Janssens TKS, Zaagman N, Kai M,  
661 Svatos A, Zweers H, Hordijk C, Besselink H, de Boer W, Garbeva P. 2017.  
662 Exploring bacterial interspecific interactions for discovery of novel antimicrobial  
663 compounds. *Microbial Biotechnology* 10:910-925.  
664 40. de Boer W, Wagenaar AM, Klein Gunnewiek PJA, van Veen JA. 2007. In vitro  
665 suppression of fungi caused by combinations of apparently non-antagonistic soil  
666 bacteria. *Fems Microbiology Ecology* 59:177-185.  
667 41. Garbeva P, de Boer W. 2009. Inter-specific Interactions Between Carbon-limited  
668 Soil Bacteria Affect Behavior and Gene Expression. *Microbial Ecology* 58:36-46.  
669 42. Seemann T. 2014. Prokka: rapid prokaryotic genome annotation. *Bioinformatics*  
670 30:2068-2069.  
671 43. Jones P, Binns D, Chang HY, Fraser M, Li W, McAnulla C, McWilliam H, Maslen J,  
672 Mitchell A, Nuka G, Pesseat S, Quinn AF, Sangrador-Vegas A, Scheremetjew M,  
673 Yong SY, Lopez R, Hunter S. 2014. InterProScan 5: genome-scale protein function  
674 classification. *Bioinformatics* 30:1236-40.  
675 44. Medema MH, Blin K, Cimermanic P, de Jager V, Zakrzewski P, Fischbach MA,  
676 Weber T, Takano E, Breitling R. 2011. antiSMASH: rapid identification, annotation  
677 and analysis of secondary metabolite biosynthesis gene clusters in bacterial and  
678 fungal genome sequences. *Nucleic Acids Research* 39:W339-46.  
679 45. Langmead B, Salzberg SL. 2012. Fast gapped-read alignment with Bowtie 2. *Nat*  
680 *Meth* 9:357-359.  
681 46. Li B, Dewey CN. 2011. RSEM: accurate transcript quantification from RNA-Seq  
682 data with or without a reference genome. *Bmc Bioinformatics* 12:1-16.  
683 47. Robinson MD, McCarthy DJ, Smyth GK. 2010. edgeR: a Bioconductor package for  
684 differential expression analysis of digital gene expression data. *Bioinformatics* 26.  
685 48. Zhou XB, Lindsay H, Robinson MD. 2014. Robustly detecting differential  
686 expression in RNA sequencing data using observation weights. *Nucleic Acids*  
687 *Research* 42.  
688 49. Team RC. 2014. R: A language and environment for statistical computing. R  
689 Foundation for Statistical Computing, Vienna, Austria. 2013.

- 690 50. Kanehisa M, Sato Y, Morishima K. 2016. BlastKOALA and GhostKOALA: KEGG  
691 Tools for Functional Characterization of Genome and Metagenome Sequences. *J*  
692 *Mol Biol* 428:726-731.
- 693 51. Sayers EW, Cavanaugh M, Clark K, Ostell J, Pruitt KD, Karsch-Mizrachi I. 2018.  
694 GenBank. *Nucleic Acids Research* 47:D94-D99.
- 695 52. Aziz RK, Bartels D, Best AA, DeJongh M, Disz T, Edwards RA, Formsma K, Gerdes  
696 S, Glass EM, Kubal M, Meyer F, Olsen GJ, Olson R, Osterman AL, Overbeek RA,  
697 McNeil LK, Paarmann D, Paczian T, Parrello B, Pusch GD, Reich C, Stevens R,  
698 Vassieva O, Vonstein V, Wilke A, Zagnitko O. 2008. The RAST Server: Rapid  
699 Annotations using Subsystems Technology. *BMC Genomics* 9:75.
- 700 53. Overbeek R, Olson R, Pusch GD, Olsen GJ, Davis JJ, Disz T, Edwards RA, Gerdes S,  
701 Parrello B, Shukla M, Vonstein V, Wattam AR, Xia F, Stevens R. 2014. The SEED  
702 and the Rapid Annotation of microbial genomes using Subsystems Technology  
703 (RAST). *Nucleic Acids Research* 42:D206-D214.
- 704 54. Brettin T, Davis JJ, Disz T, Edwards RA, Gerdes S, Olsen GJ, Olson R, Overbeek R,  
705 Parrello B, Pusch GD, Shukla M, Thomason JA, 3rd, Stevens R, Vonstein V, Wattam  
706 AR, Xia F. 2015. RASTtk: a modular and extensible implementation of the RAST  
707 algorithm for building custom annotation pipelines and annotating batches of  
708 genomes. *Sci Rep* 5:8365.
- 709 55. Kanehisa M, Sato Y, Kawashima M, Furumichi M, Tanabe M. 2016. KEGG as a  
710 reference resource for gene and protein annotation. *Nucleic Acids Research*  
711 44:D457-D462.
- 712 56. Anonymous. !!! INVALID CITATION !!!
- 713 57. Muñoz S, Lacarta J, Pata MP, Jiménez JJ, Navarro E. 2014. Analysis of the Diversity  
714 of Substrate Utilisation of Soil Bacteria Exposed to Cd and Earthworm Activity  
715 Using Generalised Additive Models. *PLOS ONE* 9:e85057.
- 716 58. Rutgers M, Wouterse M, Drost SM, Breure AM, Mulder C, Stone D, Creamer RE,  
717 Winding A, Bloem J. 2016. Monitoring soil bacteria with community-level  
718 physiological profiles using Biolog™ ECO-plates in the Netherlands and Europe.  
719 *Applied Soil Ecology* 97:23-35.
- 720 59. Garbeva P, Hordijk C, Gerards S, de Boer W. 2014. Volatiles produced by the  
721 mycophagous soil bacterium *Collimonas*. *Fems Microbiology Ecology* 87.
- 722 60. Gibb S, Strimmer K. 2012. MALDIquant: a versatile R package for the analysis of  
723 mass spectrometry data. *Bioinformatics* 28:2270-1.
- 724 61. Bardou P, Mariette J, Escudié F, Djemiel C, Klopp C. 2014. jvenn: an interactive  
725 Venn diagram viewer. *BMC Bioinformatics* 15:293.
- 726 62. Xia J, Sinelnikov IV, Han B, Wishart DS. 2015. MetaboAnalyst 3.0-making  
727 metabolomics more meaningful. *Nucleic Acids Research* 43:W251-7.
- 728 63. Hylemon PB, Wells JS, Krieg NR, Jannasch HW. 1973. The Genus *Spirillum*: a  
729 Taxonomic Study1. *International Journal of Systematic and Evolutionary*  
730 *Microbiology* 23:340-380.
- 731 64. Pawlowsk D, Raslawsky A, Siebert G, Metzger D, Koudelka G. 2011. Identification  
732 of *Hylemonella gracilis* as an Antagonist of *Yersinia pestis* Persistence. *J Bioterr*  
733 *Biodef S* 3:2.
- 734 65. Spring S, Jackel U, Wagner M, Kampfer P. 2004. *Ottowia thiooxydans* gen. nov., sp.  
735 nov., a novel facultatively anaerobic, N<sub>2</sub>O-producing bacterium isolated from  
736 activated sludge, and transfer of *Aquaspirillum gracile* to *Hylemonella gracilis*  
737 gen. nov., comb. nov. *Int J Syst Evol Microbiol* 54:99-106.
- 738 66. Willems A. 2014. The Family Comamonadaceae, p 777-851. *In* Rosenberg E,  
739 DeLong EF, Lory S, Stackebrandt E, Thompson F (ed), *The Prokaryotes*:

- 740 Alphaproteobacteria and Betaproteobacteria doi:10.1007/978-3-642-30197-  
741 1\_238. Springer Berlin Heidelberg, Berlin, Heidelberg.
- 742 67. Wang Y, Hammes F, Boon N, Egli T. 2007. Quantification of the filterability of  
743 freshwater bacteria through 0.45, 0.22, and 0.1  $\mu\text{m}$  pore size filters and shape-  
744 dependent enrichment of filterable bacterial communities. *Environmental*  
745 *science & technology* 41:7080-7086.
- 746 68. Cobo-Simón M, Tamames J. 2017. Relating genomic characteristics to  
747 environmental preferences and ubiquity in different microbial taxa. *BMC*  
748 *Genomics* 18:499.
- 749 69. Angly FE, Willner D, Prieto-Davó A, Edwards RA, Schmieder R, Vega-Thurber R,  
750 Antonopoulos DA, Barott K, Cottrell MT, Desnues C, Dinsdale EA, Furlan M,  
751 Haynes M, Henn MR, Hu Y, Kirchman DL, McDole T, McPherson JD, Meyer F, Miller  
752 RM, Mundt E, Naviaux RK, Rodriguez-Mueller B, Stevens R, Wegley L, Zhang L,  
753 Zhu B, Rohwer F. 2009. The GAAS Metagenomic Tool and Its Estimations of Viral  
754 and Microbial Average Genome Size in Four Major Biomes. *PLOS Computational*  
755 *Biology* 5:e1000593.
- 756 70. Frank JA, Sørensen SJ. 2011. Quantitative Metagenomic Analyses Based on  
757 Average Genome Size Normalization. *Applied and Environmental Microbiology*  
758 77:2513-2521.
- 759 71. Xia LC, Cram JA, Chen T, Fuhrman JA, Sun F. 2011. Accurate Genome Relative  
760 Abundance Estimation Based on Shotgun Metagenomic Reads. *PLOS ONE*  
761 6:e27992.
- 762 72. Lee GW, Lee S, Chung MS, Jeong YS, Chung BY. 2015. Rice terpene synthase 20  
763 (OsTPS20) plays an important role in producing terpene volatiles in response to  
764 abiotic stresses. *Protoplasma* 252:997-1007.
- 765 73. Loreto F, Schnitzler J-P. 2010. Abiotic stresses and induced BVOCs. *Trends in*  
766 *Plant Science* 15:154-166.
- 767 74. Heng NCK, Wescombe PA, Burton JP, Jack RW, Tagg JR. 2007. The diversity of  
768 bacteriocins in Gram-positive bacteria. *In* Riley MA, Chavan MA (ed),  
769 *Bacteriocins: ecology and evolution*. Springer, Berlin.
- 770 75. Riley MA. 2011. Bacteriocin-mediated competitive interactions of bacterial  
771 populations and communities, p 13-26, *Prokaryotic Antimicrobial Peptides*.  
772 Springer.
- 773 76. Riley MA, Wertz JE. 2002. Bacteriocins: evolution, ecology, and application.  
774 *Annual Review of Microbiology* 56.
- 775 77. Wadhams GH, Armitage JP. 2004. Making sense of it all: bacterial chemotaxis.  
776 *Nature reviews Molecular cell biology* 5:1024.
- 777 78. Szurmant H, Ordal GW. 2004. Diversity in chemotaxis mechanisms among the  
778 bacteria and archaea. *Microbiol Mol Biol Rev* 68:301-319.
- 779 79. Garbeva P, Silby MW, Raaijmakers JM, Levy SB, Boer W. 2011. Transcriptional  
780 and antagonistic responses of *Pseudomonas fluorescens* Pf0-1 to  
781 phylogenetically different bacterial competitors. *ISME Journal* 5:973-85.
- 782 80. Johnson DC, Dean DR, Smith AD, Johnson MK. 2005. Structure, function, and  
783 formation of biological iron-sulfur clusters. *Annu Rev Biochem* 74:247-81.
- 784 81. Bandyopadhyay S, Chandramouli K, Johnson MK. 2008. Iron-sulfur cluster  
785 biosynthesis. *Biochem Soc Trans* 36:1112-9.
- 786 82. Crowley D, Wang Y, Reid C, Szaniszlo P. 1991. Mechanisms of iron acquisition  
787 from siderophores by microorganisms and plants, p 213-232, *Iron Nutrition and*  
788 *Interactions in Plants*. Springer.

- 789 83. Allison SD. 2005. Cheaters, diffusion and nutrients constrain decomposition by  
790 microbial enzymes in spatially structured environments. *Ecology Letters* 8:626-  
791 635.
- 792 84. Pagès A, Grice K, Vacher M, Welsh DT, Teasdale PR, Bennett WW, Greenwood P.  
793 2014. Characterizing microbial communities and processes in a modern  
794 stromatolite (*S. hark B ay*) using lipid biomarkers and two - dimensional  
795 distributions of porewater solutes. *Environmental microbiology* 16:2458-2474.
- 796 85. Lill R. 2009. Function and biogenesis of iron-sulphur proteins. *Nature* 460:831.
- 797 86. Ishige T, Krause M, Bott M, Wendisch VF, Sahm H. 2003. The Phosphate  
798 Starvation Stimulon of *Corynebacterium glutamicum* Determined by DNA  
799 Microarray Analyses. *Journal of Bacteriology* 185:4519-4529.
- 800 87. Picard F, Loubière P, Girbal L, Coccain-Bousquet M. 2013. The significance of  
801 translation regulation in the stress response. *Bmc Genomics* 14:1-11.
- 802 88. Silberbach M, Burkovski A. 2006. Application of global analysis techniques to  
803 *Corynebacterium glutamicum*: New insights into nitrogen regulation. *Journal of*  
804 *Biotechnology* 126:101-110.
- 805 89. Takeuchi O, Sato S, Horiuchi T, Hoshino K, Takeda K, Dong Z, Modlin RL, Akira S.  
806 2002. Cutting edge: role of Toll-like receptor 1 in mediating immune response to  
807 microbial lipoproteins. *The Journal of Immunology* 169:10-14.
- 808 90. Hemmi H, Takeuchi O, Kawai T, Kaisho T, Sato S, Sanjo H, Matsumoto M, Hoshino  
809 K, Wagner H, Takeda K. 2000. A Toll-like receptor recognizes bacterial DNA.  
810 *Nature* 408:740.
- 811 91. Hayashi F, Smith KD, Ozinsky A, Hawn TR, Eugene CY, Goodlett DR, Eng JK, Akira  
812 S, Underhill DM, Aderem A. 2001. The innate immune response to bacterial  
813 flagellin is mediated by Toll-like receptor 5. *Nature* 410:1099.
- 814 92. Müller V. 2001. Bacterial fermentation. e LS.
- 815 93. Muñoz - Elías EJ, McKinney JD. 2006. Carbon metabolism of intracellular  
816 bacteria. *Cellular microbiology* 8:10-22.
- 817 94. Huynen MA, Dandekar T, Bork P. 1999. Variation and evolution of the citric-acid  
818 cycle: a genomic perspective. *Trends in microbiology* 7:281-291.
- 819 95. Beck HC, Hansen AM, Lauritsen FR. 2003. Novel pyrazine metabolites found in  
820 polymyxin biosynthesis by *Paenibacillus polymyxa*. *Fems Microbiology Letters*  
821 220:67-73.
- 822 96. Kucerova-Chlupacova M, Kunes J, Buchta V, Vejsova M, Opletalova V. 2015. Novel  
823 pyrazine analogs of chalcones: synthesis and evaluation of their antifungal and  
824 antimycobacterial activity. *Molecules* 20:1104-17.
- 825 97. Lapenda J, Silva P, Vicalvi M, Sena K, Nascimento S. 2015. Antimicrobial activity of  
826 prodigiosin isolated from *Serratia marcescens* UFPEDA 398. *World Journal of*  
827 *Microbiology and Biotechnology* 31:399-406.
- 828 98. Chernin L, Brandis A, Ismailov Z, Chet I. 1996. Pyrrolnitrin production by an  
829 *Enterobacter agglomerans* strain with a broad spectrum of antagonistic activity  
830 towards fungal and bacterial phytopathogens. *Current Microbiology* 32:208-212.
- 831 99. Dhar Purkayastha G, Mangar P, Saha A, Saha D. 2018. Evaluation of the biocontrol  
832 efficacy of a *Serratia marcescens* strain indigenous to tea rhizosphere for the  
833 management of root rot disease in tea. *PloS one* 13:e0191761-e0191761.
- 834 100. Kulkarni P, Wilschut RA, Verhoeven KJ, van der Putten WH, Garbeva P. 2018.  
835 LAESI mass spectrometry imaging as a tool to differentiate the root metabolome  
836 of native and range-expanding plant species. *Planta* 248:1515-1523.

- 837 101. Li H, Smith BK, Márk L, Nemes P, Nazarian J, Vertes A. 2015. Ambient molecular  
838 imaging by laser ablation electrospray ionization mass spectrometry with ion  
839 mobility separation. *International Journal of Mass Spectrometry* 377:681-689.
- 840 102. Stopka SA, Agtuca BJ, Koppenaar DW, Paša - Tolić L, Stacey G, Vertes A, Anderton  
841 CR. 2017. Laser - ablation electrospray ionization mass spectrometry with ion  
842 mobility separation reveals metabolites in the symbiotic interactions of soybean  
843 roots and rhizobia. *The Plant Journal* 91:340-354.
- 844 103. Schulz S, Fuhlendorff J, Reichenbach H. 2004. Identification and synthesis of  
845 volatiles released by the myxobacterium *Chondromyces crocatus*. *Tetrahedron*  
846 60:3863-3872.
- 847 104. Blom D, Fabbri C, Connor EC, Schiestl FP, Klauser DR, Boller T, Eberl L, Weisskopf  
848 L. 2011. Production of plant growth modulating volatiles is widespread among  
849 rhizosphere bacteria and strongly depends on culture conditions. *Environmental*  
850 *Microbiology* 13:3047-3058.
- 851 105. Kabil O, Vitvitsky V, Banerjee R. 2014. Sulfur as a signaling nutrient through  
852 hydrogen sulfide. *Annual review of nutrition* 34:171-205.
- 853 106. Audrain B, Farag MA, Ryu CM, Ghigo JM. 2015. Role of bacterial volatile  
854 compounds in bacterial biology. *Fems Microbiology Reviews* 39:222-233.  
855

**Table 1:** Genome assembly statistics and outcome of the *in silico* analysis on secondary metabolite gene clusters of *H. gracilis*, *Serratia plymuthica* PRI-2C and *Paenibacillus* sp. AD87.

| <b>Feature / Organism</b>                                    | <b><i>Hylemonella gracilis</i></b> | <b><i>S. plymuthica</i> PRI-2C</b> | <b><i>Paenibacillus</i> sp. AD87</b> |
|--------------------------------------------------------------|------------------------------------|------------------------------------|--------------------------------------|
| contigs                                                      | 1                                  | 1                                  | 30                                   |
| bases                                                        | 3822245                            | 5474685                            | 7086713                              |
| number of chromosomes                                        | 1                                  | 1                                  | 1                                    |
| size chromosome 1                                            | 3822245                            | 5464425                            | 7086713                              |
| CDS                                                          | 3648                               | 4929                               | 6216                                 |
| GC- content (%)                                              | 65.1                               | 55.7                               | 46.2                                 |
| number of RNAs                                               | 53                                 | 109                                | 146                                  |
| genes                                                        | 3625                               | 5284                               | 6375                                 |
| in silico detected secondary metabolite clusters (antiSMASH) | 3                                  | 9                                  | 10                                   |
| <b>Total genome size (bases)</b>                             | <b>3822245</b>                     | <b>5474685</b>                     | <b>7086713</b>                       |



1 **Table 2:** Tentatively identified volatile organic compounds (VOCs) produced by a *H.*  
 2 *gracilis*, *Serratia plymuthica* PRI-2C and *Paenibacillus* sp. AD87 strains in mono- and co-  
 3 cultures.

| #                                       | Compound name                   | RT*   | ELRI** | p-value*** | chemical class | Detected in treatment |           |           |           |           |
|-----------------------------------------|---------------------------------|-------|--------|------------|----------------|-----------------------|-----------|-----------|-----------|-----------|
|                                         |                                 |       |        |            |                | HM                    | SM        | SH        | PM        | PH        |
| 1                                       | 2-methylfuran                   | 2,18  | 738    | 0,041      | Furan          | X                     |           | X         | X         | X         |
| 2                                       | 2-methylpropanoic Acid          | 3,01  | 755    | 0,014      | Alkenes        | X                     | X         | X         | X         | X         |
| 3                                       | mix pentanal + heptane          | 3,21  | 760    | 0,008      | Alkenes        | X                     |           | X         |           | X         |
| 4                                       | methyl thycocyanate             | 3,44  | 764    | 0,020      | Thioesters     | X                     | X         | X         | X         | X         |
| 5                                       | 1-Pentanol                      | 3,95  | 772    | 0,012      | Alkenes        |                       | X         | X         | X         | X         |
| 6                                       | dimethyl disulfide              | 4,01  | 775    | 0,012      | Sulfides       | X                     | X         | X         | X         | X         |
| 7                                       | unknown compound 1              | 4,15  | 778    | 0,003      | -              |                       | X         | X         | X         |           |
| 8                                       | toluene                         | 4,44  | 784    | 0,014      | Benzenoids     | X                     | X         | X         | X         | X         |
| 9                                       | methyl Isovalerate              | 4,76  | 789    | 0,018      | Terpenes       |                       | X         | X         | X         | X         |
| 10                                      | cyclohexane                     | 8,07  | 852    | 0,031      | Alkenes        |                       | X         | X         | X         | X         |
| 11                                      | dimethyl trisulfide             | 11,35 | 914    | 0,013      | Sulfides       | X                     | X         | X         | X         | X         |
| 12                                      | benzotrillie                    | 12,06 | 928    | 0,037      | Alkenes        | X                     | X         | X         | X         | X         |
| 13                                      | 2-Ethyl-4-methylpentan-1-ol     | 17,26 | 1026   | 0,015      | Alkenes        |                       | X         | X         | X         | X         |
| 14                                      | 2,5-bis(1-methylethyl)-pyrazine | 20,56 | 1090   | 0,031      | Pyrazines      |                       |           |           | X         | X         |
| 15                                      | undecane                        | 21,31 | 1100   | 0,014      | Alkenes        | X                     |           | X         | X         | X         |
| 16                                      | unknown compound 2              | 24,34 | 1140   | 0,013      | -              |                       |           |           | X         |           |
| 17                                      | unknown compound 3              | 25,92 | 1160   | 0,011      | -              | X                     | X         | X         | X         | X         |
| 19                                      | unknown compound 4              | 26,40 | 1165   | 0,018      | -              | X                     |           | X         | X         | X         |
| 20                                      | unknown compound 5              | 26,90 | 1170   | 0,003      | -              | X                     |           |           | X         | X         |
| 21                                      | alpha-terpineol                 | 27,34 | 1178   | 0,016      | Terpenes       | X                     | X         | X         | X         | X         |
| 22                                      | undecane, 2,6-dimethyl          | 28,27 | 1190   | 0,004      | Benzenoids     | X                     | X         | X         | X         | X         |
| 23                                      | gamma-terpineol                 | 28,42 | 1192   | 0,006      | Terpenes       | X                     |           | X         |           |           |
| 24                                      | terpene like compound 1         | 29,32 | 1202   | 0,012      | Terpenes       | X                     |           | X         |           |           |
| 25                                      | terpene like compound 2         | 31,49 | 1231   | 0,009      | Terpenes       | X                     | X         | X         | X         | X         |
| <b>Number of detected compounds (n)</b> |                                 |       |        |            |                | <b>16</b>             | <b>15</b> | <b>20</b> | <b>20</b> | <b>19</b> |

4  
 5 Abbreviations:

6 HM= *H. gracilis* monoculture, SM= *Serratia plymuthica* PRI-2C monoculture, PM=  
 7 *Paenibacillus* sp. AD87 monoculture, PH= *Paenibacillus* sp. AD87 and *H. gracilis* co-  
 8 culture, SH= *Serratia plymuthica* PRI-2C and *H. gracilis* co-culture

9 # = Compound number

10 RT\* = Retention time, the RT value stated is the average of three technical replicates.

11 ELRI\*\* = Experimental linear retention index value, the RI value stated is the average of  
 12 three replicates.

13 p-value\*\*\*= statistical significance (peak area and peak intensity)

14

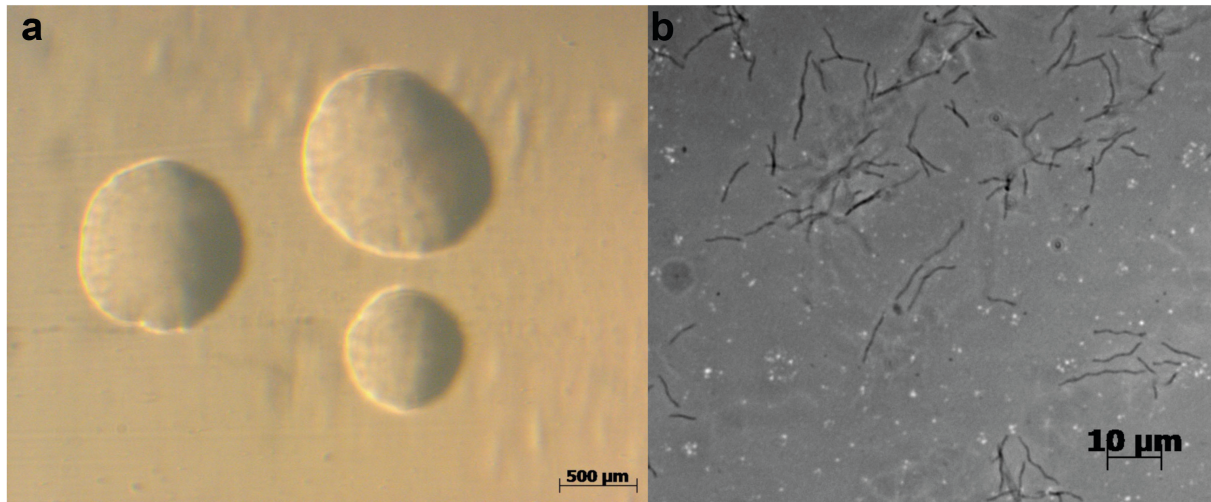

**Figure 1: Microscopy pictures of *Hylemonella gracilis* (a) colonies on agar plates captured at 20x magnification and (b) single bacterial cells captured at 400 X magnification.**

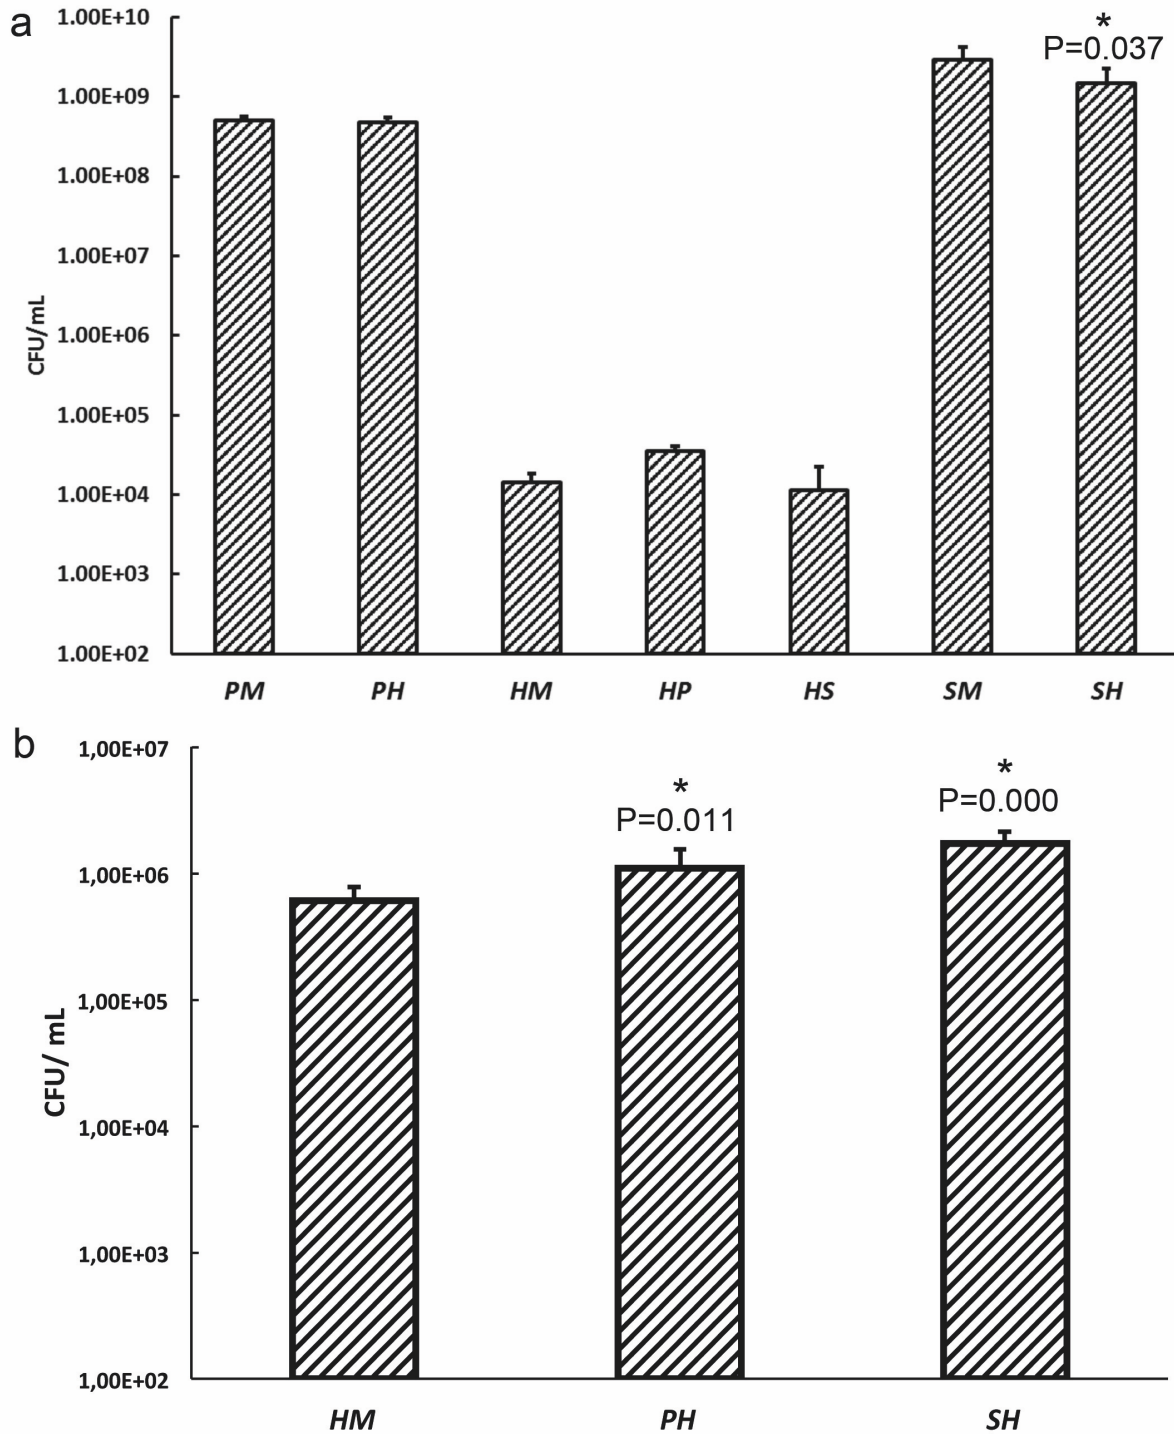

**Figure 2: Colony counts (CFU/mL) revealed after 5 days of incubation during the plate based interaction experiment (a) and (b) revealed during the cell free supernatant (CFS) exposure experiment.** Abbreviations: *H. gracilis* monoculture (HM), *Paenibacillus* sp. AD87 monoculture (PM), *Paenibacillus* sp. AD87 – *H. gracilis* coculture (PH), *S. plymuthica* monoculture (SM), *S. plymuthica* - *H. gracilis* coculture (SH). *H. gracilis* - *Paenibacillus* sp. AD87 coculture (HP), *H. gracilis* – *S. plymuthica* coculture (HS). Significant differences in cell counts (CFU/mL) between co-cultures (treatment) and monocultures (controls) are indicated by asterisks (ONE-WAY ANOVA, post-hoc TUKEY test).

| Strain/Treatment                    | PM   | SM   | HM   | PH     | SH     |
|-------------------------------------|------|------|------|--------|--------|
| <b>Compound</b>                     |      |      |      |        |        |
| Pyruvic Acid Methyl Ester           | Blue | Blue | Blue | Yellow | Yellow |
| Tween 40                            | Blue | Blue | Blue | Yellow | Yellow |
| Tween 80                            | Blue | Blue | Blue | Yellow | Yellow |
| $\alpha$ -Cyclodextrin              | Blue | Blue | Blue | Yellow | Yellow |
| Glycogen                            | Blue | Blue | Blue | Yellow | Yellow |
| D-Cellobiose                        | Blue | Blue | Blue | Yellow | Yellow |
| $\alpha$ -D-Lactose                 | Blue | Blue | Blue | Yellow | Yellow |
| $\beta$ -Methyl-D-Glucoside         | Blue | Blue | Blue | Yellow | Yellow |
| D-Xylose                            | Blue | Blue | Blue | Yellow | Yellow |
| i-Erythritol                        | Blue | Blue | Blue | Yellow | Yellow |
| D-Mannitol                          | Blue | Blue | Blue | Yellow | Yellow |
| N-Acetyl-D-Glucosamine              | Blue | Blue | Blue | Yellow | Yellow |
| D-Glucosaminic Acid                 | Blue | Blue | Blue | Yellow | Yellow |
| Glucose-1-Phosphate                 | Blue | Blue | Blue | Yellow | Yellow |
| D-L- $\alpha$ -Glycerol Phosphate   | Blue | Blue | Blue | Yellow | Yellow |
| D-Galactonic Acid $\gamma$ -Lactone | Blue | Blue | Blue | Yellow | Yellow |
| D-Galacturonic Acid                 | Blue | Blue | Blue | Yellow | Yellow |
| 2-Hydroxy Benzoic Acid              | Blue | Blue | Blue | Yellow | Yellow |
| 4-Hydroxy Benzoic Acid              | Blue | Blue | Blue | Yellow | Yellow |
| $\gamma$ -Hydroxybutyric Acid       | Blue | Blue | Blue | Yellow | Yellow |
| Lactonic Acid                       | Blue | Blue | Blue | Yellow | Yellow |
| $\alpha$ -Ketobutyric Acid          | Blue | Blue | Blue | Yellow | Yellow |
| D-Malic Acid                        | Blue | Blue | Blue | Yellow | Yellow |
| L-Arginine                          | Blue | Blue | Blue | Yellow | Yellow |
| L-Asparagine                        | Blue | Blue | Blue | Yellow | Yellow |
| L-Phenylalanine                     | Blue | Blue | Blue | Yellow | Yellow |
| L-Serine                            | Blue | Blue | Blue | Yellow | Yellow |
| L-Threonine                         | Blue | Blue | Blue | Yellow | Yellow |
| Glycyl-L-Glutamic Acid              | Blue | Blue | Blue | Yellow | Yellow |
| Phenylethyl-amine                   | Blue | Blue | Blue | Yellow | Yellow |
| Putrescine                          | Blue | Blue | Blue | Yellow | Yellow |

**Figure 3: Results overview of the Biolog EcoPlate™ experiment.** The EcoPlate contains 31 different carbon sources, bacteria were inoculated in monoculture or in pairwise combinations. Colour codec: blue=carbon source could be utilized in monoculture, yellow=carbon source could be utilized in co-culture. Abbreviations: *Paenibacillus* sp. AD87 monoculture (PM), *Paenibacillus* sp. AD87 - *H. gracilis* coculture, (PH) *H. gracilis* monoculture (HM), *S. plymuthica* PRI-2C monoculture (SM), *S. plymuthica* PRI-2C - *H. gracilis* coculture (SH).

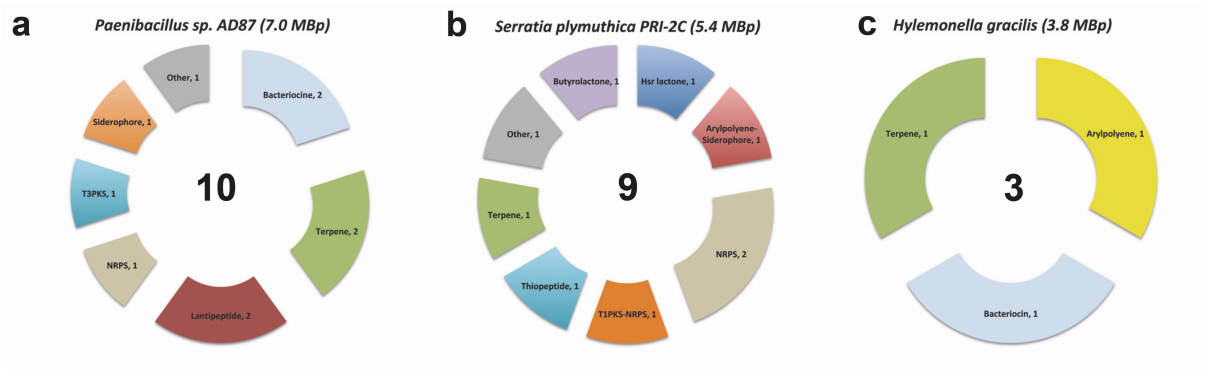

**Figure 4: *In silico* comparison of biosynthetic gene clusters (BGCs) present in the three soil bacteria based on antismash *in silico* analysis (<https://antismash.secondarymetabolites.org/>).** From left to right (a) *Paenibacillus* sp. AD87 with a genome size of 7.0 MBp, n=10 gene clusters for secondary metabolites, (b) *S. plymuthica* PRI-2C with a genome size of 5.4 MBp, n=9 gene clusters for secondary metabolites and (c) *H. gracilis* with a genome size of 3.8 MBp, n= 3 gene clusters for secondary metabolites.

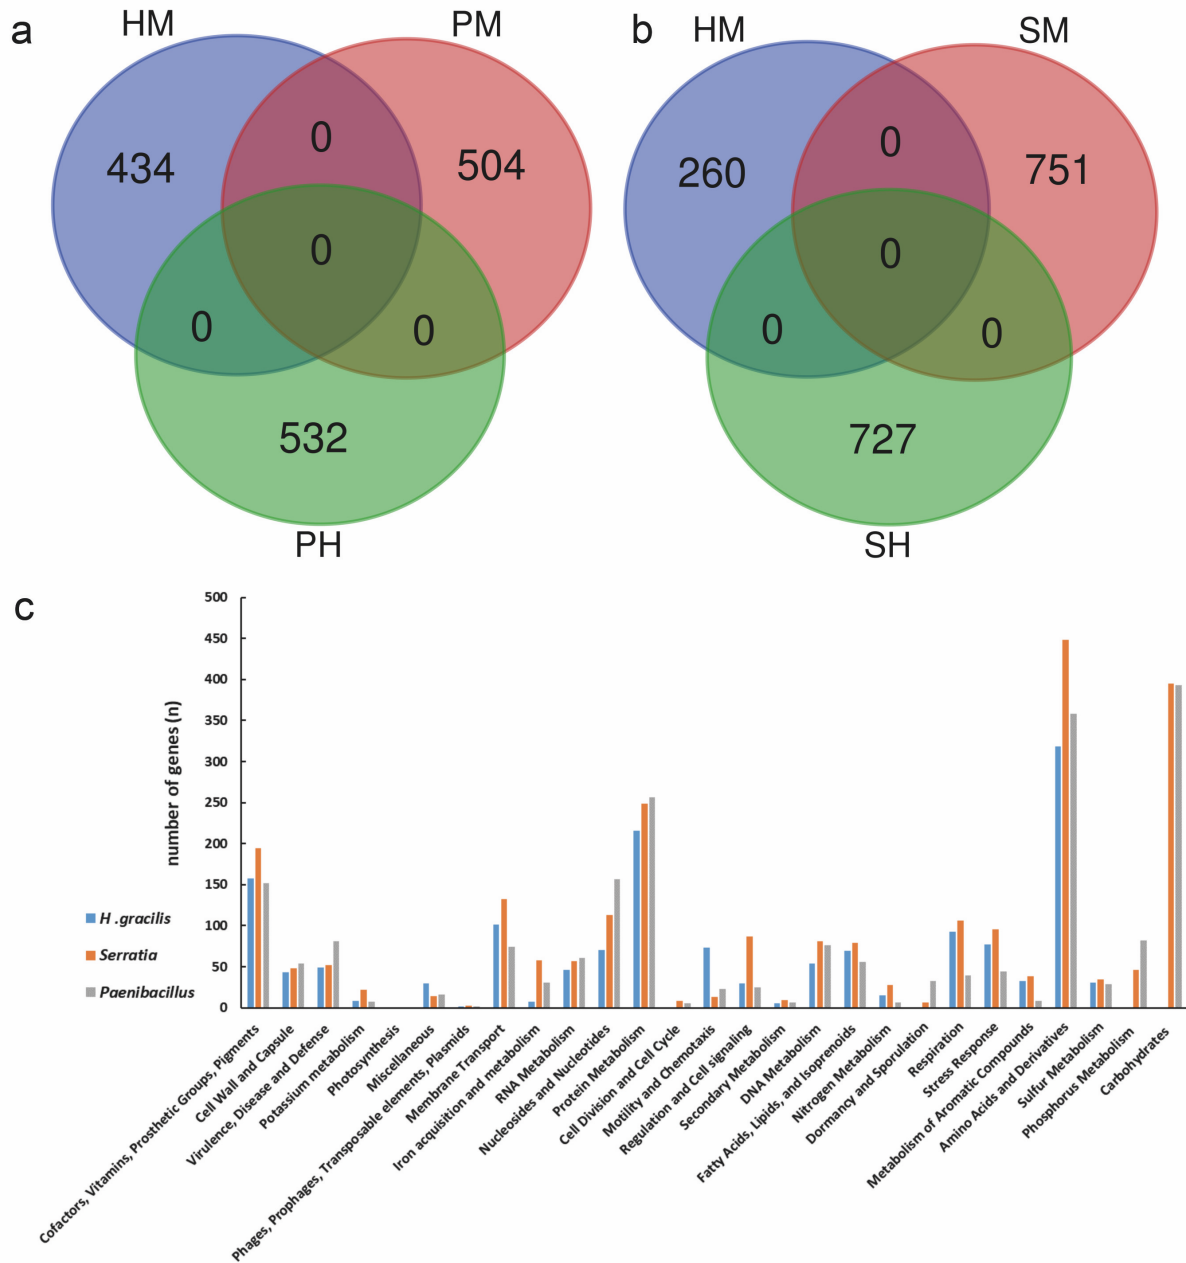

**Figure 5:** Results of the comparison analysis carried out with the RAST pipeline (<https://rast.nmpdr.org/>) (a) Venn- diagram showing the results for the number (n) of expressed genes present solely in monoculture and the number of shared expressed genes for the monocultures of *Hylemonella* (HM), *Paenibacillus* monoculture (PM) and *Serratia* monoculture (SM) and the interaction of *Hylemonella* with *Paenibacillus* (PH) and for the interaction of *Hylemonella* with *Serratia* (SH). (b) Boxplot showing number (n) of expressed genes present in each RAST subsystem category.

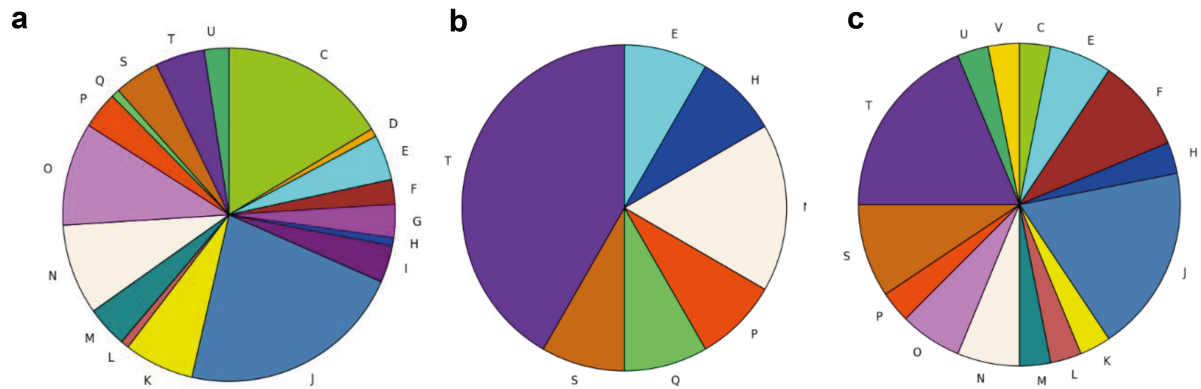

**Figure 6: Pie-charts representing up-regulated genes identified by differential gene expression analysis and COG annotation (a) *Hylemonella gracilis* monoculture gene expression level (b) *H. gracilis* in co-culture with *Paenibacillus* sp. AD87; (c) *H. gracilis* co-culture with *S. plymuthica* PRI-2C. In the co-culture of *H. gracilis* with *Paenibacillus* sp. AD87, genes related to signal transduction (T) were the category with the most differentially expressed genes. In the co-culture of *H. gracilis* with *S. plymuthica* PRI-2C genes related to signal transduction (T), translation, ribosome structure and biogenesis (J) were the most prevalent differentially expressed gene categories.**

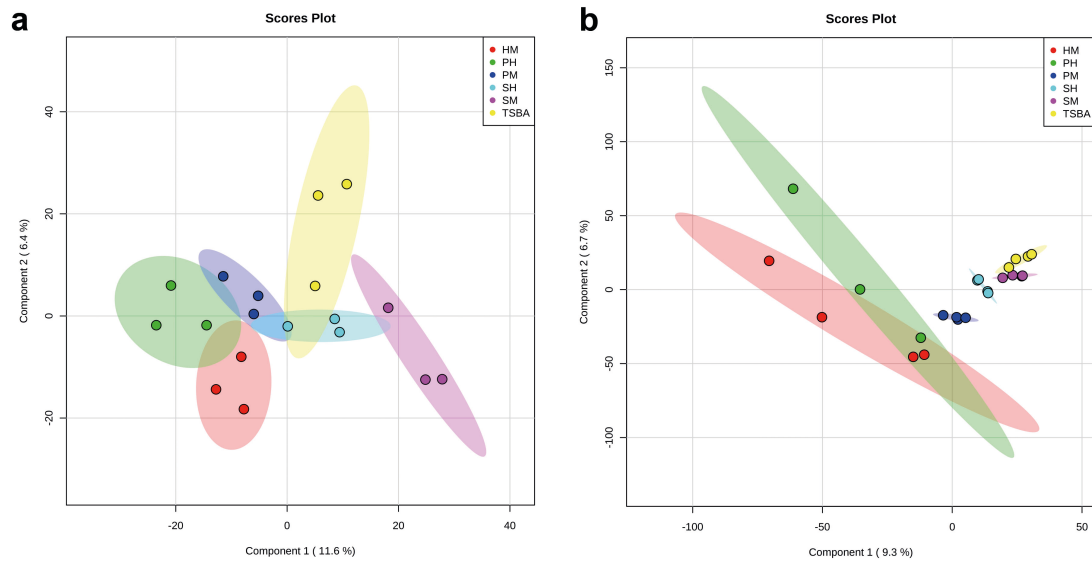

**Figure 7: PLS-DA plots of the metabolomics data (a)** PLS-DA 2D- plots of volatiles emitted by monocultures and pairwise combinations of *H. gracilis*, *Paenibacillus* and *Serratia plymuthica* after ten days of inoculation, time point (t=10 days) **(b)** PLS-DA 2D- plots of the analysed DART-MS data of monocultures and mixtures of *H. gracilis*, *Paenibacillus* sp. AD87 and *Serratia plymuthica* PRI-2C after ten days of inoculation, time point (t=10 days).



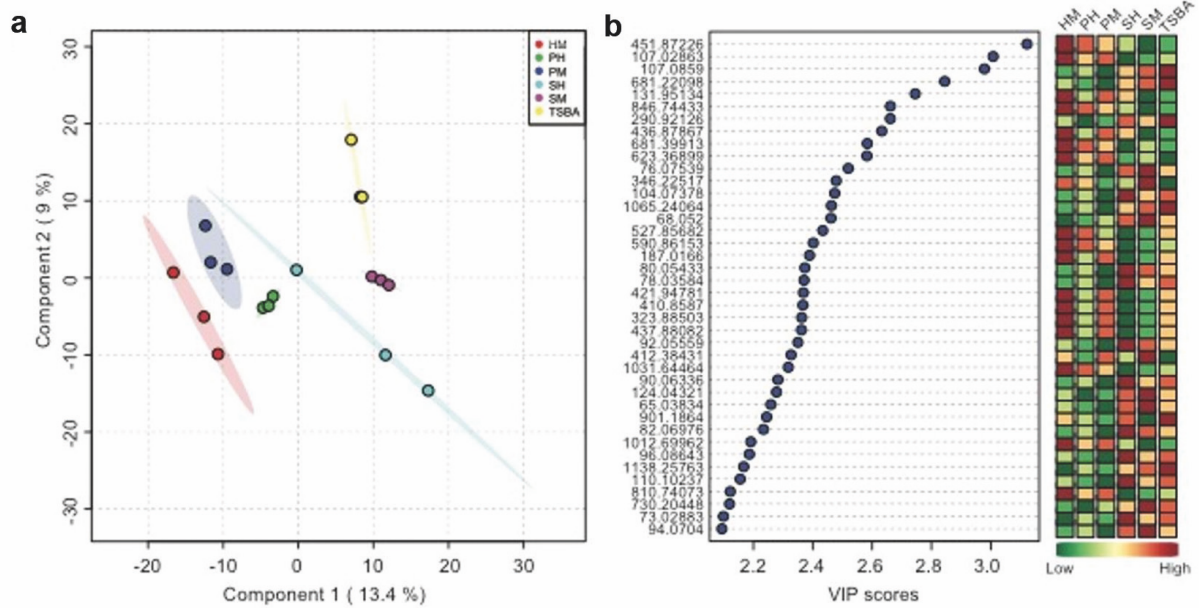

**Figure 8: PLS-DA plots of the first 40 significant mass features observed after analysis of the LAESI-MSI data. (a)** PLS-DA score plot for *H. gracilis* monoculture (HM), *Paenibacillus sp. AD87* monoculture (PM), *Paenibacillus sp. AD87 – H. gracilis* coculture (PH), *S. plymuthica* PRI-2C monoculture (SM), *S. plymuthica* PRI-2C - *H. gracilis* coculture (SH) and TSBA control (TSBA). **(b)** First 40 statistically significant features identified by PLS-DA based on Variable Importance in Projection (VIP) score. The colored boxes on the right indicate the relative concentrations of the corresponding metabolite in each group under study.
