1 **Exploring the interspecific interactions and the metabolome of the**  
2 **soil isolate *Hylemonella gracilis***

3 **Olaf Tyc<sup>1,2\*</sup>, Purva Kulkarni<sup>1,3</sup>, Adam Ossowicki<sup>1,4</sup>, Vittorio Tracanna<sup>5,6</sup>, Marnix H.**  
4 **Medema<sup>5</sup>, Peter van Baarlen<sup>7</sup>, W.F.J. van IJcken<sup>8</sup>, Koen J. F. Verhoeven<sup>9</sup> and Paolina**  
5 **Garbeva<sup>1,10</sup>**

6  
7 <sup>1</sup>Netherlands Institute of Ecology (NIOO-KNAW), Department of Microbial Ecology, PO  
8 BOX 50, 6700 AB Wageningen, Netherlands

9  
10 <sup>2</sup>Goethe University, Department of Internal Medicine I, University Hospital Frankfurt,  
11 Theodor-Stern-Kai 7, 60590 Frankfurt, Germany

12  
13 <sup>3</sup>Translational Metabolic Laboratory, Radboud University Medical Center, Geert Grooteplein  
14 zuid 10, 6525 GA Nijmegen, Netherlands

15  
16 <sup>4</sup>Institute of Biology, Above–Belowground Interactions Group, Leiden University, 2333 BE  
17 Leiden, Netherlands

18  
19 <sup>5</sup>Wageningen University, Department of Plant Sciences, Bioinformatics Group,  
20 Droevendaalsesteeg 1, 6708 PB Wageningen, Netherlands

21  
22 <sup>6</sup>University Cologne, Institut für Pflanzenwissenschaften, Zülpicher Str. 47 B  
23 50674 Köln, Germany

24  
25 <sup>7</sup>Wageningen University, Department of Animal Sciences, Host-Microbe Interactomics,  
26 Postbus 338, 6700 WD Wageningen, Netherlands

27  
28 <sup>8</sup>Center for Biomics, Erasmus University Medical Center, Building Ee, Room Ee6.79b  
29 Wytemaweg 80, 3015 CN Rotterdam Rotterdam, Netherlands

30  
31 <sup>9</sup>Netherlands Institute of Ecology (NIOO-KNAW), Department of Terrestrial Ecology, PO  
32 BOX 50, 6700 AB Wageningen, Netherlands

33  
34 <sup>10</sup>Department of Plant and Environmental Sciences, Faculty of Natural and Life Sciences,  
35 University of Copenhagen, Denmark

36  
37 **Correspondence:**

38 Goethe University, University Hospital Frankfurt, Department of Internal Medicine I,  
39 Theodor-Stern-Kai 7, 60590 Frankfurt, Germany, E-Mail: [olaf.tyc@kgu.de](mailto:olaf.tyc@kgu.de)

40  
41 **Keywords:** *Hylemonella* sp.; Interspecific interactions; Volatile-organic-compounds;  
42 Transcriptome analysis; Metabolomics; Metabolome analysis

43

44

45 **Abstract**

46 Microbial community analysis of aquatic environments showed that an important component  
47 of its microbial diversity consists of bacteria with cell sizes of ~0.1  $\mu\text{m}$ . Such small bacteria  
48 can show genomic reductions and metabolic dependencies with other bacteria. However, so  
49 far no study investigated if such bacteria exist in terrestrial environments like e.g. soil.

50

51 Here, we isolated soil bacteria that passed through a 0.1  $\mu\text{m}$  filter, by applying a novel  
52 isolation and culturing approach. The complete genome of one of the isolates was sequenced  
53 and the bacterium was identified as *Hylemonella gracilis*. A set of co-culture assays with  
54 phylogenetically distant soil bacteria with different cell and genome sizes was performed. The  
55 co-culture assays revealed that *H. gracilis* grows better when interacting with other soil  
56 bacteria like *Paenibacillus* sp. AD87 and *Serratia plymuthica*. Transcriptomics and  
57 metabolomics showed that *H. gracilis* was able to change gene expression, behavior, and  
58 biochemistry of the interacting bacteria without direct cell-cell contact.

59

60 Our study indicates that bacteria are present in the soil that can pass through a 0.1  $\mu\text{m}$  filter.  
61 These bacteria may have been overlooked in previous research on soil microbial  
62 communities. Such small bacteria, exemplified here by *H. gracilis*, are able to induce  
63 transcriptional and metabolomic changes in other bacteria upon their interactions in soil. In  
64 vitro, the studied interspecific interactions allowed utilization of growth substrates that could  
65 not be utilized by monocultures, suggesting that biochemical interactions between  
66 substantially different sized soil bacteria may contribute to the symbiosis of soil bacterial  
67 communities.

68

69

70

71

72

73

74

75

## 76 **Importance**

77 Analysis of aquatic microbial communities revealed that parts of its diversity consist of  
78 bacteria with cell sizes of  $\sim 0.1 \mu\text{m}$ . Such bacteria can show genomic reductions and metabolic  
79 dependencies with other bacteria. So far, no study investigated if such bacteria exist in  
80 terrestrial environments e.g. soil. By applying a novel isolation method, we show that such  
81 bacteria also exist in soil. The isolated bacteria was identified as *Hylemonella gracilis*.

82

83 Co-culture assays with phylogenetically different soil bacteria revealed that *H. gracilis* grows  
84 better when co-cultured with other soil bacteria. Transcriptomics and metabolomics showed  
85 that *H. gracilis* was able to change gene expression, behavior, and biochemistry of the  
86 interacting bacteria without direct contact. Our study revealed that bacteria are present in soil  
87 that can pass through  $0.1 \mu\text{m}$  filters. Such bacteria may have been overlooked in previous  
88 research on soil microbial communities and may contribute to the symbiosis of soil bacterial  
89 communities.

90

## 91 **Introduction**

92 Bacteria are ubiquitous living organisms with various cell shapes and sizes surrounding us in  
93 all environments (1, 2). Soil is the most complex habitat harboring the largest diversity and  
94 density of bacteria known to date (cell densities ranging from  $10^7$  to  $10^{10}$  cells/g of soil (3-5).  
95 Soil bacteria are part of a community where they are in constant interaction with their own  
96 and other species (6-8). Bacteria produce and release a plethora of metabolites into their  
97 environment. In this way, they not only chemically modify their niche but also affect the  
98 behavior and the secondary metabolite production of nearby bacteria (9-11). Soil bacteria are  
99 known to produce a wide range of soluble and volatile secondary metabolites with different  
100 physicochemical and biological properties (7, 12-14). In contrast to soluble compounds,  
101 volatile organic compounds (VOCs) are rather small molecules ( $< 300 \text{ Da}$ ) that can diffuse  
102 easily through air- and water-filled soil pores (15-17). These physicochemical properties  
103 make VOCs ideal metabolites for long- distance communication and interactions between soil  
104 microorganisms (18-21).

105 In aquatic environments, bacteria are naturally found at lower cell densities compared  
106 to soil ( $10^3 - 10^6$  cells/mL) (22-24). Recent studies have shown that a significant component  
107 of aquatic microbial diversity consists of bacteria with small cell sizes of about  $\sim 0.1 \mu\text{m}$  (25-  
108 27). However, little is known if bacteria with such cell sizes exist in soil environments, for  
109 instance in water-filled soil pores. One can assume that a small cell size can be an advantage

110 in challenging environments like soil. However, the distribution of microorganisms in soil is  
111 influenced by its water and moisture content, and a low soil moisture content leads to lower  
112 connectivity between soil pores, and thus to a lower number of accessible micro-habitats.

113 Small bacterial cell size is often linked to a small genome size caused by genome  
114 streamlining (28). Recent metagenomics studies suggest that genome streamlining is  
115 ubiquitous in bacteria (29, 30). In some cases, the primary metabolism of one organism can be  
116 directly built on the primary metabolism of another organism, known as syntrophic  
117 relationships (31, 32). The Black Queen Hypothesis states that genome-streamlined  
118 organisms have an evolutionary advantage because of the loss of genes whose function can be  
119 replaced by bacteria in the surrounding environment, effectively conserving energy (33).  
120 Since bacteria with fewer genes have less adaptive capacity compared to bacteria with more  
121 genes, many of them are expected to depend on specific environmental conditions or on the  
122 presence of other specific organisms (34) to produce metabolites that support their  
123 persistence.

124 Here, we aimed to explore if bacteria that are able to pass through 0.1  $\mu\text{m}$  filters are  
125 present in soil, and if such bacteria are cultivable. We further investigated their interaction  
126 with phylogenetically different bacteria commonly occurring in soil. The major research  
127 questions were if, and how inter-specific interactions between bacteria that pass a 0.1  $\mu\text{m}$   
128 filter and other common soil bacteria that cannot pass 0.1  $\mu\text{m}$  filters affected their fitness,  
129 behavior, gene expression, and the production of secondary metabolites.

130

## 131 **Materials and Methods**

### 132 **Isolation and identification of bacteria that pass through 0.1 $\mu\text{m}$ filters**

#### 133 **Isolation of *H. gracilis* from soil**

134 After removing the grassland vegetation, a topsoil core was collected and mixed, a sample of  
135 10 g was suspended in 90 ml of 10 mM Phosphate-buffer (pH 6.5) and shaken with gravel (2-  
136 4 mm) at 250 rpm for 45 min. The extract was filtered through sterile gauze pads and  
137 subsequently through sterile Whatmann 1mm paper filter using Buchner funnel. Purified  
138 extract was filtered again through a syringe filter 0.2  $\mu\text{m}$  and afterwards through 0.1  $\mu\text{m}$  filter  
139 (GE-Healthcare). The filtered extract was plated on 1/10th TSBA plates immediately after  
140 isolation and incubated at 25 °C (**Supplementary Figure 1**). The plates were inspected daily  
141 using a stereomicroscope (Leica M205C) screening for bacteria colonies.

#### 142 **Bacteria and culture conditions**



143 The bacterial strains used in this study are the Gram-negative strain *S. plymuthica* PRI-2C  
144 (gamma-Proteobacteria) (35), the Gram-positive strain *Paenibacillus* sp. AD87 (Firmicutes)  
145 (10, 36, 37) and the Gram-negative *H. gracilis* isolate NS1 (beta-Proteobacteria). The  
146 bacterial isolates were pre-cultured from -80 °C glycerol stocks on 1/10<sup>th</sup> TSBA (38) or on  
147 LB-A plates (*H. gracilis*) (LB-Medium Lennox, Carl Roth GmbH + Co. KG, 20 gL<sup>-1</sup> Bacto  
148 Agar) and incubated at 24 °C prior application. All bacterial isolates are listed in  
149 **Supplementary Table 1.**

150

### 151 **Identification of *H. gracilis***

152 For the identification of *H. gracilis* 16S rRNA PCR was performed from grown colonies in a  
153 50 µl PCR- GoTaq™ green master mix (Promega Corp. Madison, USA cat# M712). For 16S  
154 rRNA gene amplification the following primers were used: forward primer 27f (5'- AGA  
155 GTTT GAT CMT GGC TCAG -3'), reverse primer 1492r (5'- GRT ACC TTG TTA CGA  
156 CTT -3'), amplifying ~1465 bp from the 16S rRNA gene (39, 40) (modified). All PCR  
157 reactions were performed on a BIO-RAD C1000 Touch™ PCR machine (BIO-RAD,  
158 Veenendaal, the Netherlands) with these settings: initial cycle 95 °C for 3 min. and 30 cycles  
159 of 94 °C for 30 sec., 55 °C for 45 sec. and 72 °C for 1 min. and final extension at 72 °C for 5  
160 minutes. The PCR products were purified using the Qiagen PCR purification kit and sent to  
161 MACROGEN (MACROGEN Europe, Amsterdam, the Netherlands for 16S rRNA  
162 sequencing.

163

### 164 **Microscopy**

165 Microscopy pictures of *H. gracilis* cells were taken at 400-fold magnification with an Axio  
166 Imager M1 microscope (Carl Zeiss, Germany) under phase-contrast illumination with an  
167 AxioCam MRm camera. Macroscopic colony pictures of *H. gracilis* were taken with an  
168 OLYMPUS Binocular at 20 X magnification. Images were analyzed with AXIO VISION v4.7  
169 (Carl Zeiss Imaging Solutions GmbH, Germany).

170

### 171 **Bacterial interactions assays**

172 After four-days of pre-culture, a single colony of *Paenibacillus* sp. AD87 and *S. plymuthica*  
173 PRI-2C and *H. gracilis* was picked and inoculated in 20 mL 1/10<sup>th</sup> TSB (*Paenibacillus* sp.  
174 AD87 and *S. plymuthica* PRI-2C) and grown overnight at 24 °C at 220 rpm. For the  
175 inoculation of *H. gracilis* a single colony was picked from a TSBA plate and inoculated in 20  
176 mL LB-medium and grown for 3 days at 24 °C, 200 rpm. For the interaction assay an

177 inoculation mix of each bacterial strain (*Paenibacillus* sp. AD87, *S. plymuthica* PRI-2C, *H.*  
178 *gracilis*) was prepared by diluting the bacterial isolates in 20 mL of 10 mM Phosphate-buffer  
179 (pH 6.5) to an OD<sub>600</sub> of 0.005 (*Paenibacillus* sp. AD87 and *S. plymuthica* PRI-2C) or to an  
180 OD<sub>600</sub> of 0.05 (*H. gracilis*), which corresponds to 10<sup>5</sup> CFU/mL. A droplet of 10 µl was  
181 added in the middle of a 6 cm diameter Petri dish (monocultures) or next to each other in a  
182 distance of ~0.5 cm (pairwise interactions). All treatments were performed in triplicates on  
183 1/10<sup>th</sup> TSBA plates incubated at 24 °C. After the growth time of 3 days the bacteria were  
184 scratched and washed from the plates by using sterile cell scratchers and Phosphate buffer.  
185 For the enumeration of the cell counts (CFU/mL) dilution series of the scratched bacteria  
186 were prepared and plated in triplicates on 1/10<sup>th</sup> TSBA plates and grown for 48 hours.  
187 Enumeration was carried out on an aCOlyte Colony Counter (Don Whitley Scientific,  
188 Meintrup DWS Laborgeräte GmbH, Germany).

189

#### 190 **Enumeration of growth inhibitory or growth promoting effects of cell-free supernatants** 191 **of *Paenibacillus* sp. AD87 and *S. plymuthica* PRI-2C on the growth of *H. gracilis***

192 A bacterial growth assay in liquid media supplemented with cell-free supernatants (CFS) of  
193 *Paenibacillus* sp. AD87 and *S. plymuthica* PRI-2C was conducted. For the assay single  
194 colonies of *Paenibacillus* sp. AD87, *S. plymuthica* PRI-2C and *H. gracilis* were inoculated in  
195 20 mL 1/10<sup>th</sup> TSB (*Paenibacillus* sp. AD87 and *S. plymuthica* PRI-2C) or in 20 mL LB-  
196 medium (*H. gracilis*) and grown overnight at 24 °C, 220 rpm or for three days (*H. gracilis*).  
197 For the preparation of *Paenibacillus* sp. AD87 and *S. plymuthica* PRI-2C cell-free supernatant  
198 (CFS) the grown cultures were centrifuged at 5000 rpm for 20 minutes (at room temperature)  
199 and filtered through 0.2 µm filters (GE Healthcare). For the assay, *H. gracilis* was inoculated  
200 into 20 mL liquid LB- media at an OD<sub>600</sub> of 0.05. The growth media was then supplemented  
201 either with 20 % (v/v) CFS of *Paenibacillus* sp. AD87 or *S. plymuthica* PRI-2C or with 20 %  
202 (v/v) of filter sterilized liquid 1/10<sup>th</sup> TSB media (control). The cultures were incubated at 24  
203 °C at 220 rpm for 7 days and the bacterial growth was monitored by optical density  
204 (absorbance at 600nm) measurements and by plate counting. After five days of growth, the  
205 CFU/ml of *H. gracilis* grown in presence of CFS of *Paenibacillus* sp. AD87 or *S. plymuthica*  
206 PRI-2C were enumerated by plate counting. For this, the cultures were sampled and dilution  
207 series were prepared in triplicates and a volume of 100 µl of each serial dilution was plated in  
208 three replicates with a disposable Drigalski spatula on 1/10<sup>th</sup> TSBA plates. CFU Enumeration  
209 was carried out on an aCOlyte Colony Counter (Don Whitley Scientific, Meintrup DWS  
210 Laborgeräte GmbH, Germany).

## 211 **DNA isolation and genome sequencing of *H. gracilis***

212 Genomic DNA of *H. gracilis* was extracted using a QIAGEN Genomic-tip 500/G DNA kit  
213 Qiagen, cat# 10262 . Genome sequencing was performed on the PacBio RS II platform  
214 (Pacific Biosciences, Menlo Park, CA, USA) using P6-C4 chemistry at the Institute for  
215 Genome Sciences (IGS), Baltimore, Maryland, USA. The sequencing resulted in a total of  
216 70,101 reads with N50 of 17 309 nucleotides. The PacBio raw sequences were analyzed using  
217 SMRT portal V2.3.0.140936 p.4150482. Sequences were assembled *de novo* with the  
218 RS\_HGAP\_assembly 3 software (Pacific Biosciences, Menlo Park, CA, USA) with default  
219 settings on an estimated genome size of 3.8 Mbp. The resulting assemblies were subjected to  
220 scaffolding using the RS\_AHA\_scaffolding 1 software. The genome assembly properties are  
221 shown in **Table 1**. Final contigs were annotated using PROKKA V1.11 (41) and InterproScan  
222 5.16 55.0 (42). The whole genome sequence was submitted as *Hylemonella gracilis* strain  
223 NS1 to NCBI GenBank (<https://www.ncbi.nlm.nih.gov/genbank/>) under accession #  
224 CP031395.

225

## 226 ***In silico* analysis of secondary metabolite gene clusters**

227 For *in silico* analysis of secondary metabolite gene clusters, the genome sequences of *H.*  
228 *gracilis*, *Paenibacillus* sp. AD87 and *S. plymuthica* PRI-2C were submitted to the  
229 antiSMASH web server (<http://antismash.secondarymetabolites.org/>) version 4.0 (43).

## 230 **RNA isolation and sequencing**

231 Sampling for total RNA extractions was performed in triplicates after five and ten days of  
232 incubation on bacteria grown on 1/10<sup>th</sup> TSBA plates either in co-culture or monoculture as  
233 described previously (Bacterial interactions assays on 1/10th TSBA plates). For the isolation  
234 of bacterial cell material a volume of 1 mL of 10 mM phosphate buffer (pH 6.5) was added to  
235 the surface of the 1/10<sup>th</sup> TSBA plates and grown bacterial cells were suspended from the plate  
236 surface with a disposable cell scratcher (VWR international B.V., the Netherlands). For total  
237 RNA extraction the obtained cell suspension was transferred to a tube containing RNA  
238 Protect Bacteria Reagent (Qiagen, cat# 76506) and centrifuged for 20 min. at 20,000g, 4 °C.  
239 The supernatant was discarded and the resulting cell pellets were stored at -80 °C. Total RNA  
240 was extracted using the Aurum Total RNA Mini Kit (BIO-RAD) according to the  
241 manufacturer's protocol. Samples were treated with TURBO DNA free Kit (AMBION)  
242 according to the manufacturer's protocol. The RNA concentration and quality was checked on  
243 a NanoDrop Spectrophotometer (ND 2000, Thermo Fisher Scientific, the Netherlands) and on  
244 a 1.0 % TBE agarose gel. Samples were subjected to RNA sequencing at the Erasmus Center

245 for Biomics ([www.biomics.nl](http://www.biomics.nl)), Erasmus MC, Rotterdam, The Netherlands using the Illumina  
246 HiSeq 2500 sequencing platform. The obtained reads were checked for quality using Fastq.  
247 For the estimation of the transcripts, the filtered sequences were aligned against the cDNA  
248 sequences of *H. gracilis*, *Paenibacillus* sp. AD87 and *S. plymuthica* PRI-2C using Bowtie 2  
249 (2.2.5) (44) with the following settings: -- no-mixed -- no-discordant -- gbar 1000 – end-to-  
250 end. Transcript abundance was calculated using RSEM V1.1.26 (45) and differential  
251 expression between the treatments was calculated using edgeR V3.2 package in the R  
252 environment (46-48).

253

### 254 **Pathway annotations**

255 Please see Supplementary Methods.

256

### 257 **Exploration of missing genes and genome streamlining in *Hylemonella***

258 RAST annotations of *S. plymuthica* PRI-2C, *Paenibacillus* sp. AD87 and *H. gracilis* were  
259 used to compare their genomes and to explore the genomes for missing genes in metabolic  
260 pathways (<http://rast.nmpdr.org>) (49-51). The missing gene sequences were extracted and  
261 assigned with KEGG Orthology (52, 53). Presence/absence of genes belonging to metabolic  
262 pathways was compared across the three genomes to identify shared genes and pathways and  
263 to determine incomplete metabolic pathways in *H. gracilis*.

264

### 265 **Catabolic profiling**

266 To determine the carbon source usage abilities of *H. gracilis* and *Paenibacillus* sp. AD87 and  
267 *S. plymuthica* PRI-2C strains, Biolog EcoPlate (Labconsult S.A.- N.V., Bruxelles, Belgium)  
268 assays were performed (54, 55). Bacteria were cultured in monoculture or in co-culture in  
269 single wells of the Biolog EcoPlate™. A, single colony of each bacterial strain was picked  
270 and inoculated in 15 mL 1/10<sup>th</sup> TSB or 15 mL LB- liquid media. Bacteria were grown  
271 overnight (*Paenibacillus* sp. AD87 and *S. plymuthica* PRI-2C) or for two days (*H. gracilis*) at  
272 24 °C at 250 rpm. Grown bacteria cultures were washed twice by centrifugation at 4.500 rpm  
273 for 15 minutes at room temperature, the supernatant discarded and the pellet was washed and  
274 re-suspended in 5 mL of 10 mM phosphate buffer. The re-suspended cultures were diluted to  
275 an OD<sub>600</sub> of 0.005 in 20 mL of 10 mM phosphate buffer either in monoculture or in co-  
276 culture. For the experiment Biolog EcoPlate™ were inoculated with 100 µl of each bacterial  
277 inoculation suspension (monocultures or co-cultures) in each well. For each bacterial  
278 monoculture one Biolog EcoPlate™ was inoculated, as well for each co-cultivation pair (*S.*

279 *plymuthica* PRI-2C with *H. gracilis* and *Paenibacillus* sp. AD87 with *H. gracilis*). Plates were  
280 incubated for 1 week and absorbance was measured at 590 nm every 24 hours on a BIOTEK  
281 plate reader to determine the ability of the bacterial cultures to use the carbon sources present  
282 in the wells.

283

#### 284 **Trapping of volatile organic compounds and GC-Q-TOF analysis**

285 Please see Supplementary Methods.

286

#### 287 **Ambient mass-spectrometry imaging LAESI-MS data analysis**

288 For LAESI-MS analysis a single colony of each bacterial isolate was picked and inoculated in  
289 20 mL 1/10<sup>th</sup> TSB (*Paenibacillus* sp. AD87 and *S. plymuthica* PRI-2C) and grown overnight  
290 at 24 °C at 220 rpm. For the inoculation of *H. gracilis* a single colony was picked from plate  
291 and inoculated in 20 mL LB-medium and grown for three days at 24 °C at 200 rpm. The  
292 inoculation mix was prepared by diluting the bacterial isolates in 20 mL of 10 mM Phosphate-  
293 buffer (pH 6.5) to an OD<sub>600</sub> of 0.005. The inoculum mix was pulse- vortexed for 30 sec. and a  
294 droplet of 10 µl was added in the middle of a 6 cm diameter Petri dish (monocultures) or next  
295 to each other in a distance of approx. 0.5 cm (pairwise interactions). All treatments were  
296 inoculated in triplicates on 1/10<sup>th</sup> TSBA and incubated at 24 °C for five and ten days. After  
297 five and ten days of incubation bacterial colonies were cut out of the agar (size approximately  
298 1 – 3 cm<sup>2</sup>) and subjected to LAESI-MS measurement. The LAESI-MS analysis was carried  
299 out on a Protea Biosciences DP-1000 LAESI system (Protea Bioscience Inc., Morgantown,  
300 WV, USA) coupled to a Waters model Synapt G2S (Waters Corporation, Milford, MA, USA)  
301 mass spectrometer. The LAESI system was equipped with a 2940-nm mid-infrared laser  
302 yielding a spot size of 100 µm. The laser was set to fire 10 times per x-y location (spot) at a  
303 frequency of 10 Hz and 100% output energy. A syringe pump was delivering the solvent  
304 mixture of methanol/water/formic-acid (50:50:0.1% v/v) at 2 µL/min to a PicoTip (5cm x 100  
305 µm diameter) stainless steel nanospray emitter operating in positive ion mode at 4000 V. The  
306 LAESI was operated using LAESI Desktop Software V2.0.1.3 (Protea Biosciences Inc.,  
307 Morgantown, WV, USA). The Time of Flight (TOF) mass analyzer of the Synapt G2S was  
308 operated in the V-reflectron mode at a mass resolution of 18.000 to 20.000. The source  
309 temperature was 150 °C, and the sampling cone voltage was 30 V. The positive ions were  
310 acquired in a mass range of 50 to 1200 *m/z*. The MS data was lock mass corrected post data  
311 acquisition using leucine enkephalin (C<sub>25</sub>H<sub>37</sub>N<sub>5</sub>O<sub>7</sub> *m/z*= 556.2771), which was used as an  
312 internal standard. All the acquired Waters \*.RAW data files were converted to open file



313 format \*.imzML using an in-house script written in R. Later, this data was pre-processed in  
314 multiple steps to remove noise and to make the data comparable. First, square root  
315 transformation was applied to the data to stabilize the variance. Then, baseline correction was  
316 performed to enhance the contrast of peaks to the baseline. For better comparison of intensity  
317 values and to remove small batch effects, Total-Ion-Current (TIC)-based normalization was  
318 applied. This was followed by spectral alignment and peak detection to extract a list of  
319 significant mass features for each sample replicate per treatment. In the end, a mass feature  
320 matrix was generated with sample replicates for each treatment in columns and mass features  
321 in rows. This feature matrix was used to perform further statistical analysis. The pre-  
322 processing and peak-detection steps were applied using R scripts developed in-house and  
323 using functions available within the MALDIquant R package (56). To perform multivariate  
324 analysis, the feature matrix was imported into the online version of Metaboanalyst 4.0 (57).  
325 Ion intensity maps displaying the spatial distribution for statistically significant mass features  
326 were created using R. Before generating the ion maps, the intensity values for the selected  
327 mass features were normalized to the maximum intensity within the image, measured for each  
328 mass value individually. Venn diagrams displaying unique and common masses amongst  
329 different treatments were drawn using the jvenn tool (58).

330

## 331 **Results**

### 332 **Isolation and identification of bacteria that pass through 0.1 $\mu$ M filter**

333 Using a novel bacterial isolation and culture approach, we isolated bacteria from a terrestrial  
334 soil sample that were able to pass through 0.22  $\mu$ m and 0.1  $\mu$ m pore-size filters. After several  
335 days of incubation, only one type of bacterial colonies was observed on the inoculated plates.  
336 The grown colonies were identified as *Hylemonella gracilis* (Gram-negative, class  
337 betaproteobacteria, order Burkholderiales) by 16S rRNA sequence analysis.  
338 The colonies showed a round and colorless morphology when grown on 1/10<sup>th</sup> TSBA plates  
339 (**Fig. 1a**). Microscopically the bacteria had a spiraled morphology with a length of  
340 approximately 6 - 12  $\mu$ m, which is typical for *Hylemonella* species (**Fig. 1b**).

341

### 342 ***Hylemonella* grows better in interaction with other bacteria**

343 To test the hypothesis that small bacteria grow better in presence of normal-sized bacteria,  
344 growth of *H. gracilis* was determined in co-culture with two phylogenetically distantly related  
345 soil bacteria (*Paenibacillus* sp. AD87 and *S. plymuthica* PRI-2C) and compared to that of the  
346 monoculture. The bacterial colony forming units of *H. gracilis* (CFU/mL) obtained on 1/10<sup>th</sup>

347 TSBA plates from monocultures and co-cultures are summarized in **Fig. 2**. Cell counts of  
348 *Paenibacillus* sp. AD87 were  $7.68 \times 10^7$  CFU/mL in co-culture with *H. gracilis* (**Fig. 2a**).  
349 During the interaction with *H. gracilis*, the growth of *S. plymuthica* was significantly  
350 negatively affected ( $P=0.037$ ) after five days of incubation by reaching  $1.47 \times 10^9$  CFU/mL  
351 compared to the monocultures (**Fig. 2a**).

352 The bacterial colony forming units (CFU) obtained from *H. gracilis* grown in presence of cell  
353 free supernatants (CFS) of *Paenibacillus* sp. AD87 and of *S. plymuthica* are summarized in  
354 **Fig. 2b**. *H. gracilis* growth was significantly increased ( $P=0.011$ ) when growing in presence  
355 of cell free supernatants of *Paenibacillus* sp. AD87 resulting in higher *H. gracilis* cell counts  
356 compared to the monoculture by reaching  $1.10 \times 10^6$  CFU/mL. In the presence of cell free  
357 supernatant from *S. plymuthica* PRI-2C, *H. gracilis* reached the highest cell counts at  $1.72 \times$   
358  $10^6$  CFU/mL ( $P=0.000$ ) after five days of incubation (**Fig. 2b**).

359

### 360 **Interspecific interaction between bacterial species allows use of additional substrates**

361 During physiological or catabolic profiling, the metabolism of 31 carbon sources during  
362 bacterial growth are measured in 96-wells plates. The catabolic profiling assays revealed that  
363 *Paenibacillus* sp. AD87 was able to utilize 11 out of the 31 carbon sources in monoculture,  
364 while *S. plymuthica* PRI-2C and *H. gracilis* were able to utilize 17 and 16 carbon sources,  
365 respectively. Interestingly, three compounds could be utilized only during the co-cultivation  
366 of *H. gracilis* with one of the other species, these compounds could not be utilized by any of  
367 the species in monoculture. Specifically, alpha- cyclodextrin was utilized only during the co-  
368 cultivation of *H. gracilis* with *Paenibacillus* sp. AD87, while L-threonine and glycyl-L-  
369 glutamic acid were utilized only during the co-cultivation of *S. plymuthica* PRI-2C and *H.*  
370 *gracilis* (**Fig. 3**).

371

### 372 **Genomic features of *H. gracilis*, *S. plymuthica* PRI-2C and *Paenibacillus* sp. AD87**

373 Sequencing of the complete genome of *H. gracilis* resulted in a genome size of 3.82 Mbp with  
374 3,648 coding sequences (CDS). As expected, the genome analysis revealed that the genome of  
375 *H. gracilis* is smaller and contains fewer genes compared to *S. plymuthica* PRI-2C (5.4 Mbp)  
376 and *Paenibacillus* sp. AD87 (7.0 Mbp). The genome features of all three bacteria are  
377 summarized in **Table 1**.

378

379

380



### 381 ***In silico* analysis of gene clusters encoding for secondary metabolites**

382 The *in silico* tool *antiSMASH* allows the rapid genome-wide identification, annotation and  
383 analysis of secondary metabolite biosynthesis gene clusters in bacterial and fungal genomes  
384 (59). *In silico* analysis of *Paenibacillus* sp. AD87 revealed a total of 10 gene clusters coding  
385 for secondary metabolites. From which two gene clusters encode pathways for producing  
386 terpenes, one for bacteriocins, one for lasso peptides, two for lanthipeptides, one for  
387 nonribosomal peptides (NRPs), one for others, one for polyketides (type III enzyme  
388 mechanism) and one gene cluster for non-NRP Siderophores (**Fig. 4a**). For *S. plymuthica*  
389 PRI-2C, nine gene clusters, were found of which two gene clusters were annotated to encode  
390 the production of NRPs, one of homoserine lactones, one of aryl polyenes and/or non-NRP  
391 Siderophores, one of hybrid polyketide-NRP metabolites, one of thiopeptides, one of  
392 butyrolactones, one of terpenes and one of others (**Fig. 4b**). For *H. gracilis* the AntiSMASH  
393 analysis revealed that *H. gracilis* possesses relatively few gene clusters related to secondary  
394 metabolism. A total of three gene clusters for *H. gracilis* were detected, of which one  
395 belonged to the class of bacteriocins, one to the class of terpenes, and one to aryl polyenes,  
396 the latter being a homolog to the aryl polyene gene cluster from *Xenorhabdus doucetiae*  
397 (Genbank: NZ\_FO704550.1) (**Fig. 4c**)

### 398 399 **Pathway analysis in *H. gracilis* compared to *S. plymuthica* PRI-2C and *Paenibacillus* sp. 400 AD87**

401 For annotation and Pathway analysis RAST (Rapid Annotation using Subsystem Technology)  
402 and OrthoFinder were used. The RAST comparison of *Paenibacillus* sp. AD87 and *H.*  
403 *gracilis* revealed 504 unique enzymes (according to their EC numbers) exclusive for  
404 *Paenibacillus* sp. AD87, while 434 were present only in *H. gracilis* and 532 EC numbers  
405 were shared by both genomes (**Fig. 5a**). The RAST comparison of *S. plymuthica* PRI-2C and  
406 *H. gracilis* revealed that 751 enzymes were present only in *S. plymuthica* PRI-2C, and 260  
407 were present only in *H. gracilis*. 727 EC numbers participating in diverse metabolic pathways  
408 were found in both genomes (**Fig. 5b**).

409 The missing genes and pathways found by OrthoFinder and EggNOG were annotated with  
410 GO terms. The analysis revealed that five genes related to metabolic pathways were absent in  
411 *H. gracilis*. Those missing genes were annotated with the following molecular function  
412 ontology terms: GO:0008473 (ornithine cyclodeaminase activity), GO:0008696 (4-amino-4-  
413 deoxychorismatelyase activity), GO:0003920 (GMP reductase activity), GO:0004035  
414 (alkaline phosphatase activity) and GO:0008442 (3-hydroxyisobutyrate dehydrogenase). We

415 verified if the absence of these molecular functions would render specific pathways obsolete  
416 or unavailable in *H. gracilis*. However, alternative pathways routes are present for these genes  
417 encoding certain molecular functions according to KEGG database annotations. The pathway  
418 analysis by RAST did not reveal the absence of essential genes in *H. gracilis*. Still, the  
419 comparison of the number (n) of genes present in each bacteria revealed major differences in  
420 several pathways, specifically in the categories "Carbohydrates metabolism" and "Phosphorus  
421 metabolism" (**Fig. 5b**). Interestingly, *H. gracilis* possesses no genes for those categories  
422 according to RAST, whereas *Paenibacillus* sp. AD87 possesses 393 and 82 genes, and *S.*  
423 *plymuthica* PRI-2C 395 and 46 genes, respectively. A major difference in the absolute  
424 number of genes in a category is also observed for Amino Acids and Derivatives, for which  
425 *H. gracilis* possesses 318 genes, *Paenibacillus* sp. AD87 possesses 358 and *S. plymuthica*  
426 PRI-2C 448 genes.

427

#### 428 **Effect of interspecific interactions on gene expression**

429 The Transcriptome analysis of monocultures and co-cultures revealed a total of 277  
430 significant differentially expressed genes; where from a total of 100 genes were down-  
431 regulated and 177 genes were up-regulated between the different treatments (**Table 2**).

432

#### 433 *Effect of inter-specific interactions on gene expression in Paenibacillus* sp. AD87 and *H.* 434 *gracilis*

435 Genes related signal transduction (T) were the category with the most differentially expressed  
436 genes during the co-cultivation of *H. gracilis* with *Paenibacillus* sp. AD87 compared to the  
437 monoculture of *H. gracilis* (**Supplementary Table 7 and 8, Fig. 6a, b**).

438 In *Paenibacillus* sp. AD87 histidine biosynthesis and dephosphorylation genes were up-  
439 regulated (**Supplementary Table 2**), while cellular-growth-related genes were down-  
440 regulated (**Supplementary Table 2**) at day 10 of the interaction with *H. gracilis* (**Fig. 6b**).

441 For the interaction of *H. gracilis* with *Paenibacillus* sp. AD87 15 significant differentially  
442 expressed genes were found (0 at day five and 15 at day ten). At day five, genes related to  
443 sulfur assimilation, chemotaxis and response to (chemical/external) stimuli were upregulated  
444 in *H. gracilis* in the presence of *Paenibacillus* sp. AD87.

445

#### 446 *Effect of inter-specific interactions on gene expression S. plymuthica* PRI-2C and *H. gracilis*

447 During the interaction of *S. plymuthica* PRI-2C with *H. gracilis*, 61 genes were significantly  
448 differentially expressed at day five and 10 at day ten. At day five, iron-sulfur cluster-

449 assembly-related genes, a sulfur transferase and a transaminase were up-regulated, while  
450 genes related to inorganic diphosphatase activity, exonuclease activity and DNA repair were  
451 downregulated. At day ten, genes related to sulfur transmembrane transport, sulfur compound  
452 catabolism and cysteine biosynthesis were upregulated, and genes related to sulfur compound  
453 metabolism and translation were downregulated. (**Supplementary Table 3 and 4**). For *S.*  
454 *plymuthica* PRI-2C, genes related to signal transduction and translation, ribosome structure  
455 and biogenesis were the most differentially expressed gene categories (**Fig. 6c**). For *H.*  
456 *gracilis* in interaction with *S. plymuthica* PRI-2C, 182 differentially expressed genes were  
457 identified at day ten and only one at day five. At day five, genes related to the  
458 ribosome/ribonucleoproteins, organelle organization/assembly and (iron)-sulfur cluster  
459 assembly were upregulated and genes related to the innate immune response (Toll Like  
460 Receptor signalling) were downregulated (**Supplementary Table 5 and 6**). At day ten, genes  
461 related to signal transduction and chemotaxis were upregulated in *H. gracilis*. For *H. gracilis*,  
462 the most upregulated genes were linked to chemotaxis pathway and iron scavenging,  
463 suggesting activity in competition (**Fig. 6a**).

464

#### 465 **Metabolomic analysis of volatile compounds**

466 The volatile blend composition of the monocultures differed from that of the co-cultures.  
467 Clear separations between the controls, monocultures and co-cultures were obtained in PLS-  
468 DA score plots (**Fig. 7a**). The analysis revealed a total of 25 volatile organic compounds  
469 produced by mono- and co-cultured bacteria that were not detected in the non-inoculated  
470 controls (**Table 3**). Of these, 17 were identified and categorized in six chemical classes  
471 (alkenes, benzoids, sulfides, thiocyanates, terpenes, furans). The remaining eight compounds  
472 could not be assigned with certainty to a known compound. The most abundant volatile  
473 organic compounds were sulfur-containing compounds such as dimethyl disulfide (C<sub>2</sub>H<sub>6</sub>S<sub>2</sub>)  
474 and dimethyl trisulfide (C<sub>2</sub>H<sub>6</sub>S<sub>3</sub>). These two sulfur compounds were produced by all three  
475 bacteria. Interestingly an unknown compound with a retention time (RT) of 26.4 min  
476 produced by the monocultures of *H. gracilis* was not detected in the interactions with *S.*  
477 *plymuthica* PRI-2C (**Table 3**). Two other unknown compounds with RT 4.15 min and with  
478 RT 24.34 min produced by the monocultures of *Paenibacillus* sp. AD87 were not detected in  
479 the co-cultivation with *H. gracilis* (**Table 3**).

480

481

482

### 483 **DART-MS based metabolomics**

484 Metabolomics analysis based on DART-MS revealed separations between the controls,  
485 monocultures, and co-cultures as presented in PLS-DA score plots (**Fig. 7b**). The  
486 metabolomic composition of the monocultures differed from that of the co-cultures (**Fig. 7b**).  
487 Statistical analysis (ONE-WAY ANOVA and post-hoc TUKEY HSD-test) revealed 617  
488 significant mass features present on day five and day ten of which 48 could be tentatively  
489 assigned to specific compounds. Most of the significant peaks were found in the co-cultures  
490 of *H. gracilis* with *Paenibacillus* sp. AD87. The significant mass features and the  
491 corresponding tentative metabolites can be found in **Supplementary Table 10**.

492

### 493 **Mass spectrometry imaging metabolomics**

494 LAESI-MSI was performed to visualize the localization of metabolites in their native  
495 environments in monoculture as well as during interaction without performing any extraction.  
496 Across all treatments, clear separation was observed amongst the samples for controls,  
497 monocultures and interactions (**Fig. 8a**). An average of 1050 mass features was detected per  
498 treatment. To list mass features that could explain separation amongst the controls,  
499 monocultures and interactions, values of variable importance in projection (VIP) were  
500 calculated. The top 40 statistically significant mass features with VIP scores > 2.0 are shown  
501 in **Fig. 8b**. The box-and-whisker plots for the four statistically significant differentially  
502 abundant metabolites selected from the volcano plot for the pair HM and PH are shown in  
503 **Supplementary Figure 2a**. To visualize the statistically significant mass features between  
504 monocultures and co-cultures samples in a pairwise manner, volcano plots were constructed  
505 (**Supplementary Figure 3**).

506 The volcano plot (**Supplementary Figure 3a**) for *H. gracilis* monoculture (HM) and the  
507 interaction of *H. gracilis* with *Paenibacillus* sp. AD87 (PH) shows 53 mass features (in green)  
508 located in the upper right quadrant, indicating that their concentrations are significantly higher  
509 in HM as compared to PH. 18 mass features (in red) in the upper left quadrant of the plot have  
510 a significantly lower concentration in HM as compared to PH. The ion intensity maps for  
511 these statistically significant metabolites are shown alongside box-and-whisker plots. The ion  
512 intensity maps are color coded based on the standard rainbow color scale where a pixel in red  
513 represented a high concentration and the pixel in black represents no concentration of the  
514 selected metabolite. As indicated,  $m/z$  425.2886 and  $m/z$  558.2832 show higher abundance in  
515 interaction sample PH, whereas  $m/z$  410.8587 and  $m/z$  716.7610 display high abundance in  
516 HM as compared to PH. For the pairwise analysis performed for *Paenibacillus* sp. AD87

517 monoculture (PM) and the co-culture of *H. gracilis* with *Paenibacillus* sp. AD87 (PH), 149  
518 mass features (in green) displayed significantly high concentration in PM and 75 mass  
519 features (in red) had significantly low concentration in PM as compared to PH  
520 (**Supplementary Figure 3b**). This is also evident in the box-and-whisker plots and the ion  
521 intensity maps that are presented for four statistically significant metabolites belonging to this  
522 set (**Supplementary Figure 2b**).

523 For the pairwise analysis for *H. gracilis* monoculture (HM) and the co-culture of *S.*  
524 *plymuthica* PRI-2C and *H. gracilis* (SH), 57 mass features (in green) displayed significantly  
525 high concentration in HM and 42 mass features had significantly low concentration in HM as  
526 compared to SH (**Supplementary Figure 3c**). The box-and-whisker plots along with the ion  
527 intensity maps for four statistically significant metabolites belonging to this set are shown in  
528 **Supplementary Figure 2c**. For the pairwise analysis for *S. plymuthica* PRI-2C monoculture  
529 (SM) and the interaction of *S. plymuthica* PRI-2C and *H. gracilis* (SH), 135 mass features (in  
530 green) displayed significantly high concentration in SM and 65 mass features had  
531 significantly low concentration in SM as compared to SH (**Supplementary Figure 3d**). The  
532 box-and-whisker plots along with the ion intensity maps for four statistically significant  
533 metabolites belonging to this set are shown in **Supplementary Figure 2d**.

534 To visualize the number of shared and unique metabolites amongst the monoculture and  
535 interaction samples Venn diagrams were plotted. The Venn diagram (**Supplementary Figure**  
536 **3e**) for monocultures *H. gracilis* and *Paenibacillus* sp. AD87 and their interaction shows 80  
537 metabolites unique to *H. gracilis* monoculture, 75 metabolites unique to *Paenibacillus* sp.  
538 AD87 monoculture and 100 metabolites that are unique during their interaction. 1062  
539 metabolites were shared within these three treatments. Similarly, the Venn diagram  
540 (**Supplementary Figure 3f**) for monocultures *H. gracilis* and *S. plymuthica* PRI-2C and their  
541 interaction shows 196 metabolites unique to *H. gracilis* monoculture, 48 metabolites unique  
542 to *S. plymuthica* PRI-2C monoculture and 120 metabolites that are unique during their  
543 interaction.

544

## 545 **Discussion**

546

547 Here we report the first time isolation of *H. gracilis* from a terrestrial soil sample. This  
548 bacterium passed a 0.1  $\mu\text{m}$  filter, which suggests a very small cell size, theoretically justifying  
549 referring to these bacteria as ultra-small bacteria (26). However, against our expectation, the  
550 microscopical analysis revealed that this bacterium is not ultra-small in cell size but possesses  
551 a very thin diameter and showed the typical spiraled morphology known for these species (60-



552 63). These observations are in line with previous research by Wang *et al.* showing that *H.*  
553 *gracilis* is capable of passing through filters of various pore sizes ranging from 0.45  $\mu\text{M}$  to  
554 0.1 $\mu\text{M}$  (64), most probably thanks to their cell shape and cell morphology. *In silico* analysis  
555 of 16 terrestrial metagenome data available on MG-RAST (<https://www.mg-rast.org/>) showed  
556 that *H. gracilis* was not present in terrestrial metagenome data (not shown) suggesting that *H.*  
557 *gracilis* is not commonly present in terrestrial soils. The bacterial interaction assays revealed  
558 that *H. gracilis* grows faster when interacting with *Paenibacillus* sp. AD87 or *S. plymuthica*  
559 PRI-2C. The cell numbers of *H. gracilis* were higher when exposed to cell-free supernatants  
560 of *Paenibacillus* sp. AD87 and *S. plymuthica* PRI-2C, suggesting that the metabolites  
561 released by the latter bacteria in co-cultures with *H. gracilis* are associated with improved  
562 growth of *H. gracilis*. We hypothesized that *H. gracilis* grows better in co-culture, either  
563 because growth is stimulated by signals produced by the other organism, or because the  
564 environment that is created by the other organism allows *H. gracilis* to make more efficient  
565 use of certain metabolic pathways. Indeed, the metabolic experiments with BioLog™ plates  
566 showed that during interspecific interactions of *H. gracilis* with *Paenibacillus* sp. AD87 or  
567 with *S. plymuthica* PRI-2C, more carbohydrates could be utilized compared to the  
568 monocultures. This is an interesting observation, and it may indicate that interaction of  
569 bacteria can trigger the production of exo-enzymes enabling the degradation of carbohydrates,  
570 which the bacteria were not able to degrade in monoculture.

571 We speculated that since *H. gracilis* grows better in interaction with other bacteria and is of  
572 relatively small cell size, *H. gracilis* might have evolved according to a genome streamlining  
573 strategy, i.e. the adaptive loss of genes for which functions it relies on interaction with other  
574 bacteria in the immediate environment. The whole-genome sequencing of *H. gracilis* revealed  
575 a genome size of 3.82 Mbp. This is a relatively small genome size for free-living soil bacteria  
576 that typically have estimated average genome sizes of  $\sim 4.7$  Mbp (34, 65-68). The *in silico*  
577 antiSMASH (43) comparison of genes that are part of secondary metabolite gene clusters  
578 showed that the *H. gracilis* genome contained only three gene clusters encoding the  
579 production of secondary metabolites (bacteriocins, terpenes, and aryl polyenes). Terpenes and  
580 aryl polyenes are known as protective compounds against abiotic stressors, while bacteriocins  
581 have antimicrobial activities against closely related bacteria (17, 69-73). We hypothesize that  
582 *H. gracilis* genome streamlining has allowed it to be more competitive, by retaining only the  
583 most essential metabolic functions while having roughly about one quarter less DNA to  
584 replicate during each cell division. Gene loss and reduced genome size may cause dependency  
585 on other microbes in their surroundings, and this may explain a considerable part of the

586 phenomenon that most of the detectable bacteria in the environment are not cultivable under  
587 laboratory conditions.

588 To investigate the mechanisms of interaction, we performed transcriptome analysis on  
589 the interaction pairs of *H. gracilis* with *S. plymuthica* PRI-2C and *Paenibacillus* sp. AD87.  
590 Interestingly, a higher amount of significantly differentially expressed genes was induced by  
591 *H. gracilis* in the other two competing bacteria as compared to the transcriptomic changes in  
592 *H. gracilis*. Several processes, enriched according to GO term enrichment analysis, could be  
593 part of a mechanism(s) mediating interactions between *H. gracilis* and *S. plymuthica* PRI-2C  
594 and *Paenibacillus* sp. AD87, for example genes related to chemotaxis. Moreover, the GO  
595 terms for signal transduction, secondary metabolite production and, cell motility were  
596 enriched in the transcriptome of *H. gracilis* during the co-cultivation with *Paenibacillus* sp.  
597 AD87, suggesting that chemotaxis and cell movement is an important feature during  
598 interspecific interactions between these two bacterial taxa (74, 75). In addition, GO terms  
599 referring to Iron-sulfur (Fe-S) complex assembly were enriched in the transcriptomes of *H.*  
600 *gracilis* during the co-cultivation with *S. plymuthica* PRI-2C and *Paenibacillus* sp. AD87. Fe-  
601 S clusters are important for sustaining fundamental life processes: they participate in electron  
602 transfer, substrate binding/activation, iron or sulfur storage, regulation of gene expression,  
603 and enzyme activity (76, 77). This up-regulation could indicate that, potentially, in co-culture,  
604 normal-sized bacteria released metabolites that *H. gracilis* used for synthesizing Fe-S  
605 complexes. It is also possible that iron-sulfur complex assembly is activated during  
606 competition with the interacting bacteria for sulfur, or iron collection (scavenging) (78-81).

607 The metabolic pathway analysis showed that the loss of genes in *H. gracilis* does not  
608 appear to have resulted in functional loss of metabolic pathways. Loss of non-essential and  
609 possibly redundant genes in several metabolic pathways could explain why and how the  
610 genome of *H. gracilis* has become so small. The missing genes are not essential to complete  
611 metabolic pathways and only appear to result in limited options in certain metabolic  
612 pathways. RAST analysis showed that all basal metabolic pathways remain feasible with the  
613 annotated enzymes and pathways of *H. gracilis*. The only exception is EC term 5.2.1.1  
614 (maleate isomerase) (it would help to specify in which pathway this enzyme is reported);  
615 There are several ways to synthesize fumarate, e.g. in the glycolysis pathway (63, 82, 83) and  
616 in the citric acid cycle (63, 84). Based on the available data, it cannot be unambiguously  
617 determined which alternative pathway may preferably be used by *H. gracilis* to synthesize  
618 fumarate.



619 The metabolomics analysis revealed the production of specific antimicrobial  
620 compounds such as pyrollnitrin (*S. plymuthica* PRI-2C) and 2,5-bis(1-methylethyl)-pyrazine  
621 (*Paenibacillus* sp. AD87) which are well known for their broad-spectrum antimicrobial  
622 activity (85-89). However, the produced antimicrobial compounds didn't show activity  
623 against *H. gracilis*: in both interactions, *H. gracilis* showed increased growth when growing  
624 in co-culture with either *Paenibacillus* sp.AD87 or *S. plymuthica* PRI-2C.

625 The understanding of natural metabolites that mediate interactions between organisms  
626 in natural environments is the key to elucidate ecosystem functioning. The detection and  
627 identification of the compounds that mediate such interactions is still challenging. Techniques  
628 such as mass spectrometry imaging (MSI) provide new opportunities to study  
629 environmentally relevant metabolites in their spatial context (90-92). In this study, the  
630 metabolomics was performed using three independent approaches namely DART-MS  
631 analysis, GC/MS-Q-TOF analysis and Laser Ablation Electrospray Ionization-Mass  
632 Spectrometry Imaging mass spectrometry (LAESI- IMS) from living bacterial colonies.  
633 LAESI Imaging MS analysis revealed that several mass features were detected in higher  
634 abundance during the co-cultivation of *H. gracilis* with *Paenibacillus* sp. AD87, these mass  
635 features were m/z 425.2886 and m/z 558.2832. LAESI-MSI is not suitable for unambiguous  
636 compound annotation, but LAESI- MSI can still be used for putative compound annotation.  
637 To annotate the detected mass features to compounds with high certainty, LAESI mass  
638 spectrometry imaging should be coupled with ion mobility separation as suggested by (93-  
639 95). Yet, LAESI-MSI can help to spatially distinguish the produced secondary metabolites of  
640 living bacterial colonies with limited sample preparation and can give insight into the spatial  
641 distribution of metabolites.

642 Several studies indicate that the volatile blend composition of the volatiles greatly depends on  
643 biotic interactions and on growth conditions (15, 19, 96-98). Here, a higher number of volatile  
644 compounds were detected in the bacterial co-cultures, most likely due to the combination of  
645 emitted volatiles of the interacting bacteria. The high number of sulfur-containing  
646 compounds indicates that these compounds are commonly produced by bacteria and might  
647 play an important role in signaling during interspecific interactions (99, 100). No novel  
648 volatile compounds were detected during the co-culture of the three bacteria.

649 Overall, our study showed that *H. gracilis* is able to pass through 0.1  $\mu$ M filter, and is present  
650 in terrestrial environments. The growth performance and physiological behavior of *H. gracilis*  
651 were dependent on the co-cultivated bacterial partner and they might be metabolically  
652 depending on the co-cultivated bacteria. At the same time, *H. gracilis* was able to change the

653 physiology, release of volatile organic compounds and secreted enzymes of the co-cultivated  
654 bacteria without direct cell-cell contact.

655 Microbial interspecific interactions play an important role in the functioning of the terrestrial  
656 ecosystem. Soil microbial communities are very diverse and dynamic and involve frequent  
657 and sporadic interspecific interactions. Our study indicates that sulfur and Fe-S clusters could  
658 play important role in microbial interspecific interactions in terrestrial environments and more  
659 studies are required to understand their role.. The study of sporadic interspecific interactions  
660 and the inclusion of rare taxa in future analysis could help to better understand microbial  
661 communities and functions of those. Could you exemplify how this study improved our  
662 understanding? production of sulfur compounds and Fe-S clusters maybe?

663

#### 664 **Data availability**

665 The raw data of this article will be made available by the authors to any qualified researcher  
666 upon request. The whole genome sequence of *Hylemonella gracilis* strain NS1 is available at  
667 the NCBI GenBank under accession # CP031395, the raw reads of the transcriptomics data  
668 are available at the Sequence Read Archive (SRA) <https://www.ncbi.nlm.nih.gov/sra>  
669 under accession # PRJNA483535.

670

#### 671 **Acknowledgement**

672 This work was financially supported by The Netherlands Organization for Scientific Research  
673 (NWO) VIDI personal grant 864.11.015 granted to PG. The authors also want to thank the  
674 students of the WUR bioinformatics course BIF-51806 (2018) for their input and primary data  
675 analysis and discussions on the data.

676

#### 677 **Author contributions**

678 OT and PG designed the experiments. OT, AO, PK and WIJ performed the lab experiments.  
679 OT, PK and performed the data analysis and prepared the figures and tables. OT, PK, AO,  
680 VT, MHM, PB, KJFV and PG wrote the manuscript. All authors read and critically revised  
681 the manuscript.

682

#### 683 **Conflict of Interest Statement**

684 The authors declare that the research was conducted in the absence of any commercial or  
685 financial relationships that could be construed as a potential conflict of interest.

686

687

## 688 References

- 689 1. Gibbons SM, Gilbert JA. 2015. Microbial diversity—exploration of natural  
690 ecosystems and microbiomes. *Current Opinion in Genetics & Development* 35:66-  
691 72.
- 692 2. Levin PA, Angert ER. 2015. Small but Mighty: Cell Size and Bacteria. *Cold Spring  
693 Harbor Perspectives in Biology* 7.
- 694 3. Uroz S, Buee M, Murat C, Frey-Klett P, Martin F. 2010. Pyrosequencing reveals a  
695 contrasted bacterial diversity between oak rhizosphere and surrounding soil.  
696 *Environmental Microbiology Reports* 2:281-288.
- 697 4. Curtis TP, Sloan WT, Scannell JW. 2002. Estimating prokaryotic diversity and its  
698 limits. *Proc Natl Acad Sci U S A* 99:10494-9.
- 699 5. Torsvik V, Ovreas L. 2002. Microbial diversity and function in soil: from genes to  
700 ecosystems. *Curr Opin Microbiol* 5:240-5.
- 701 6. Stubbendieck RM, Vargas-Bautista C, Straight PD. 2016. Bacterial Communities:  
702 Interactions to Scale. *Frontiers in Microbiology* 7.
- 703 7. Hibbing ME, Fuqua C, Parsek MR, Peterson SB. 2010. Bacterial competition:  
704 surviving and thriving in the microbial jungle. *Nature Reviews Microbiology*  
705 8:15-25.
- 706 8. Cornforth DM, Foster KR. 2013. Competition sensing: the social side of bacterial  
707 stress responses. *Nature Reviews Microbiology* 11:285-293.
- 708 9. Traxler MF, Watrous JD, Alexandrov T, Dorrestein PC, Kolter R. 2013. Interspecies  
709 Interactions Stimulate Diversification of the *Streptomyces coelicolor* Secreted  
710 Metabolome. *Mbio* 4(4), e00459-13.
- 711 10. Tyc O, van den Berg M, Gerard S, van Veen JA, Raaijmakers JM, de Boer W,  
712 Garbeva P. 2014. Impact of interspecific interactions on antimicrobial activity  
713 among soil bacteria. *Frontiers in Microbiology* 5,.
- 714 11. Seyedsayamdost MR, Traxler MF, Clardy J, Kolter R. 2012. Old Meets New: Using  
715 Interspecies Interactions to Detect Secondary Metabolite Production in  
716 Actinomycetes. *Natural Product Biosynthesis by Microorganisms and Plants, Pt C*  
717 517:89-109.
- 718 12. Crits-Christoph A, Diamond S, Butterfield CN, Thomas BC, Banfield JF. 2018.  
719 Novel soil bacteria possess diverse genes for secondary metabolite biosynthesis.  
720 *Nature* 558:440-444.
- 721 13. Reddy BVB, Kallifidas D, Kim JH, Charlop-Powers Z, Feng ZY, Brady SF. 2012.  
722 Natural Product Biosynthetic Gene Diversity in Geographically Distinct Soil  
723 Microbiomes. *Applied and Environmental Microbiology* 78:3744-3752.
- 724 14. Charlop-Powers Z, Owen JG, Reddy BVB, Ternei MA, Brady SF. 2014. Chemical-  
725 biogeographic survey of secondary metabolism in soil. *Proceedings of the  
726 National Academy of Sciences* 111:3757-3762.
- 727 15. Schulz S, Dickschat JS. 2007. Bacterial volatiles: the smell of small organisms. *Nat  
728 Prod Rep* 24:814-42.
- 729 16. Kai M, Hausteiner M, Molina F, Petri A, Scholz B, Piechulla B. 2009. Bacterial  
730 volatiles and their action potential. *Appl Microbiol Biotechnol* 81:1001-12.
- 731 17. Tyc O, Song C, Dickschat JS, Vos M, Garbeva P. 2017. The Ecological Role of  
732 Volatile and Soluble Secondary Metabolites Produced by Soil Bacteria. *Trends in  
733 Microbiology* 25:280-292.
- 734 18. Chernin L, Toklikishvili N, Ovadis M, Kim S, Ben-Ari J, Khmel I, Vainstein A. 2011.  
735 Quorum-sensing quenching by rhizobacterial volatiles. *Environmental  
736 Microbiology Reports* 3:698-704.

- 737 19. Tyc O, Zweers H, De Boer W, Garbeva P. 2015. Volatiles in inter-specific bacterial  
738 interactions. *Frontiers in Microbiology* 6.
- 739 20. Schmidt R, Cordovez V, de Boer W, Raaijmakers J, Garbeva P. 2015. Volatile affairs  
740 in microbial interactions. *ISME J* doi:10.1038/ismej.2015.42.
- 741 21. Effmert U, Kalderas J, Warnke R, Piechulla B. 2012. Volatile mediated interactions  
742 between bacteria and fungi in the soil. *J Chem Ecol* 38:665-703.
- 743 22. Rocha AM, Yuan Q, Close DM, O'Dell KB, Fortney JL, Wu J, Hazen TC. 2016. Rapid  
744 detection of microbial cell abundance in aquatic systems. *Biosensors and*  
745 *Bioelectronics* 85:915-923.
- 746 23. Qin Y, Hou J, Deng M, Liu Q, Wu C, Ji Y, He X. 2016. Bacterial abundance and  
747 diversity in pond water supplied with different feeds. *Scientific Reports* 6:35232.
- 748 24. Pan D, Nolan J, Williams KH, Robbins MJ, Weber KA. 2017. Abundance and  
749 Distribution of Microbial Cells and Viruses in an Alluvial Aquifer. *Frontiers in*  
750 *Microbiology* 8.
- 751 25. McKay DS, Gibson EK, Thomas-Keprta KL, Vali H, Romanek CS, Clemett SJ, Chillier  
752 XDF, Maechling CR, Zare RN. 1996. Search for Past Life on Mars: Possible Relic  
753 Biogenic Activity in Martian Meteorite ALH84001. *Science* 273:924-930.
- 754 26. Luef B, Frischkorn KR, Wrighton KC, Holman H-YN, Birarda G, Thomas BC, Singh  
755 A, Williams KH, Siegerist CE, Tringe SG, Downing KH, Comolli LR, Banfield JF.  
756 2015. Diverse uncultivated ultra-small bacterial cells in groundwater. *Nature*  
757 *Communications* 6:6372.
- 758 27. Uwins Philippa JR, Webb Richard I, Taylor Anthony P. 1998. Novel nano-  
759 organisms from Australian sandstones, vol 83, p 1541.
- 760 28. Lynch M. 2006. Streamlining and simplification of microbial genome architecture.  
761 *Annu Rev Microbiol* 60:327-49.
- 762 29. Neuenschwander SM, Ghai R, Pernthaler J, Salcher MM. 2017.  
763 Microdiversification in genome-streamlined ubiquitous freshwater  
764 Actinobacteria. *The Isme Journal* 12:185.
- 765 30. Brewer TE, Handley KM, Carini P, Gilbert JA, Fierer N. 2016. Genome reduction in  
766 an abundant and ubiquitous soil bacterium 'Candidatus Udaeobacter copiosus'.  
767 *Nature Microbiology* 2:16198.
- 768 31. Dolfing J. 2013. Syntrophy in microbial fuel cells. *The Isme Journal* 8:4.
- 769 32. Pande S, Kost C. 2017. Bacterial Unculturability and the Formation of  
770 Intercellular Metabolic Networks. *Trends in Microbiology* 25:349-361.
- 771 33. Morris JJ, Lenski RE, Zinser ER. 2012. The Black Queen Hypothesis: Evolution of  
772 Dependencies through Adaptive Gene Loss. *mBio* 3.
- 773 34. Giovannoni SJ, Cameron Thrash J, Temperton B. 2014. Implications of  
774 streamlining theory for microbial ecology. *The Isme Journal* 8:1553.
- 775 35. Garbeva P, van Elsas JD, de Boer W. 2012. Draft Genome Sequence of the  
776 Antagonistic Rhizosphere Bacterium *Serratia plymuthica* Strain PRI-2C. *Journal*  
777 *of Bacteriology* 194:4119-4120.
- 778 36. Tyc O, de Jager VCL, van den Berg M, Gerards S, Janssens TKS, Zaagman N, Kai M,  
779 Svatos A, Zweers H, Hordijk C, Besselink H, de Boer W, Garbeva P. 2017.  
780 Exploring bacterial interspecific interactions for discovery of novel antimicrobial  
781 compounds. *Microbial Biotechnology* 10:910-925.
- 782 37. de Boer W, Wagenaar AM, Klein Gunnewiek PJA, van Veen JA. 2007. In vitro  
783 suppression of fungi caused by combinations of apparently non-antagonistic soil  
784 bacteria. *Fems Microbiology Ecology* 59:177-185.
- 785 38. Garbeva P, de Boer W. 2009. Inter-specific Interactions Between Carbon-limited  
786 Soil Bacteria Affect Behavior and Gene Expression. *Microbial Ecology* 58:36-46.

- 787 39. Lane DJ. 1991. 16S/23S rRNA sequencing. In: Nucleic acid techniques in bacterial  
788 systematics. John Wiley and Sons, New York, NY.
- 789 40. Edwards U, Rogall T, Blocker H, Emde M, Bottger EC. 1989. Isolation and Direct  
790 Complete Nucleotide Determination of Entire Genes - Characterization of a Gene  
791 Coding for 16s-Ribosomal Rna. *Nucleic Acids Research* 17:7843-7853.
- 792 41. Seemann T. 2014. Prokka: rapid prokaryotic genome annotation. *Bioinformatics*  
793 30:2068-2069.
- 794 42. Jones P, Binns D, Chang HY, Fraser M, Li W, McAnulla C, McWilliam H, Maslen J,  
795 Mitchell A, Nuka G, Pesseat S, Quinn AF, Sangrador-Vegas A, Scheremetjew M,  
796 Yong SY, Lopez R, Hunter S. 2014. InterProScan 5: genome-scale protein function  
797 classification. *Bioinformatics* 30:1236-40.
- 798 43. Medema MH, Blin K, Cimermancic P, de Jager V, Zakrzewski P, Fischbach MA,  
799 Weber T, Takano E, Breitling R. 2011. antiSMASH: rapid identification, annotation  
800 and analysis of secondary metabolite biosynthesis gene clusters in bacterial and  
801 fungal genome sequences. *Nucleic Acids Research* 39:W339-46.
- 802 44. Langmead B, Salzberg SL. 2012. Fast gapped-read alignment with Bowtie 2. *Nat*  
803 *Meth* 9:357-359.
- 804 45. Li B, Dewey CN. 2011. RSEM: accurate transcript quantification from RNA-Seq  
805 data with or without a reference genome. *Bmc Bioinformatics* 12:1-16.
- 806 46. Robinson MD, McCarthy DJ, Smyth GK. 2010. edgeR: a Bioconductor package for  
807 differential expression analysis of digital gene expression data. *Bioinformatics* 26.
- 808 47. Zhou XB, Lindsay H, Robinson MD. 2014. Robustly detecting differential  
809 expression in RNA sequencing data using observation weights. *Nucleic Acids*  
810 *Research* 42.
- 811 48. Team RC. 2014. R: A language and environment for statistical computing. R  
812 Foundation for Statistical Computing, Vienna, Austria. 2013.
- 813 49. Aziz RK, Bartels D, Best AA, DeJongh M, Disz T, Edwards RA, Formsma K, Gerdes  
814 S, Glass EM, Kubal M, Meyer F, Olsen GJ, Olson R, Osterman AL, Overbeek RA,  
815 McNeil LK, Paarmann D, Paczian T, Parrello B, Pusch GD, Reich C, Stevens R,  
816 Vassieva O, Vonstein V, Wilke A, Zagnitko O. 2008. The RAST Server: Rapid  
817 Annotations using Subsystems Technology. *BMC Genomics* 9:75.
- 818 50. Overbeek R, Olson R, Pusch GD, Olsen GJ, Davis JJ, Disz T, Edwards RA, Gerdes S,  
819 Parrello B, Shukla M, Vonstein V, Wattam AR, Xia F, Stevens R. 2014. The SEED  
820 and the Rapid Annotation of microbial genomes using Subsystems Technology  
821 (RAST). *Nucleic Acids Research* 42:D206-D214.
- 822 51. Brettin T, Davis JJ, Disz T, Edwards RA, Gerdes S, Olsen GJ, Olson R, Overbeek R,  
823 Parrello B, Pusch GD, Shukla M, Thomason JA, 3rd, Stevens R, Vonstein V, Wattam  
824 AR, Xia F. 2015. RASTtk: a modular and extensible implementation of the RAST  
825 algorithm for building custom annotation pipelines and annotating batches of  
826 genomes. *Sci Rep* 5:8365.
- 827 52. Kanehisa M, Sato Y, Morishima K. 2016. BlastKOALA and GhostKOALA: KEGG  
828 Tools for Functional Characterization of Genome and Metagenome Sequences. *J*  
829 *Mol Biol* 428:726-731.
- 830 53. Kanehisa M, Sato Y, Kawashima M, Furumichi M, Tanabe M. 2016. KEGG as a  
831 reference resource for gene and protein annotation. *Nucleic Acids Research*  
832 44:D457-D462.
- 833 54. Muñoz S, Lacarta J, Pata MP, Jiménez JJ, Navarro E. 2014. Analysis of the Diversity  
834 of Substrate Utilisation of Soil Bacteria Exposed to Cd and Earthworm Activity  
835 Using Generalised Additive Models. *PLOS ONE* 9:e85057.



- 836 55. Rutgers M, Wouterse M, Drost SM, Breure AM, Mulder C, Stone D, Creamer RE,  
837 Winding A, Bloem J. 2016. Monitoring soil bacteria with community-level  
838 physiological profiles using Biolog™ ECO-plates in the Netherlands and Europe.  
839 *Applied Soil Ecology* 97:23-35.
- 840 56. Gibb S, Strimmer K. 2012. MALDIquant: a versatile R package for the analysis of  
841 mass spectrometry data. *Bioinformatics* 28:2270-1.
- 842 57. Chong J, Soufan O, Li C, Caraus I, Li S, Bourque G, Wishart DS, Xia J. 2018.  
843 *MetaboAnalyst 4.0: towards more transparent and integrative metabolomics*  
844 *analysis. Nucleic Acids Research* 46:W486-W494.
- 845 58. Bardou P, Mariette J, Escudié F, Djemiel C, Klopp C. 2014. jvenn: an interactive  
846 Venn diagram viewer. *BMC Bioinformatics* 15:293.
- 847 59. Medema MH, Blin K, Cimermancic P, de Jager V, Zakrzewski P, Fischbach MA,  
848 Weber T, Takano E, Breitling R. 2011. antiSMASH: rapid identification, annotation  
849 and analysis of secondary metabolite biosynthesis gene clusters in bacterial and  
850 fungal genome sequences. *Nucleic Acids Res* 39:W339-46.
- 851 60. Hylemon PB, Wells JS, Krieg NR, Jannasch HW. 1973. The Genus *Spirillum*: a  
852 Taxonomic Study1. *International Journal of Systematic and Evolutionary*  
853 *Microbiology* 23:340-380.
- 854 61. Pawlowsk D, Raslawsky A, Siebert G, Metzger D, Koudelka G. 2011. Identification  
855 of *Hylemonella gracilis* as an Antagonist of *Yersinia pestis* Persistence. *J Bioterr*  
856 *Biodef S* 3:2.
- 857 62. Spring S, Jackel U, Wagner M, Kampfer P. 2004. *Ottowia thiooxydans* gen. nov., sp.  
858 nov., a novel facultatively anaerobic, N<sub>2</sub>O-producing bacterium isolated from  
859 activated sludge, and transfer of *Aquaspirillum gracile* to *Hylemonella gracilis*  
860 gen. nov., comb. nov. *Int J Syst Evol Microbiol* 54:99-106.
- 861 63. Willems A. 2014. The Family Comamonadaceae, p 777-851. In Rosenberg E,  
862 DeLong EF, Lory S, Stackebrandt E, Thompson F (ed), *The Prokaryotes:*  
863 *Alphaproteobacteria and Betaproteobacteria* doi:10.1007/978-3-642-30197-  
864 1\_238. Springer Berlin Heidelberg, Berlin, Heidelberg.
- 865 64. Wang Y, Hammes F, Boon N, Egli T. 2007. Quantification of the filterability of  
866 freshwater bacteria through 0.45, 0.22, and 0.1 µm pore size filters and shape-  
867 dependent enrichment of filterable bacterial communities. *Environmental*  
868 *science & technology* 41:7080-7086.
- 869 65. Cobo-Simón M, Tamames J. 2017. Relating genomic characteristics to  
870 environmental preferences and ubiquity in different microbial taxa. *BMC*  
871 *Genomics* 18:499.
- 872 66. Angly FE, Willner D, Prieto-Davó A, Edwards RA, Schmieder R, Vega-Thurber R,  
873 Antonopoulos DA, Barott K, Cottrell MT, Desnues C, Dinsdale EA, Furlan M,  
874 Haynes M, Henn MR, Hu Y, Kirchman DL, McDole T, McPherson JD, Meyer F, Miller  
875 RM, Mundt E, Naviaux RK, Rodriguez-Mueller B, Stevens R, Wegley L, Zhang L,  
876 Zhu B, Rohwer F. 2009. The GAAS Metagenomic Tool and Its Estimations of Viral  
877 and Microbial Average Genome Size in Four Major Biomes. *PLOS Computational*  
878 *Biology* 5:e1000593.
- 879 67. Frank JA, Sørensen SJ. 2011. Quantitative Metagenomic Analyses Based on  
880 Average Genome Size Normalization. *Applied and Environmental Microbiology*  
881 77:2513-2521.
- 882 68. Xia LC, Cram JA, Chen T, Fuhrman JA, Sun F. 2011. Accurate Genome Relative  
883 Abundance Estimation Based on Shotgun Metagenomic Reads. *PLOS ONE*  
884 6:e27992.

- 885 69. Lee GW, Lee S, Chung MS, Jeong YS, Chung BY. 2015. Rice terpene synthase 20  
886 (OsTPS20) plays an important role in producing terpene volatiles in response to  
887 abiotic stresses. *Protoplasma* 252:997-1007.
- 888 70. Loreto F, Schnitzler J-P. 2010. Abiotic stresses and induced BVOCs. *Trends in*  
889 *Plant Science* 15:154-166.
- 890 71. Heng NCK, Wescombe PA, Burton JP, Jack RW, Tagg JR. 2007. The diversity of  
891 bacteriocins in Gram-positive bacteria. *In* Riley MA, Chavan MA (ed),  
892 *Bacteriocins: ecology and evolution*. Springer, Berlin.
- 893 72. Riley MA. 2011. Bacteriocin-mediated competitive interactions of bacterial  
894 populations and communities, p 13-26, *Prokaryotic Antimicrobial Peptides*.  
895 Springer.
- 896 73. Riley MA, Wertz JE. 2002. Bacteriocins: evolution, ecology, and application.  
897 *Annual Review of Microbiology* 56.
- 898 74. Wadhams GH, Armitage JP. 2004. Making sense of it all: bacterial chemotaxis.  
899 *Nature reviews Molecular cell biology* 5:1024.
- 900 75. Szurmant H, Ordal GW. 2004. Diversity in chemotaxis mechanisms among the  
901 bacteria and archaea. *Microbiol Mol Biol Rev* 68:301-319.
- 902 76. Johnson DC, Dean DR, Smith AD, Johnson MK. 2005. Structure, function, and  
903 formation of biological iron-sulfur clusters. *Annu Rev Biochem* 74:247-81.
- 904 77. Bandyopadhyay S, Chandramouli K, Johnson MK. 2008. Iron-sulfur cluster  
905 biosynthesis. *Biochem Soc Trans* 36:1112-9.
- 906 78. Crowley D, Wang Y, Reid C, Szaniszlo P. 1991. Mechanisms of iron acquisition  
907 from siderophores by microorganisms and plants, p 213-232, *Iron Nutrition and*  
908 *Interactions in Plants*. Springer.
- 909 79. Allison SD. 2005. Cheaters, diffusion and nutrients constrain decomposition by  
910 microbial enzymes in spatially structured environments. *Ecology Letters* 8:626-  
911 635.
- 912 80. Pagès A, Grice K, Vacher M, Welsh DT, Teasdale PR, Bennett WW, Greenwood P.  
913 2014. Characterizing microbial communities and processes in a modern  
914 stromatolite (S hark B ay) using lipid biomarkers and two - dimensional  
915 distributions of porewater solutes. *Environmental microbiology* 16:2458-2474.
- 916 81. Lill R. 2009. Function and biogenesis of iron-sulphur proteins. *Nature* 460:831.
- 917 82. Müller V. 2001. Bacterial fermentation. e LS.
- 918 83. Muñoz - Elías EJ, McKinney JD. 2006. Carbon metabolism of intracellular  
919 bacteria. *Cellular microbiology* 8:10-22.
- 920 84. Huynen MA, Dandekar T, Bork P. 1999. Variation and evolution of the citric-acid  
921 cycle: a genomic perspective. *Trends in microbiology* 7:281-291.
- 922 85. Beck HC, Hansen AM, Lauritsen FR. 2003. Novel pyrazine metabolites found in  
923 polymyxin biosynthesis by *Paenibacillus polymyxa*. *Fems Microbiology Letters*  
924 220:67-73.
- 925 86. Kucerova-Chlupacova M, Kunes J, Buchta V, Vejsova M, Opletalova V. 2015. Novel  
926 pyrazine analogs of chalcones: synthesis and evaluation of their antifungal and  
927 antimycobacterial activity. *Molecules* 20:1104-17.
- 928 87. Lapenda J, Silva P, Vicalvi M, Sena K, Nascimento S. 2015. Antimicrobial activity of  
929 prodigiosin isolated from *Serratia marcescens* UFPEDA 398. *World Journal of*  
930 *Microbiology and Biotechnology* 31:399-406.
- 931 88. Chernin L, Brandis A, Ismailov Z, Chet I. 1996. Pyrrolnitrin production by an  
932 *Enterobacter agglomerans* strain with a broad spectrum of antagonistic activity  
933 towards fungal and bacterial phytopathogens. *Current Microbiology* 32:208-212.



- 934 89. Dhar Purkayastha G, Mangar P, Saha A, Saha D. 2018. Evaluation of the biocontrol  
935 efficacy of a *Serratia marcescens* strain indigenous to tea rhizosphere for the  
936 management of root rot disease in tea. *PloS one* 13:e0191761-e0191761.
- 937 90. Petras D, Jarmusch AK, Dorrestein PC. 2017. From single cells to our planet—  
938 recent advances in using mass spectrometry for spatially resolved metabolomics.  
939 *Current Opinion in Chemical Biology* 36:24-31.
- 940 91. Hopwood DA. 2013. Imaging Mass Spectrometry Reveals Highly Specific  
941 Interactions between Actinomycetes To Activate Specialized Metabolic Gene  
942 Clusters. *Mbio* 4.
- 943 92. Fang J, Dorrestein PC. 2014. Emerging mass spectrometry techniques for the  
944 direct analysis of microbial colonies. *Current Opinion in Microbiology* 19:120-  
945 129.
- 946 93. Kulkarni P, Wilschut RA, Verhoeven KJ, van der Putten WH, Garbeva P. 2018.  
947 LAESI mass spectrometry imaging as a tool to differentiate the root metabolome  
948 of native and range-expanding plant species. *Planta* 248:1515-1523.
- 949 94. Li H, Smith BK, Márk L, Nemes P, Nazarian J, Vertes A. 2015. Ambient molecular  
950 imaging by laser ablation electrospray ionization mass spectrometry with ion  
951 mobility separation. *International Journal of Mass Spectrometry* 377:681-689.
- 952 95. Stopka SA, Agtuca BJ, Koppelaar DW, Paša - Tolić L, Stacey G, Vertes A, Anderton  
953 CR. 2017. Laser - ablation electrospray ionization mass spectrometry with ion  
954 mobility separation reveals metabolites in the symbiotic interactions of soybean  
955 roots and rhizobia. *The Plant Journal* 91:340-354.
- 956 96. Schulz S, Fuhlendorff J, Reichenbach H. 2004. Identification and synthesis of  
957 volatiles released by the myxobacterium *Chondromyces crocatus*. *Tetrahedron*  
958 60:3863-3872.
- 959 97. Garbeva P, Hordijk C, Gerards S, de Boer W. 2014. Volatiles produced by the  
960 mycophagous soil bacterium *Collimonas*. *Fems Microbiology Ecology* 87.
- 961 98. Blom D, Fabbri C, Connor EC, Schiestl FP, Klauser DR, Boller T, Eberl L, Weisskopf  
962 L. 2011. Production of plant growth modulating volatiles is widespread among  
963 rhizosphere bacteria and strongly depends on culture conditions. *Environmental*  
964 *Microbiology* 13:3047-3058.
- 965 99. Kabil O, Vitvitsky V, Banerjee R. 2014. Sulfur as a signaling nutrient through  
966 hydrogen sulfide. *Annual review of nutrition* 34:171-205.
- 967 100. Audrain B, Farag MA, Ryu CM, Ghigo JM. 2015. Role of bacterial volatile  
968 compounds in bacterial biology. *Fems Microbiology Reviews* 39:222-233.

969  
970  
971  
972  
973  
974  
975  
976  
977  
978  
979  
980  
981  
982  
983

984 **Figures and Tables**

985

986

987

988

989

990

991

992

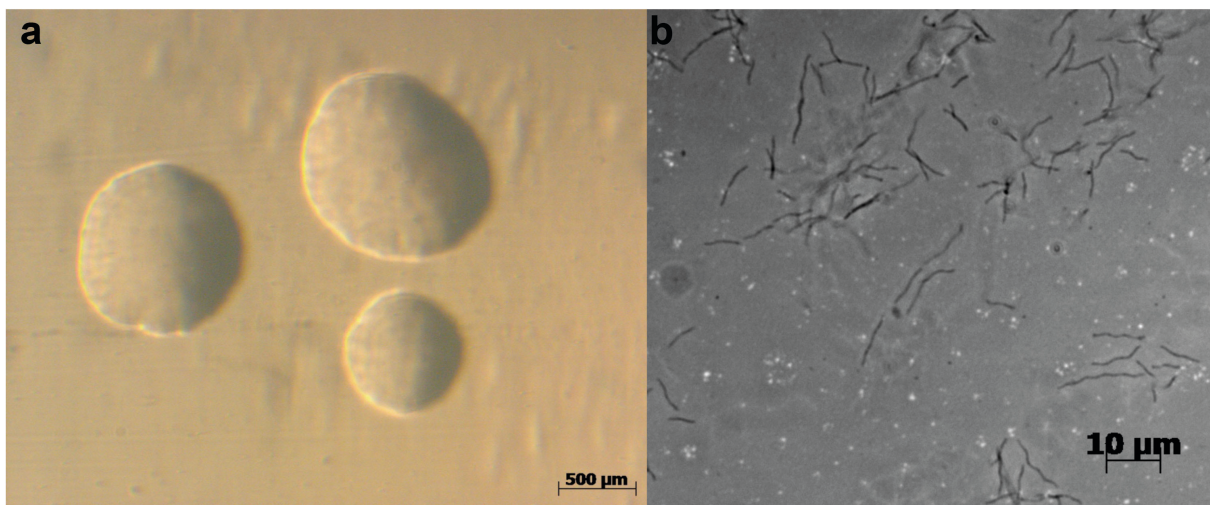

993

994 **Figure 1: Morphology of *Hylemonella gracilis* (a)** on 1/10<sup>th</sup> TSB- agar plates captured at  
995 20x magnification and **(b)** single bacterial cells captured at 400 X magnification showing  
996 their very thin, long and slender appearance in liquid media.

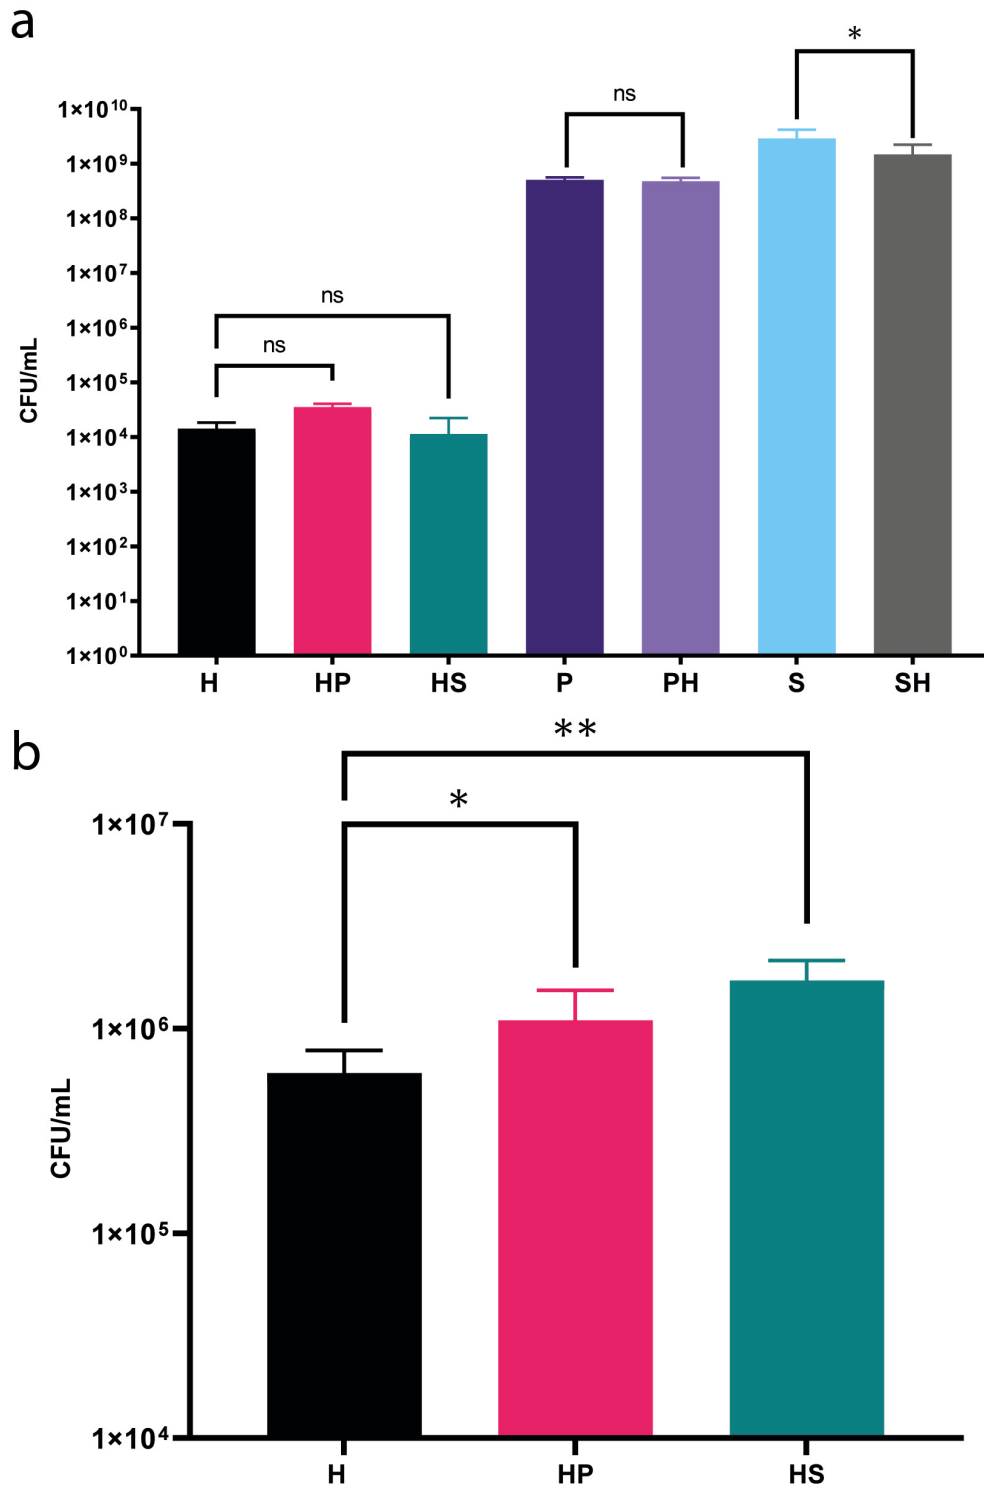

997

998 **Figure 2: Growth of bacterial mono and cocultures (a) on the plate-based experiment**  
999 **and (b) during the cell-free-supernatant (CFS) experiment.** Abbreviations: *H. gracilis*  
1000 monoculture (H), *Paenibacillus* sp. AD87 monoculture (P), *Paenibacillus* sp. AD87 – *H.*  
1001 *gracilis* coculture (HP), *S. plymuthica* PRI-2C monoculture (S), *S. plymuthica* - *H. gracilis*  
1002 coculture (SH). *H. gracilis* - *Paenibacillus* sp. AD87 coculture (HP), *H. gracilis* – *S.*  
1003 *plymuthica* PRI-2C coculture (HS). Significant differences in colony forming units per

1004 milliliter (CFU/mL) between co-cultures (treatment) and monocultures (controls) are  
 1005 indicated by asterisks (ONE-WAY ANOVA, post-hoc TUKEY test).

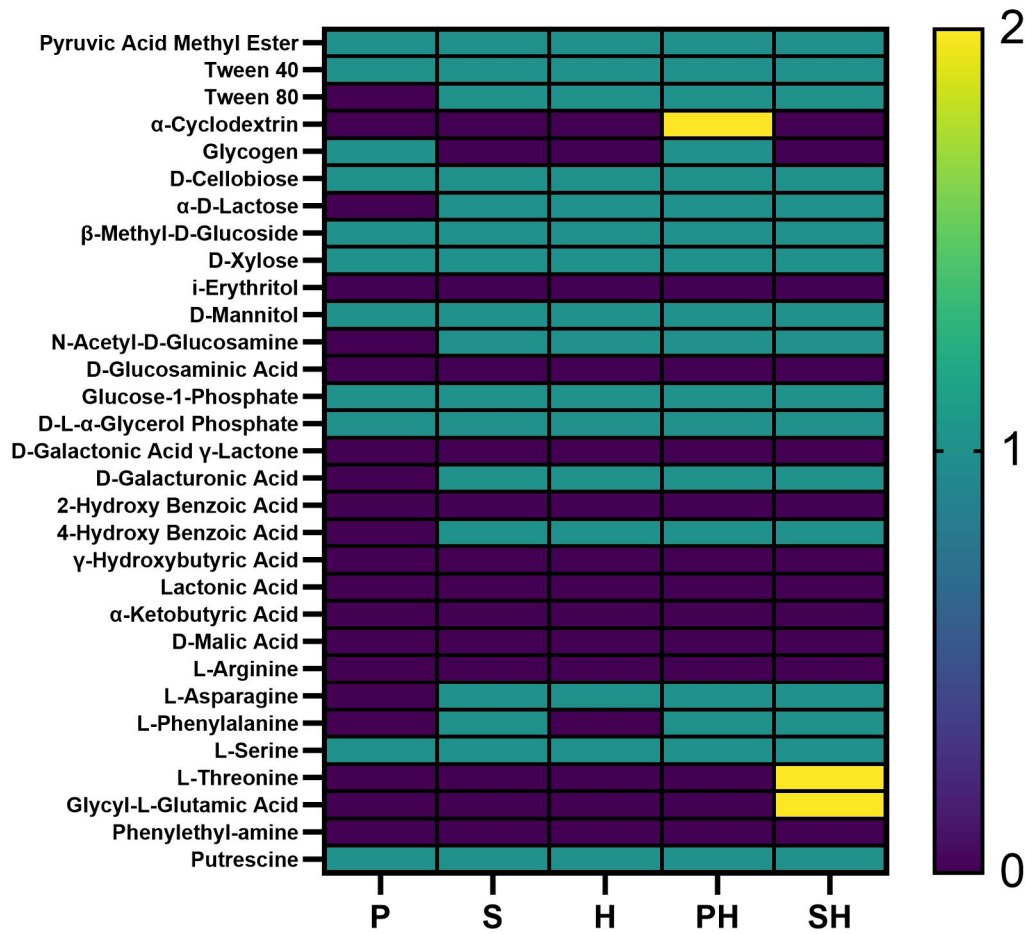

1006  
 1007 **Figure 3: Results of the Biolog EcoPlate™ experiment.** Bacteria were inoculated in  
 1008 monoculture or in pairwise combinations on the EcoPlate™ with 31 different carbon sources.  
 1009 Colour code: turquoise=carbon source could be utilized in monoculture (1), yellow= carbon  
 1010 source could be utilized only in co-culture (2) purple= carbon source could not be utilized (0).  
 1011 Abbreviations: *Paenibacillus* sp. AD87 monoculture (P), *Paenibacillus* sp. AD87 - *H. gracilis*  
 1012 coculture, (PH) *H. gracilis* monoculture (H), *S. plymuthica* PRI-2C monoculture (S), *S.*  
 1013 *plymuthica* PRI-2C - *H. gracilis* coculture (SH).

1014  
 1015  
 1016  
 1017  
 1018  
 1019  
 1020

1021  
1022

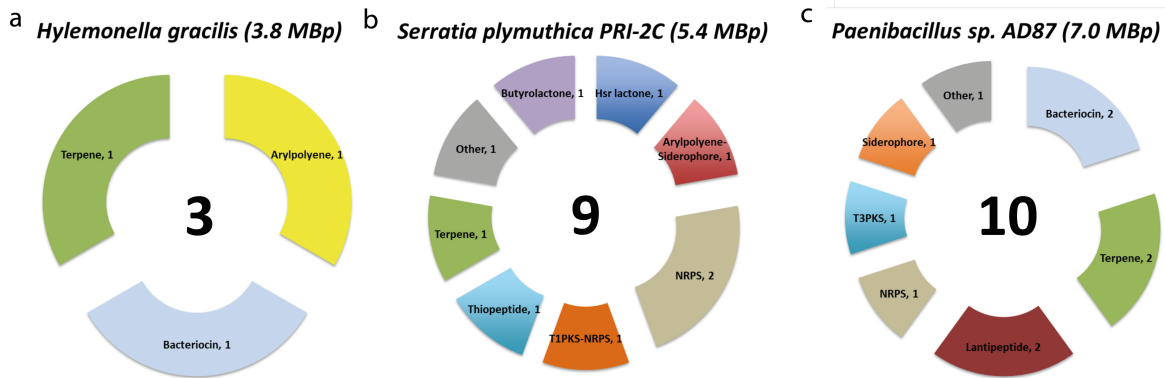

1023  
1024  
1025  
1026  
1027  
1028  
1029  
1030

**Figure 4:** *In silico* comparison of biosynthetic gene clusters (BGCs) predicted by antiSMASH in the genomes of three soil bacteria. From left to right (a) *H. gracilis* with a genome size of 3.8 MBp, n= 3 gene clusters for secondary metabolites, (b) *S. plymuthica* PRI-2C with a genome size of 5.4 MBp, n=9 gene clusters for secondary metabolites and (c) *Paenibacillus* sp. AD87 with a genome size of 7.0 MBp, n=10 gene clusters for secondary metabolites.

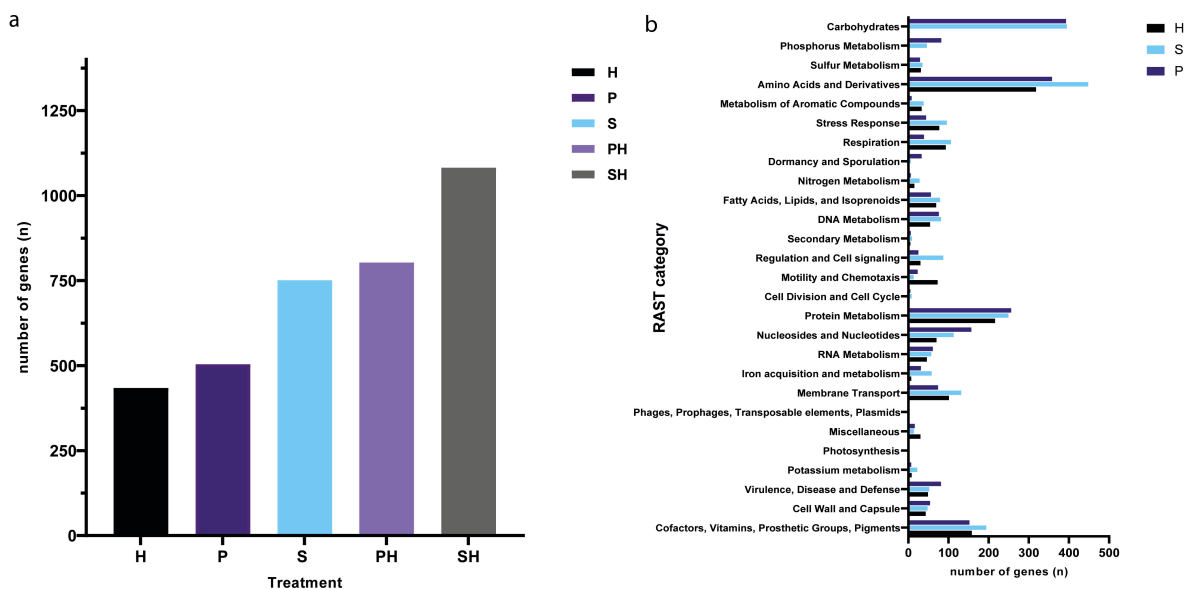

1031  
1032  
1033  
1034  
1035  
1036  
1037

**Figure 5:** Gene content comparison. (a) Box-plot showing the number (n) of all expressed genes (n) for the monocultures of *H. gracilis* (H), *Paenibacillus* sp. AD87 monoculture (P) and *S. plymuthica* PRI-2C monoculture (S) and during the interaction of *H. gracilis* with *Paenibacillus* sp. AD87 (PH) and for the interaction of *H. gracilis* with *S. plymuthica* PRI-2C (SH) determined by RAST. (b) Boxplot showing number (n) of expressed genes present in each RAST subsystem category for each of the monocultures.



1038  
1039  
1040  
1041  
1042

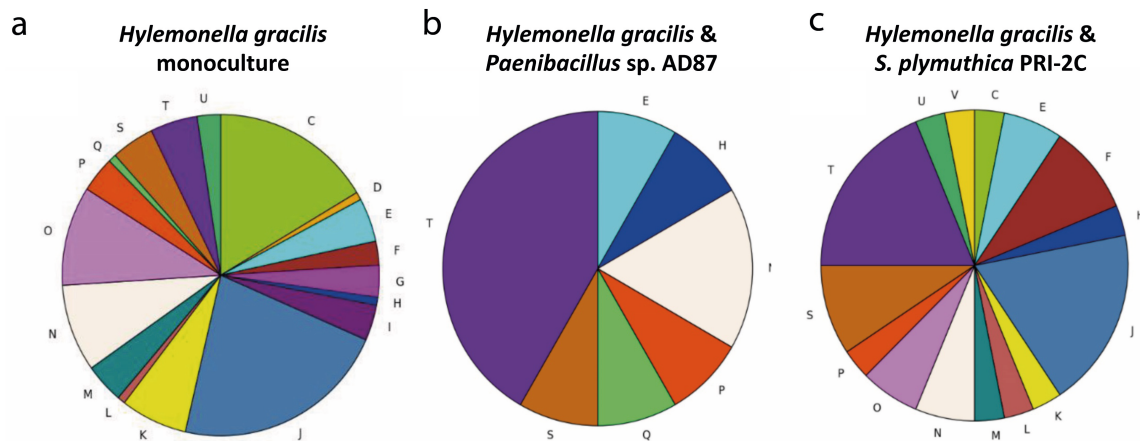

1043  
1044  
1045  
1046  
1047  
1048  
1049  
1050  
1051  
1052  
1053  
1054  
1055  
1056  
1057  
1058  
1059  
1060  
1061  
1062  
1063

**Figure 6: Pie-charts representing up-regulated genes identified by differential gene expression analysis and COG annotation (a) *Hylemonella gracilis* monoculture gene expression level (b) *H. gracilis* in co-culture with *Paenibacillus* sp. AD87; (c) *H. gracilis* co-culture with *S. plymuthica* PRI-2C. In the co-culture of *H. gracilis* with *Paenibacillus* sp. AD87, genes related to signal transduction (T) were the category with the most differentially expressed genes. In the co-culture of *H. gracilis* with *S. plymuthica* PRI-2C genes related to signal transduction (T), translation, ribosome structure and biogenesis (J) were the most prevalent differentially expressed gene categories. **COG- Abbreviations:** C: energy production and conversion; D: cell cycle control, cell division, chromosome partitioning; E: amino acid transport and metabolism; F: nucleotide transport and metabolism; G: carbohydrate transport and metabolism; H: coenzyme transport and metabolism; I: lipid transport and metabolism; J: translation, ribosomal structure and biogenesis; K: transcription; L: replication, recombination and repair; M: cell wall/membrane/envelope biogenesis; N: cell motility; NA: not assigned; O: posttranslational modification, protein turnover, chaperones; P: inorganic ion transport and metabolism; Q: secondary metabolites biosynthesis, transport and catabolism; R: general function prediction only; S: function unknown; T: signal transduction mechanisms; U: intracellular trafficking, secretion, and vesicular transport; V: defense mechanisms.**

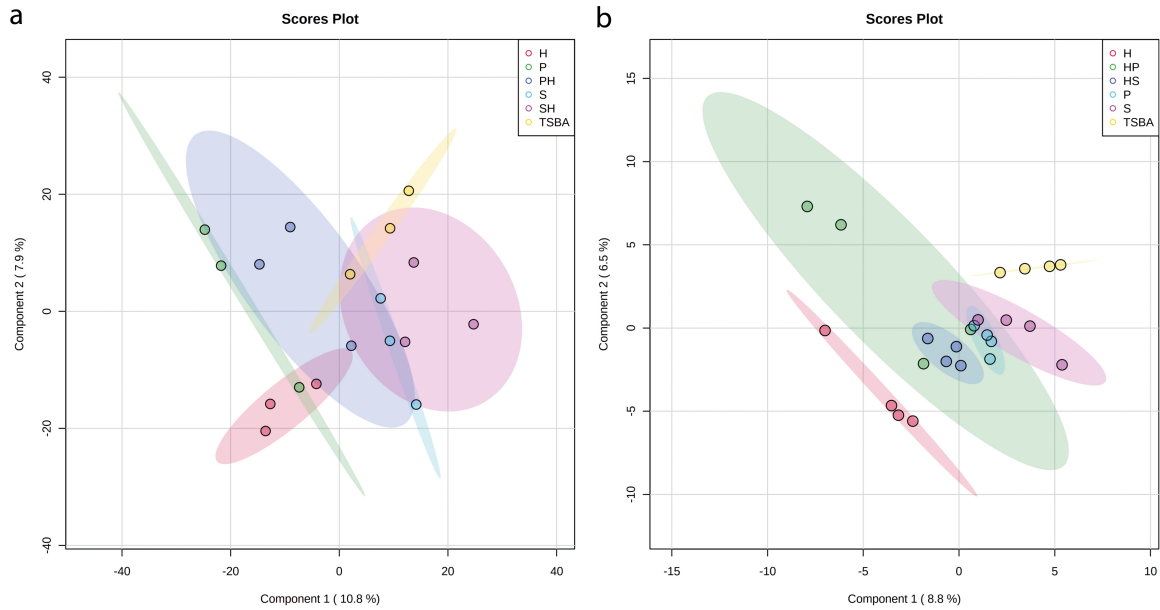

1064

1065 **Figure 7: PLS-DA plots of the metabolomics data** (a) PLS-DA 2D- plots of volatiles  
 1066 emitted by monocultures and pairwise combinations of *H. gracilis*, *Paenibacillus* sp. AD87  
 1067 and *Serratia plymuthica* after ten days of inoculation, time point (t=10 days) (b) PLS-DA 2D-  
 1068 plots of DART-MS data of monocultures and mixtures of *H. gracilis*, *Paenibacillus* sp. AD87  
 1069 and *S. plymuthica* PRI-2C after ten days of inoculation, time point (t=10 days).

1070

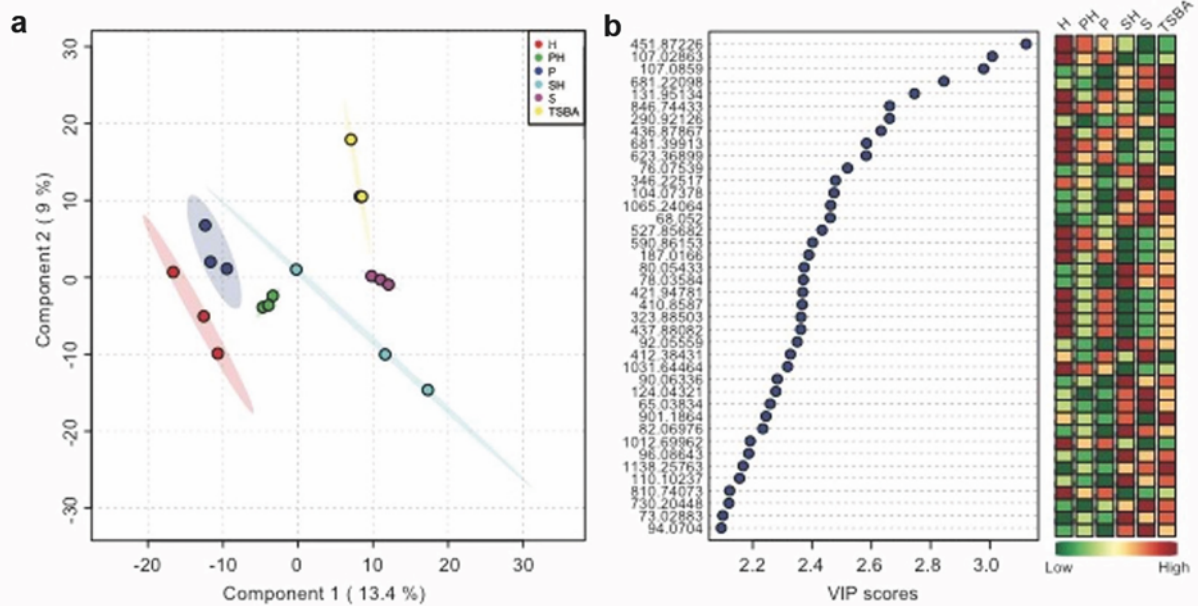

1071

1072 **Figure 8: PLS-DA plots of the first 40 significant mass features observed in LAESI-MSI**  
 1073 **data.** (a) PLS-DA score plot for *H. gracilis* monoculture (H), *Paenibacillus* sp. AD87  
 1074 monoculture (P), *Paenibacillus* sp. AD87 – *H. gracilis* co-culture (PH), *S. plymuthica* PRI-2C  
 1075 monoculture (S), *S. plymuthica* PRI-2C - *H. gracilis* co-culture (SH) and TSBA control  
 1076 (TSBA). (b) Top 40 statistically significant features identified by PLS-DA based on Variable

1077 Importance in Projection (VIP) score. The colored boxes on the right indicate the relative  
 1078 concentrations of the corresponding metabolite in each group under study.

1079

## 1080 Tables

1081 **Table 1:** Genome assembly statistics and outcome of *in silico* analysis of secondary  
 1082 metabolite gene clusters of *H. gracilis*, *S. plymuthica* PRI-2C and *Paenibacillus* sp. AD87.

| Feature / Organism                                                  | <i>Hylemonella gracilis</i> | <i>S. plymuthica</i> PRI-2C | <i>Paenibacillus</i> sp. AD87 |
|---------------------------------------------------------------------|-----------------------------|-----------------------------|-------------------------------|
| contigs                                                             | 1                           | 1                           | 30                            |
| bases                                                               | 3822245                     | 5474685                     | 7086713                       |
| number of chromosomes                                               | 1                           | 1                           | 1                             |
| size chromosome 1                                                   | 3822245                     | 5464425                     | 7086713                       |
| CDS                                                                 | 3648                        | 4929                        | 6216                          |
| GC- content (%)                                                     | 65.1                        | 55.7                        | 46.2                          |
| number of RNAs                                                      | 53                          | 109                         | 146                           |
| genes                                                               | 3625                        | 5284                        | 6375                          |
| <i>in silico</i> detected secondary metabolite clusters (antiSMASH) | 3                           | 9                           | 10                            |
| <b>Total genome size (bases)</b>                                    | <b>3822245</b>              | <b>5474685</b>              | <b>7086713</b>                |

1083

1084

1085

1086

1087

1088 **Table 2:** Overview of the transcriptome analysis, number (n) of significantly differentially  
 1089 expressed genes of *H. gracilis* responding to *S. plymuthica* PRI-2C or to *Paenibacillus* sp.  
 1090 AD87, *Serratia plymuthica* PRI-2C responding to *H. gracilis* and *Paenibacillus* sp. AD87  
 1091 responding to *H. gracilis* at day 5 and day 10.

| Organism                          | Interacting organism              | time point (d) | Significantly differentially expressed genes |                | Total (n)  |
|-----------------------------------|-----------------------------------|----------------|----------------------------------------------|----------------|------------|
|                                   |                                   |                | up-regulated                                 | down-regulated |            |
| <i>Serratia plymuthica</i> PRI-2C | <i>Hylemonella gracilis</i>       | 5              | 25                                           | 36             | 61         |
|                                   |                                   | 10             | 10                                           | 0              | 10         |
|                                   |                                   | 5              | 8                                            | 0              | 8          |
|                                   |                                   | 10             | 0                                            | 0              | 0          |
| <i>Hylemonella gracilis</i>       | <i>Serratia plymuthica</i> PRI-2C | 5              | 1                                            | 0              | 1          |
|                                   |                                   | 10             | 129                                          | 53             | 182        |
|                                   | <i>Paenibacillus</i> sp. AD87     | 5              | 0                                            | 0              | 0          |
|                                   |                                   | 10             | 4                                            | 11             | 15         |
| <b>Total (n)</b>                  |                                   |                | <b>177</b>                                   | <b>100</b>     | <b>277</b> |

1092

1093

1094

1095  
1096  
1097  
1098  
1099  
1100

**Table 3:** Tentatively identified volatile organic compounds (VOCs) produced by a *H. gracilis*, *S. plymuthica* PRI-2C and *Paenibacillus* sp. AD87 strains in mono- and cocultures.

| #                                       | Compound name                   | RT*   | ELRI** | p-value*** | chemical class | Detected in bacterial culture |           |           |           |           |
|-----------------------------------------|---------------------------------|-------|--------|------------|----------------|-------------------------------|-----------|-----------|-----------|-----------|
|                                         |                                 |       |        |            |                | H                             | S         | P         | SH        | PH        |
| 1                                       | 2-methylfuran                   | 2.18  | 738    | 0.041      | Furan          | X                             |           | X         | X         | X         |
| 2                                       | 2-methylpropanoic Acid          | 3.01  | 755    | 0.014      | Alkenes        | X                             | X         | X         | X         | X         |
| 3                                       | mix pentanal + heptane          | 3.21  | 760    | 0.008      | Alkenes        | X                             |           |           | X         | X         |
| 4                                       | methyl thycocyanate             | 3.44  | 764    | 0.020      | Thioesters     | X                             | X         | X         | X         | X         |
| 5                                       | 1-Pentanol                      | 3.95  | 772    | 0.012      | Alkenes        |                               | X         | X         | X         | X         |
| 6                                       | dimethyl disulfide              | 4.01  | 775    | 0.012      | Sulfides       | X                             | X         | X         | X         | X         |
| 7                                       | unknown compound 1              | 4.15  | 778    | 0.003      | -              |                               | X         | X         | X         |           |
| 8                                       | toluene                         | 4.44  | 784    | 0.014      | Benzenoids     | X                             | X         | X         | X         | X         |
| 9                                       | methyl Isovalerate              | 4.76  | 789    | 0.018      | Terpenes       |                               | X         | X         | X         | X         |
| 10                                      | cyclohexane                     | 8.07  | 852    | 0.031      | Alkenes        |                               | X         | X         | X         | X         |
| 11                                      | dimethyl trisulfide             | 11.35 | 914    | 0.013      | Sulfides       | X                             | X         | X         | X         | X         |
| 12                                      | benzoxitrilie                   | 12.06 | 928    | 0.037      | Alkenes        | X                             | X         | X         | X         | X         |
| 13                                      | 2-Ethyl-4-methylpentan-1-ol     | 17.26 | 1026   | 0.015      | Alkenes        |                               | X         | X         | X         | X         |
| 14                                      | 2,5-bis(1-methylethyl)-pyrazine | 20.56 | 1090   | 0.031      | Pyrazines      |                               |           | X         |           | X         |
| 15                                      | undecane                        | 21.31 | 1100   | 0.014      | Alkenes        | X                             |           | X         | X         | X         |
| 16                                      | unknown compound 2              | 24.34 | 1140   | 0.013      | -              |                               |           | X         |           |           |
| 17                                      | unknown compound 3              | 25.92 | 1160   | 0.011      | -              | X                             | X         | X         | X         | X         |
| 19                                      | unknown compound 4              | 26.40 | 1165   | 0.018      | -              | X                             |           | X         | X         | X         |
| 20                                      | unknown compound 5              | 26.90 | 1170   | 0.003      | -              | X                             |           | X         |           | X         |
| 21                                      | alpha-terpineol                 | 27.34 | 1178   | 0.016      | Terpenes       | X                             | X         | X         | X         | X         |
| 22                                      | undecane, 2,6-dimethyl          | 28.27 | 1190   | 0.004      | Benzenoids     | X                             | X         | X         | X         | X         |
| 23                                      | gamma-terpineol                 | 28.42 | 1192   | 0.006      | Terpenes       | X                             |           |           | X         |           |
| 24                                      | terpene like compound 1         | 29.32 | 1202   | 0.012      | Terpenes       | X                             |           |           | X         |           |
| 25                                      | terpene like compound 2         | 31.49 | 1231   | 0.009      | Terpenes       | X                             | X         | X         | X         | X         |
| <b>Number of detected compounds (n)</b> |                                 |       |        |            |                | <b>16</b>                     | <b>15</b> | <b>20</b> | <b>20</b> | <b>19</b> |

1101  
1102  
1103  
1104  
1105  
1106  
1107  
1108  
1109  
1110  
1111

Abbreviations:

*H. gracilis* monoculture, SM= *Serratia plymuthica* PRI-2C monoculture, PM= *Paenibacillus* sp. AD87 monoculture, PH= *Paenibacillus* sp. AD87 and *H. gracilis* co-culture, SH= *Serratia plymuthica* PRI-2C and *H. gracilis* co-culture

# = Compound number

RT\* = Retention time, the RT value stated is the average of three technical replicates.

ELRI\*\* = Experimental linear retention index value, the RI value stated is the average of three replicates.

p-value\*\*\*= statistical significance (peak area and peak intensity)
